# Supplementary material
Source: publisher figshare collection journal article supplement (https://acs.figshare.com/ndownloader/files/5785824)
Supplement: Supplementary file 1 [file 5785824]

<sup>13</sup>C spectrum with <sup>1</sup>H decoupling

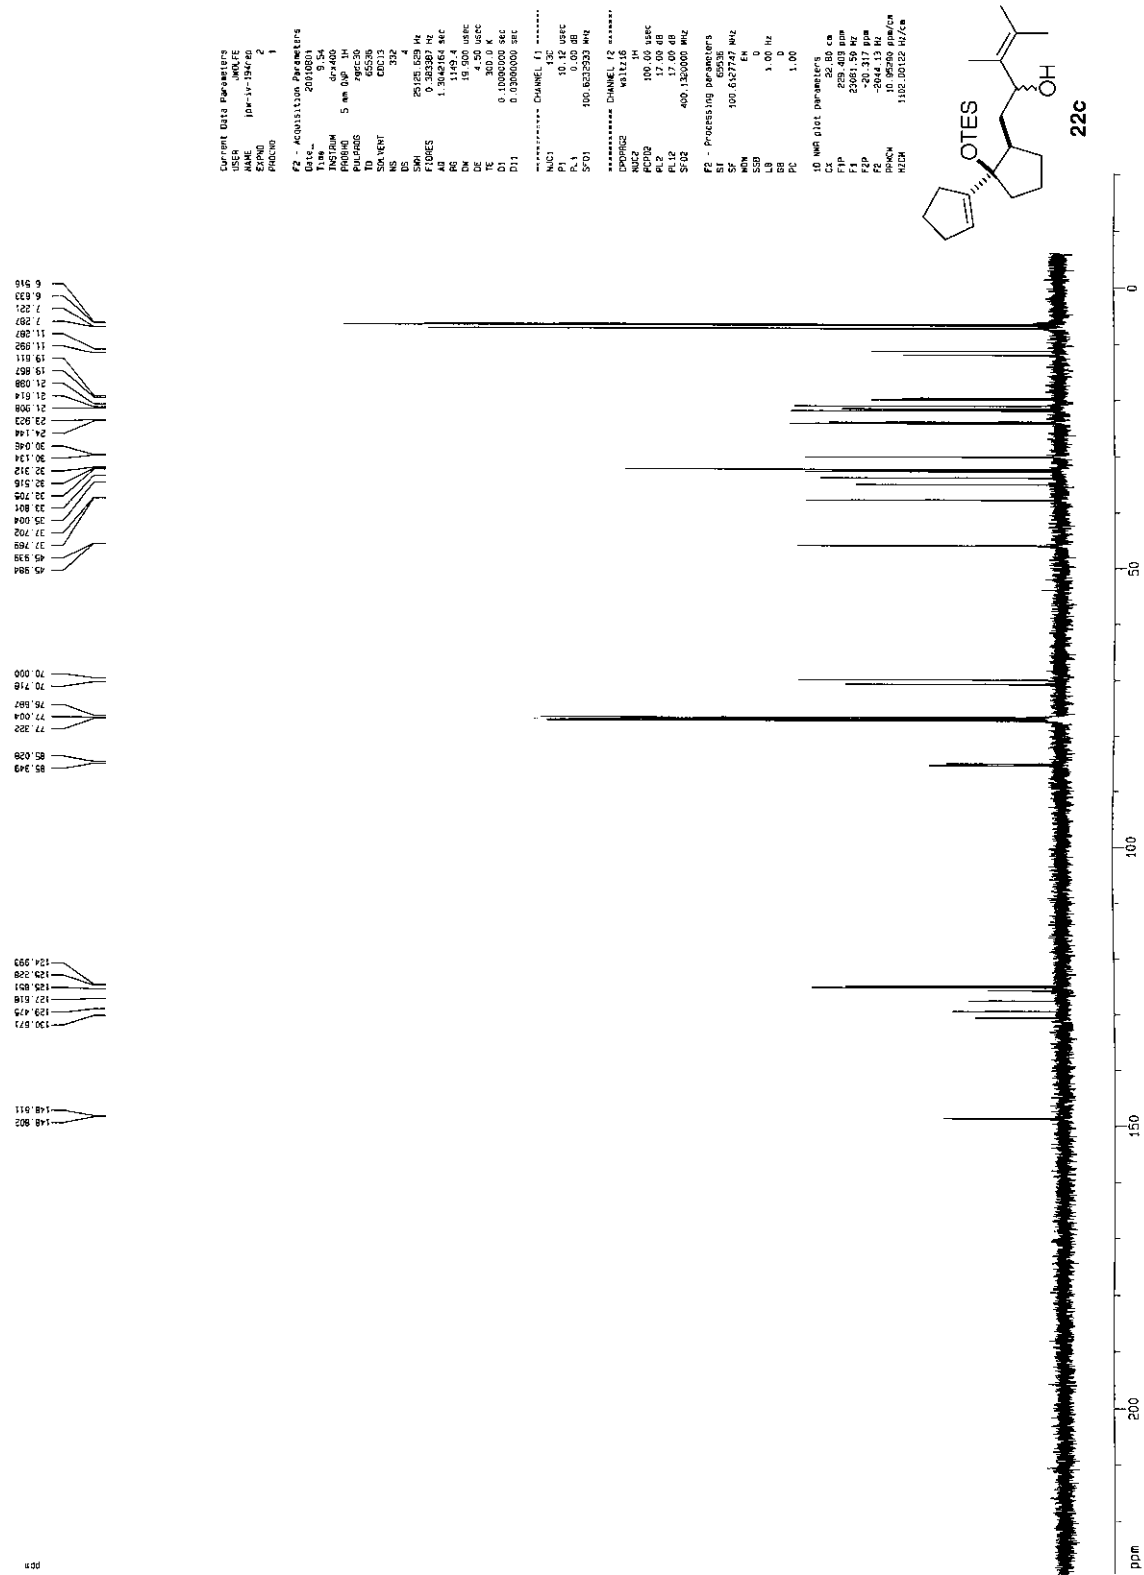

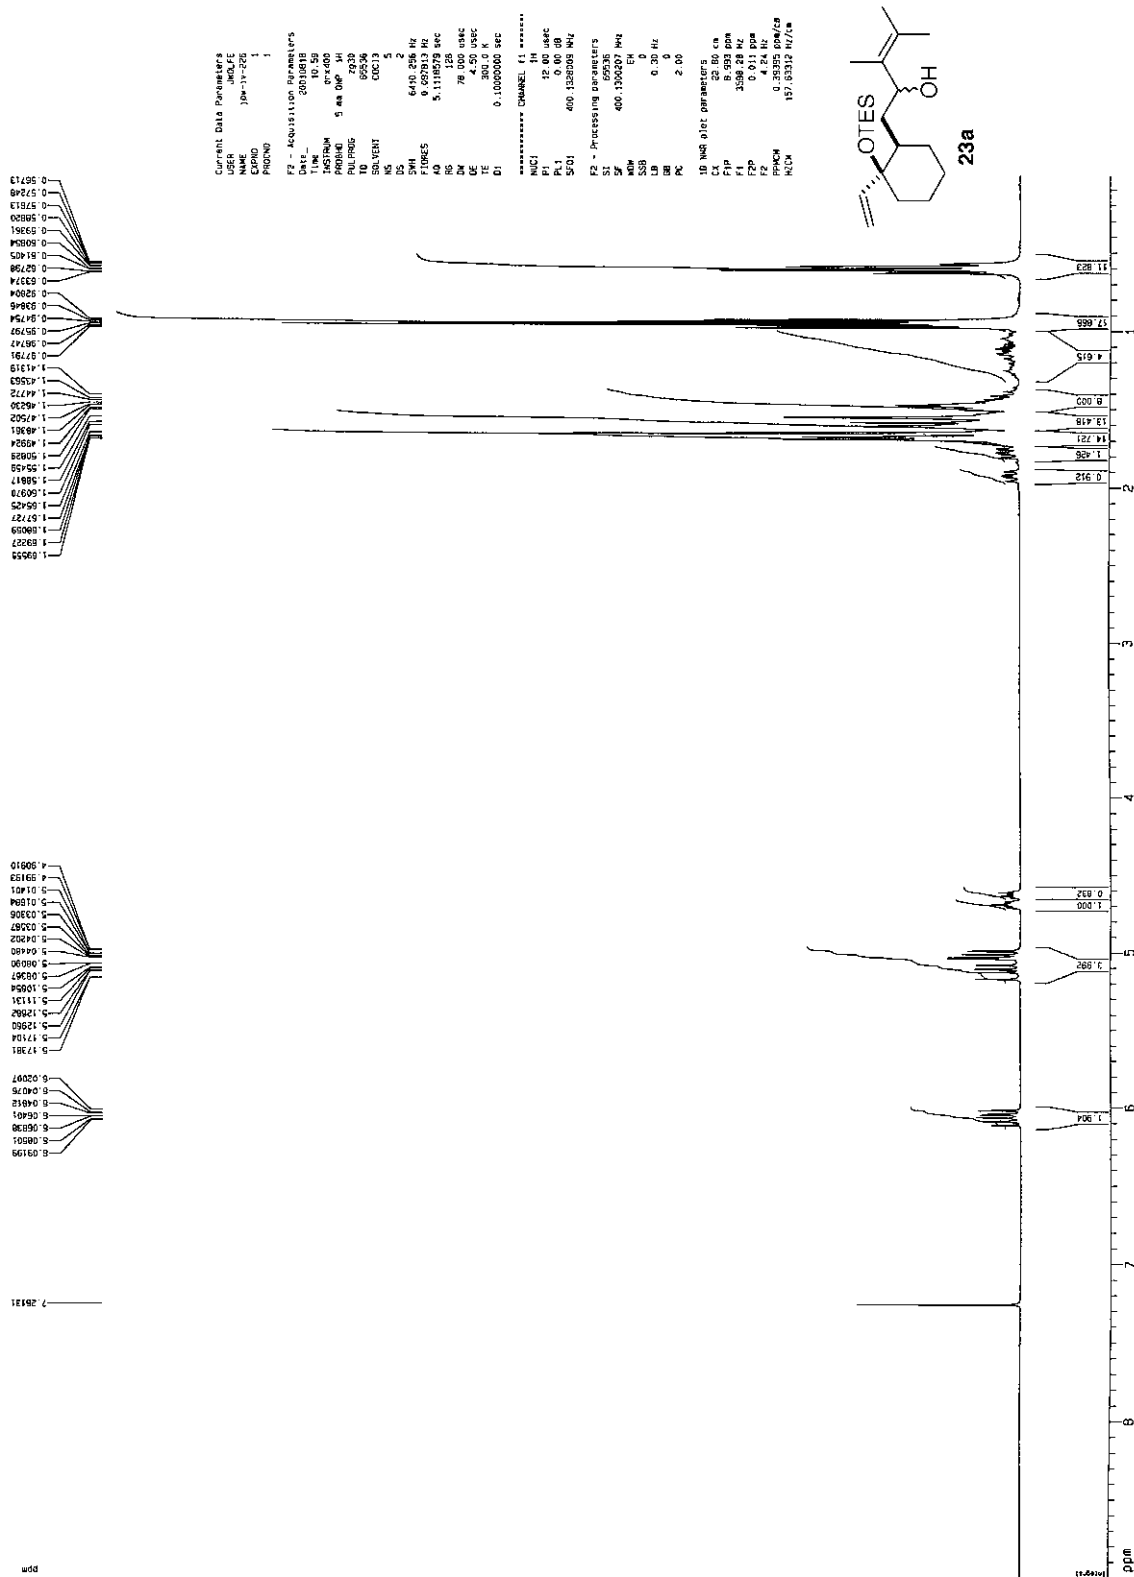

<sup>13</sup>C spectrum with <sup>1</sup>H decoupling

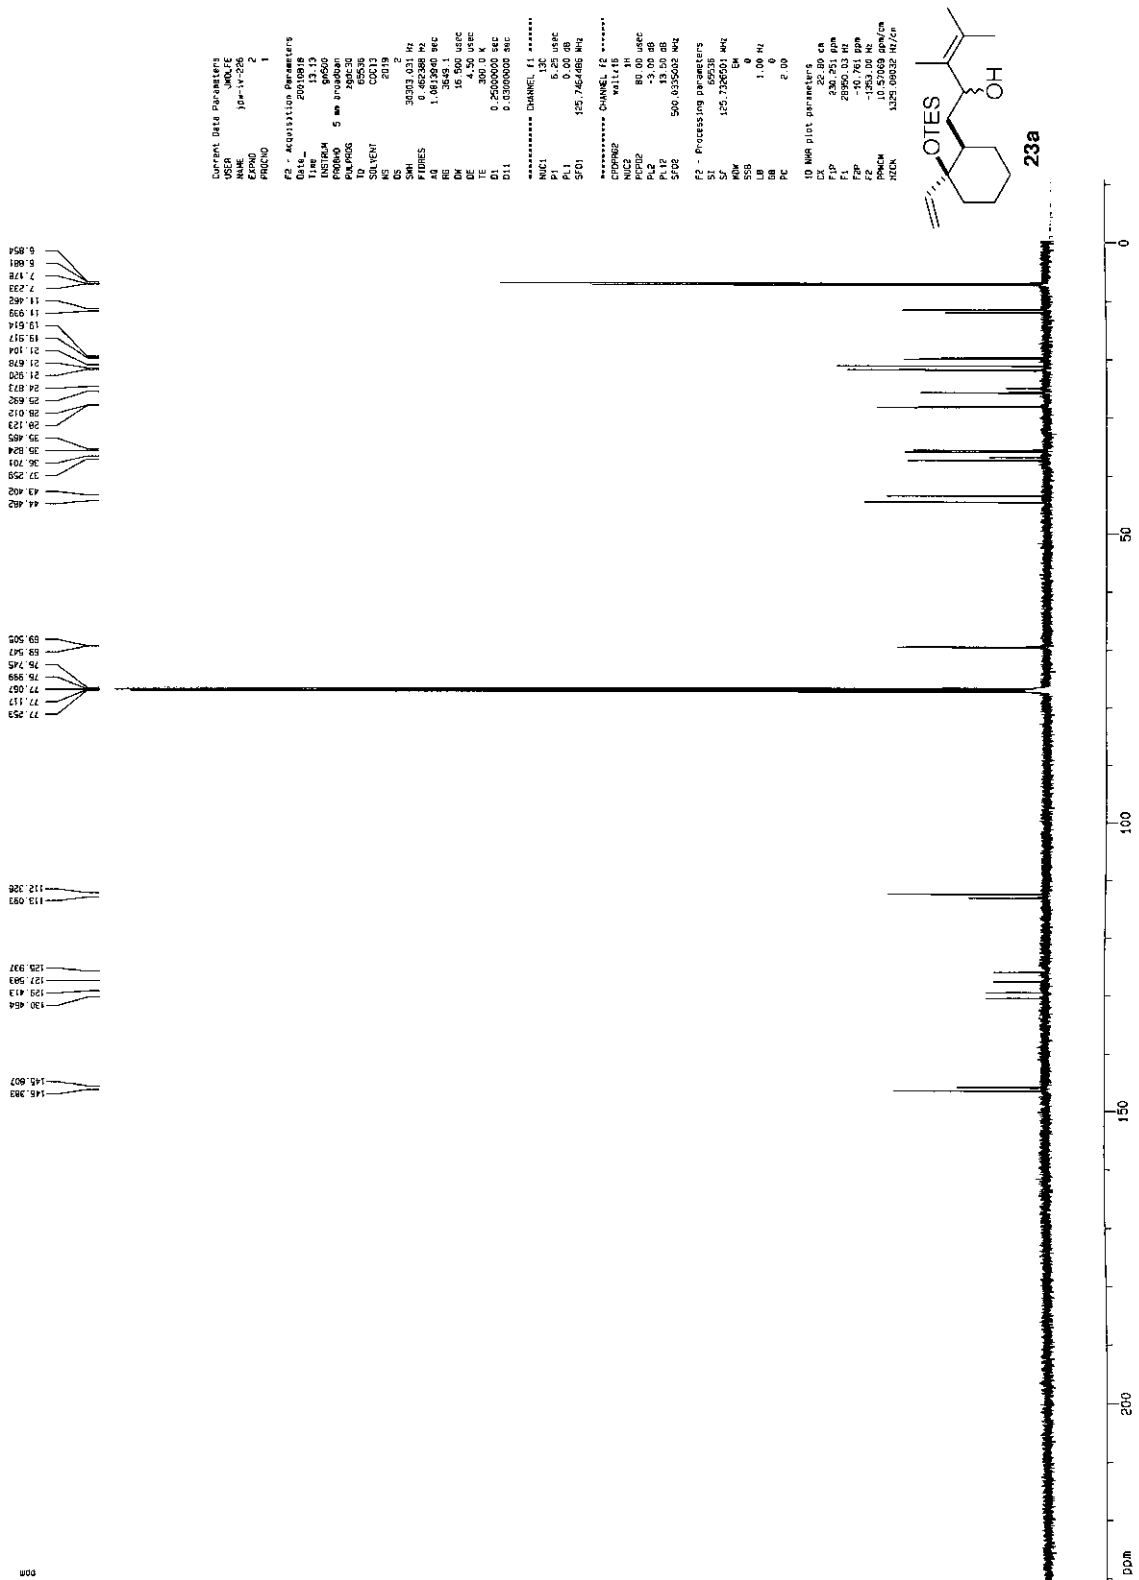

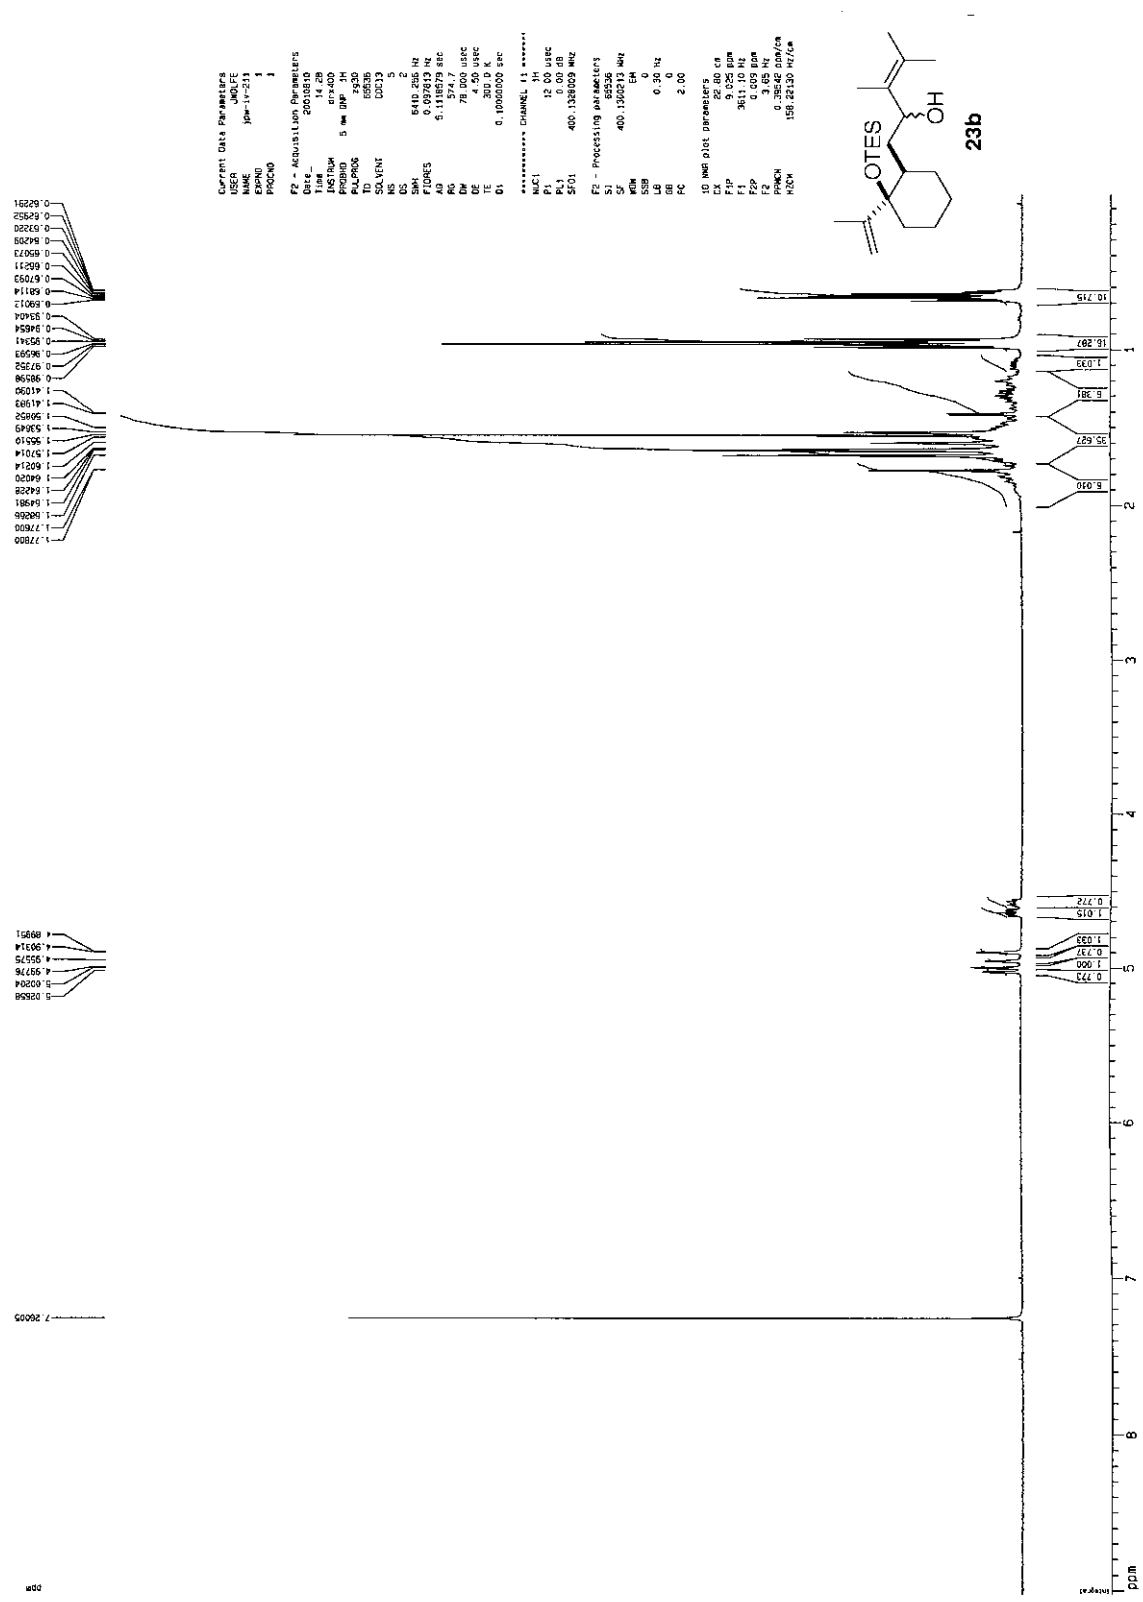

<sup>13</sup>C spectrum with <sup>1</sup>H decoupling

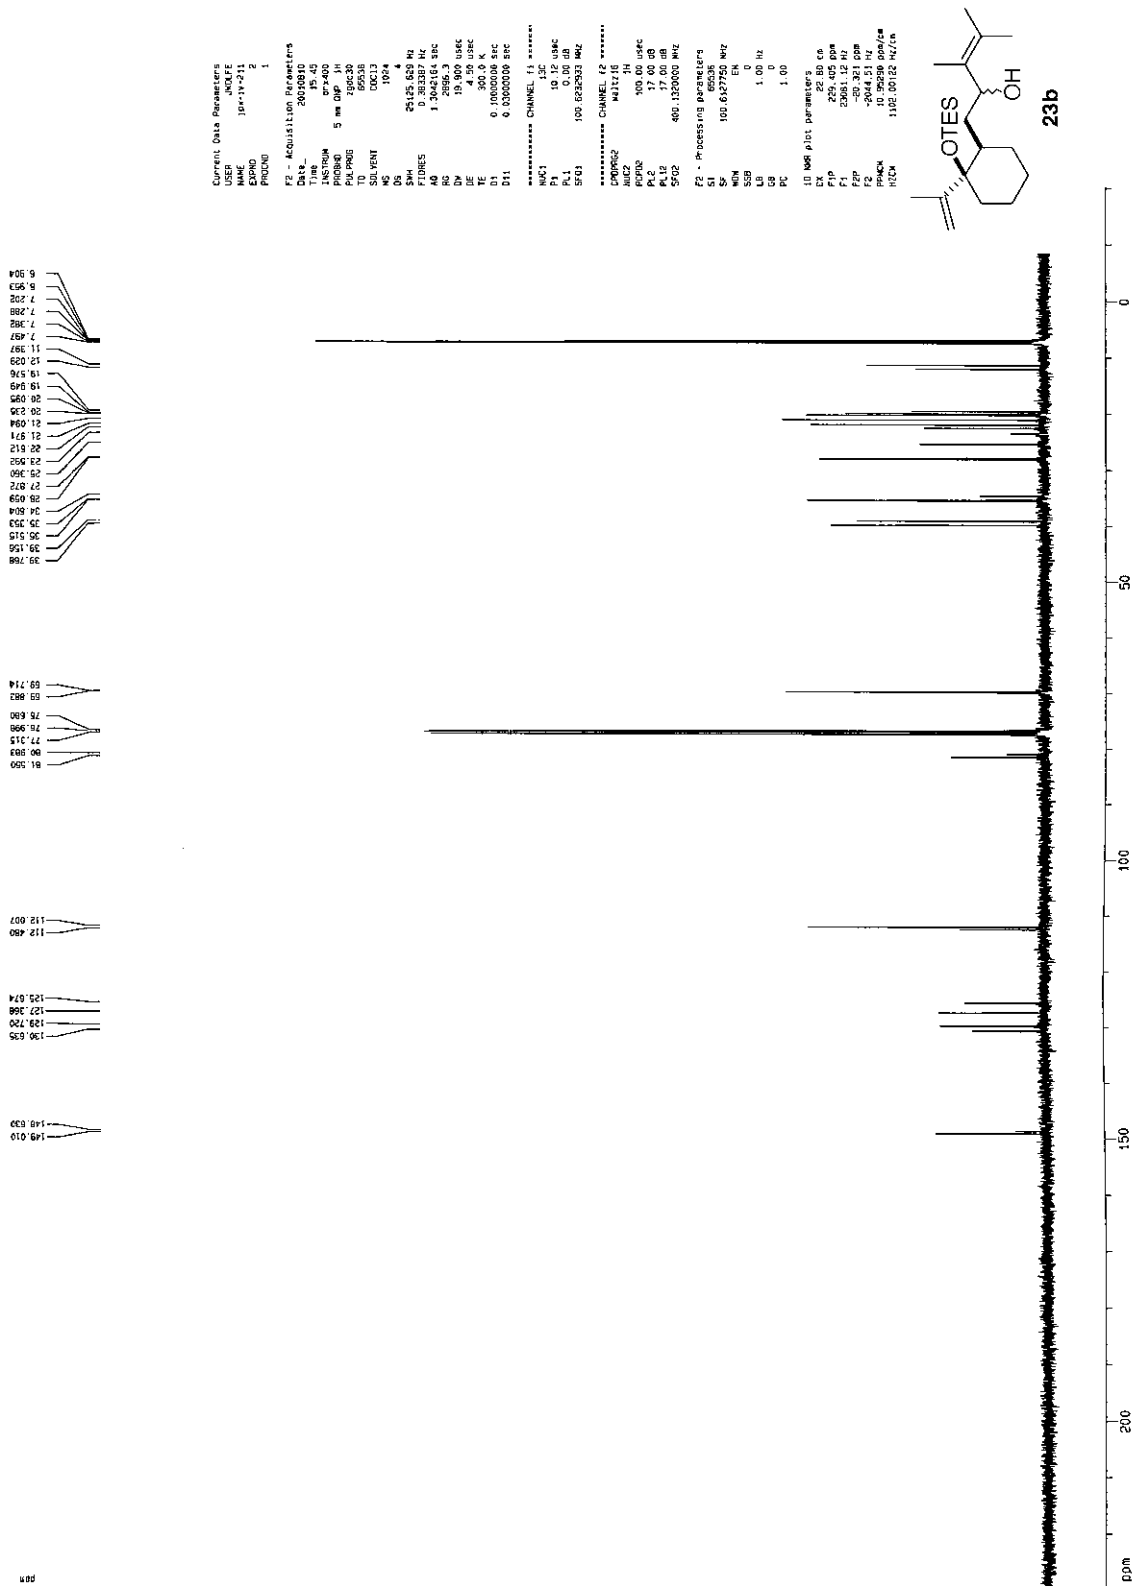

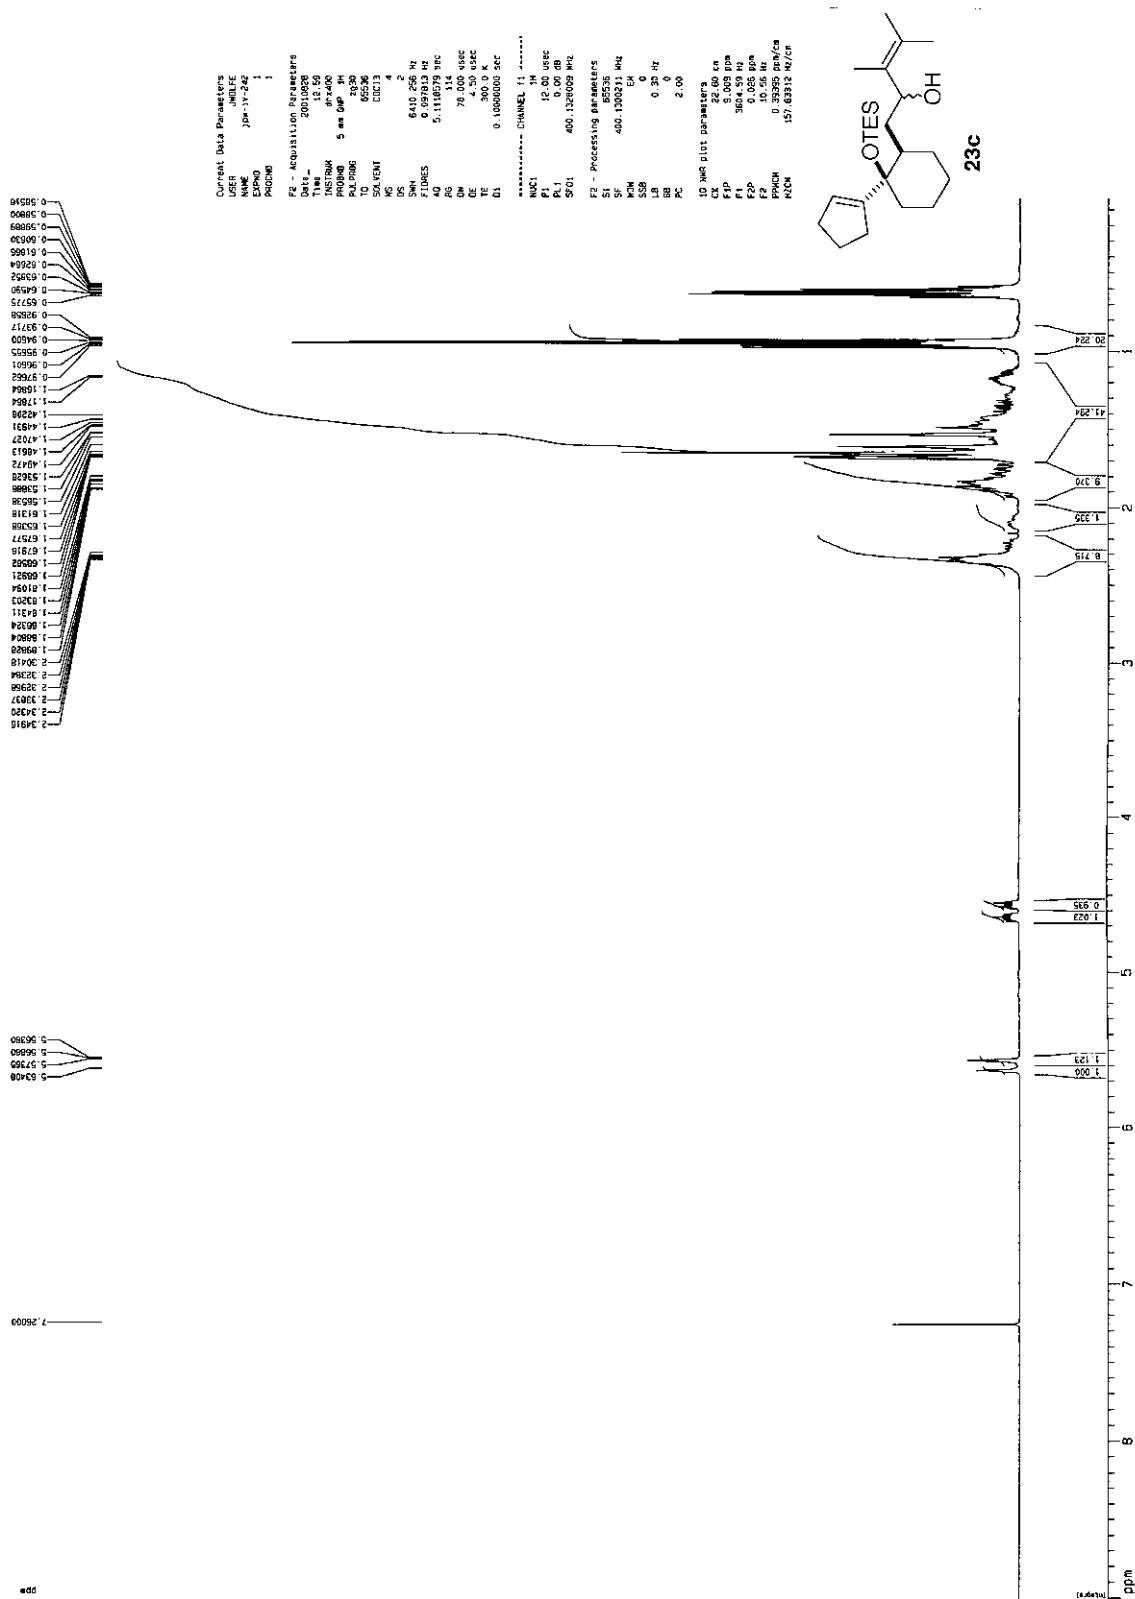

<sup>13</sup>C spectrum with <sup>1</sup>H decoupling

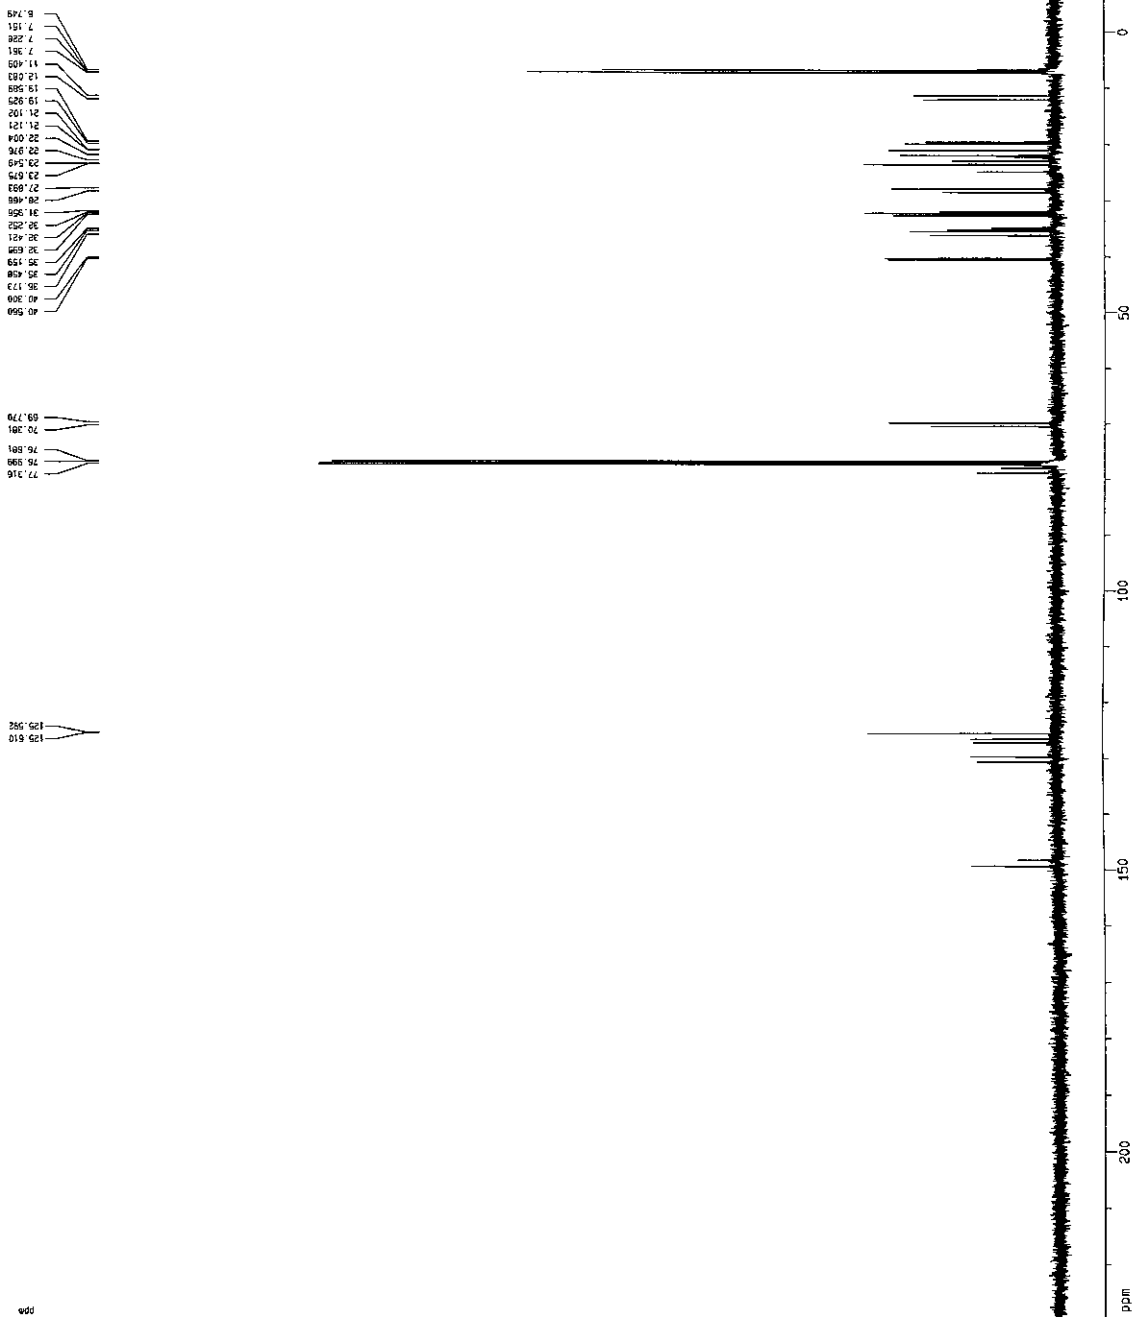

Current Data Parameters  
 USER JADLFE  
 JLABOR 104-11-2012  
 EXNO 2  
 PROCNO 1

Acquisition Parameters  
 Date 20120828  
 Time 13.03  
 INSTRUM cryo400  
 CHANNEL1 400 MHz CPDPR02  
 PULPROG zgpg30  
 TO 59535  
 SOLVENT DMSO  
 DS 1000  
 SC 1000  
 SH 26125.620 Hz  
 FIDRES 0.383387 Hz  
 AQ 1.304216 sec  
 RG 655  
 DD 19.200 usec  
 DE 4.50 usec  
 ZG 300.0 K  
 ZD 0.000000 sec  
 D11 0.0300000 sec

===== CHANNEL 1 =====  
 NU1 1  
 P1 10.12 usec  
 PL1 0.00 dB  
 SFO1 100.626731 MHz

===== CHANNEL 2 =====  
 CPDPR02 w11z16  
 NU2 1  
 P2 100.00 usec  
 PL2 0.00 dB  
 SFO2 400.1326000 MHz

F2 - Processing parameters  
 SI 65536  
 SF 100.626731 MHz  
 DS 1000  
 SSF 0  
 LB 1.00 Hz  
 GB 0  
 PC 1.00

10 NMR 0101 parameters  
 C1 20.00 usec  
 PC1 0.00 dB  
 F1 200.000 MHz  
 F2 200.000 MHz  
 F3 200.000 MHz  
 F4 200.000 MHz  
 F5 200.000 MHz  
 F6 200.000 MHz  
 F7 200.000 MHz  
 F8 200.000 MHz  
 F9 200.000 MHz  
 F10 200.000 MHz

<sup>1</sup>H spectrum

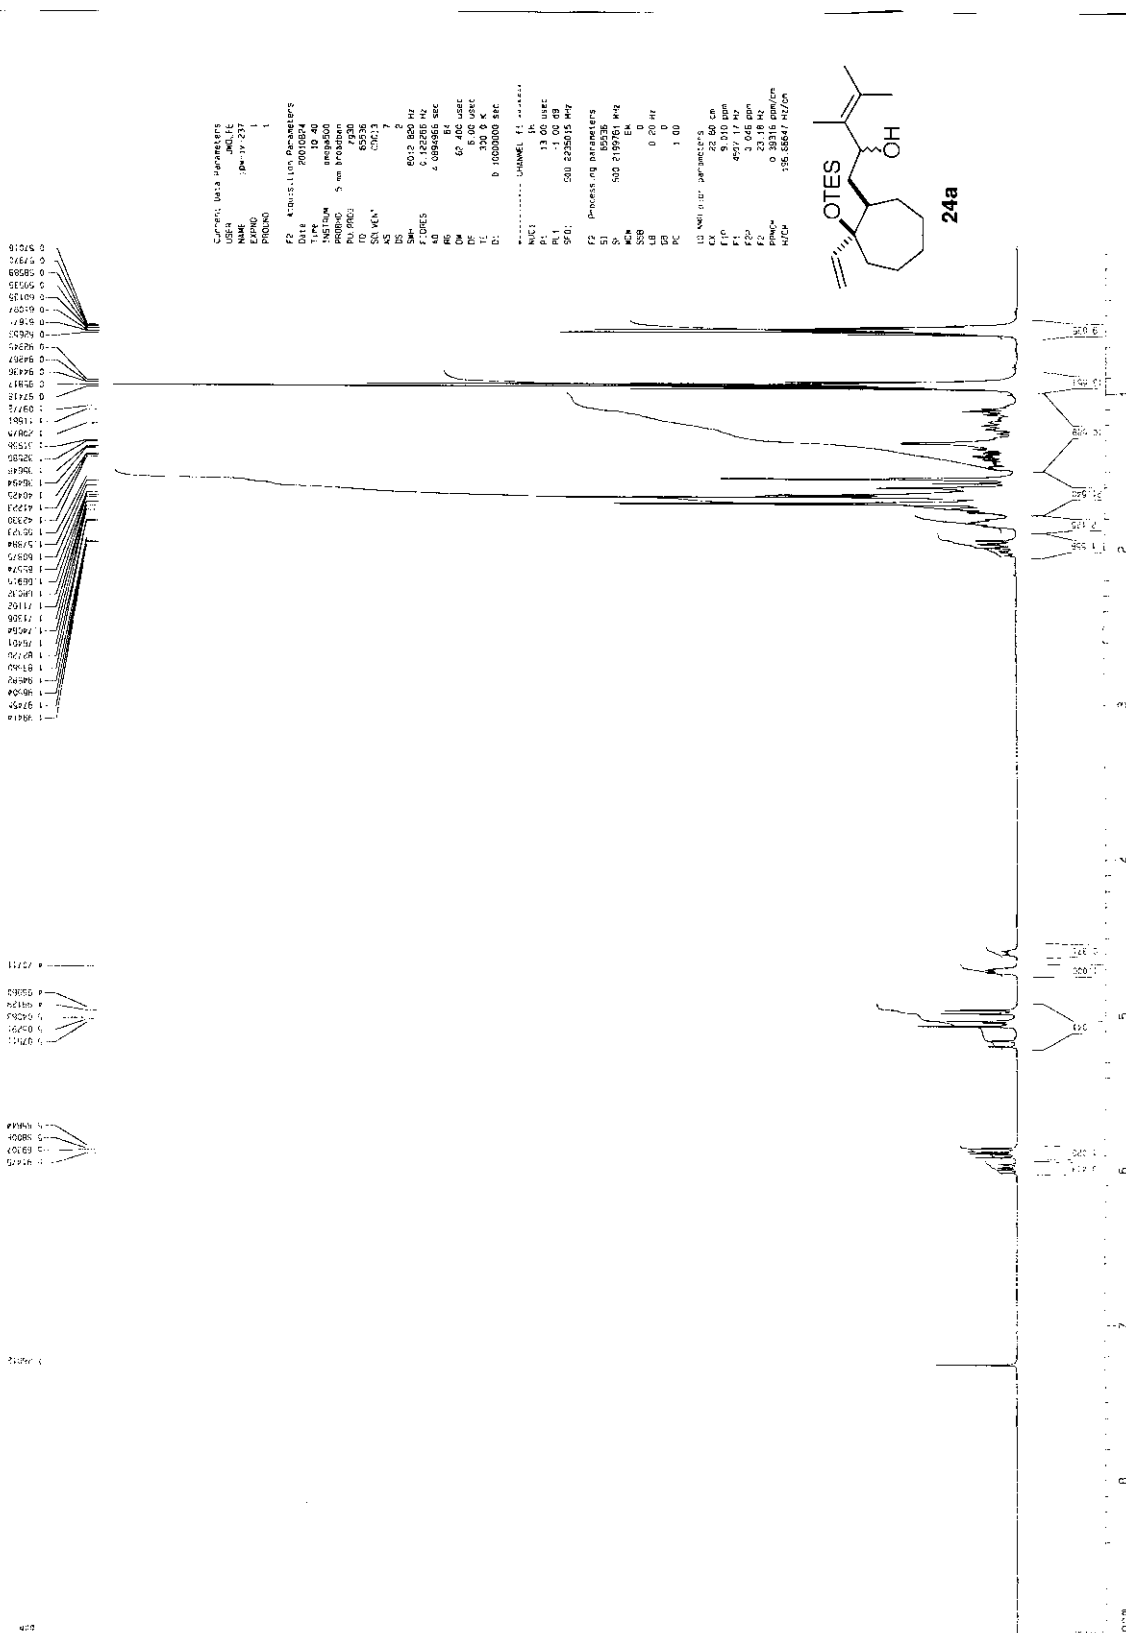



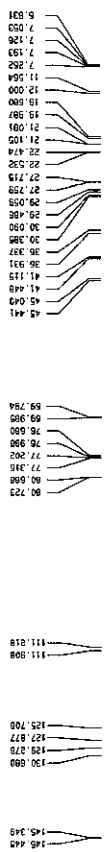

Current Data Parameters  
USER JML/FE  
NAME 18-11-237  
PROCNO 1  
PRTNO 1

F2 - Acquisition Parameters  
Date\_ 20100821  
Time 11:47  
INSTRUM grx400  
PROBHD 5 mm DRG-31  
PULPROG zgpg30  
TD 65536  
SOLVENT CDCl3  
NS 669  
DS 2  
SWH 29125.020 MHz  
FIDRES 0.38987 Hz  
AQ 1.3042164 SEC  
RG 327.5  
BW 18.900 MHz  
DE 4.50 Usec  
TE 300.0 K  
D1 0.10000000 SEC  
D11 0.10000000 SEC

\*\*\*\*\* CHANNEL f1 \*\*\*\*\*  
NUC1 13C  
P1 16.00 Usec  
PL1 0.00 dB  
SFO1 100.626263 MHz

\*\*\*\*\* CHANNEL f2 \*\*\*\*\*  
COPROG2 waltz16  
NUC2 1H  
P2 10.00 Usec  
PL2 0.00 dB  
PC12 17.00 dB  
SFO2 400.152000 MHz

F2 - Processing parameters  
SI 65536  
SF 100.6187731 MHz  
WDW EM  
SSB 0  
LB 1.00 Hz  
GB 0  
PC 1.00

ID NH1 plot parameters  
C1 22.80 cm  
F1 2000.00 Hz  
F2 -20.301 ppm  
P1 2042.69 Hz  
P2 10.9580 Hz  
N1 112.00172 Hz  
N2

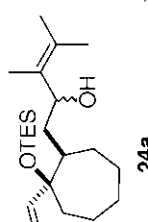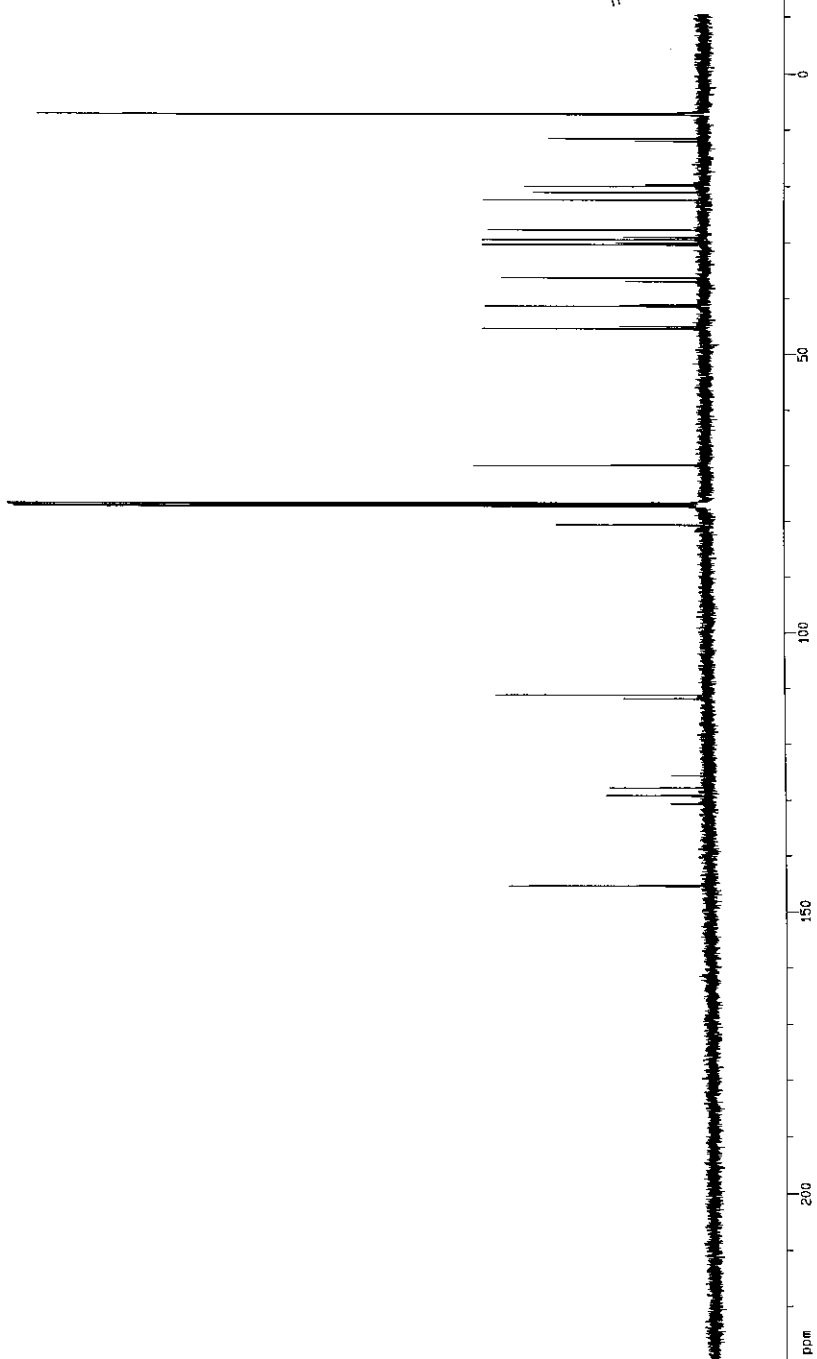

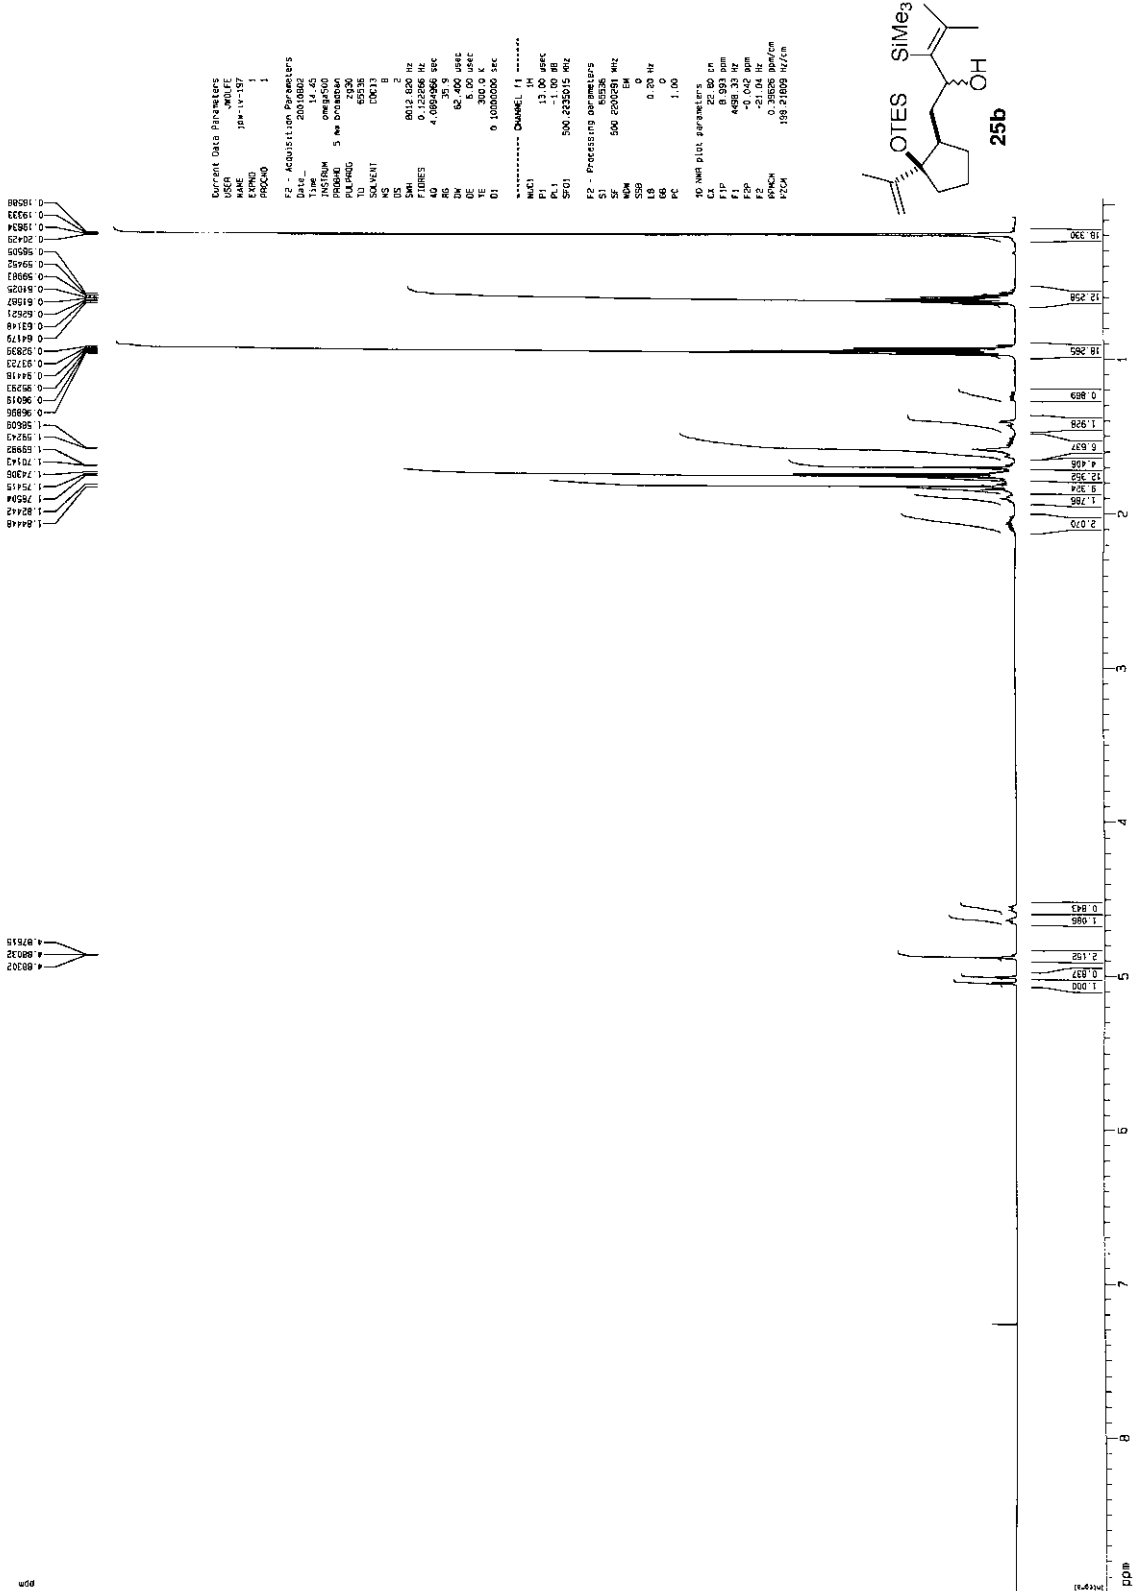

<sup>13</sup>C spectrum with <sup>1</sup>H decoupling

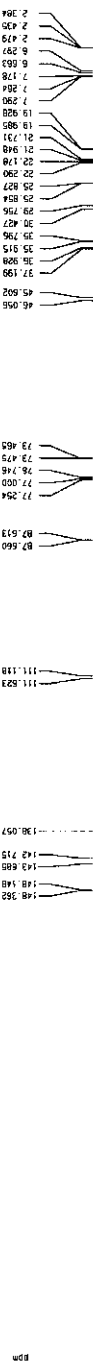

Current Data Parameters  
 NAME: j101-11-197  
 EXPNO: 2  
 PROCNO: 1  
 F2 - Acquisition Parameters  
 Date\_ : 20010802  
 Time : 14.48  
 Operator : dmh  
 PULPROG : zgpg30  
 PROBHD : 5 mm ZBG30  
 TO : 58536  
 SOLVENT : CDCl3  
 DS : 4  
 SWH : 30000.031 Hz  
 FIDRES : 0.402388 Hz  
 AQ : 1.364918 sec  
 RG : 3249.1  
 DM : 16.500 usec  
 DE : 2.50 usec  
 O1 : 0.2500000 sec  
 O2 : 0.2500000 sec  
 O3 : 0.2500000 sec  
 O4 : 0.2500000 sec  
 \*\*\*\*\* CHANNEL f1 \*\*\*\*\*  
 NUCL1 : <sup>13</sup>C  
 P1 : 11.00 usec  
 PL1 : -3.00 dB  
 SFO1 : 125.760400 MHz  
 \*\*\*\*\* CHANNEL f2 \*\*\*\*\*  
 DPROG2 : MZT215  
 PULPROG : zgpg30  
 PSF2 : 80.00 usec  
 R2 : 120.00 dB  
 SFO2 : 500.253013 MHz  
 F2 - Processing parameters  
 SI : 65536  
 SF : 125.760400 MHz  
 KW : 64  
 LB : 0  
 GB : 0  
 PC : 1.00  
 1D NMR plot parameters  
 F1 : 230.005 GHz  
 F2 : 28030.12 Hz  
 F3 : -10.915 GHz  
 SFO : 101.626370 MHz  
 HZCX : 1.328 00032 Hz/cm

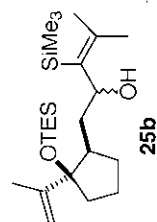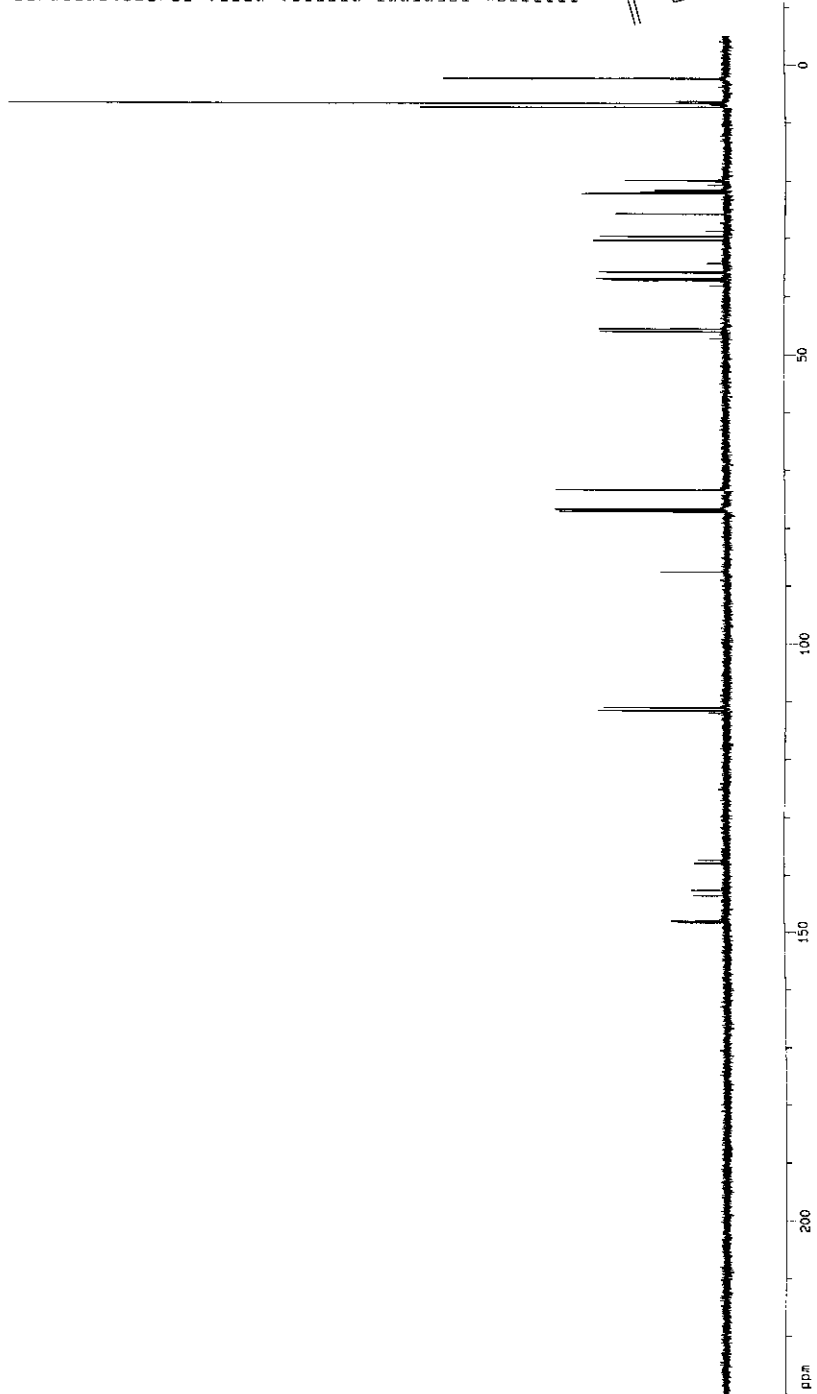

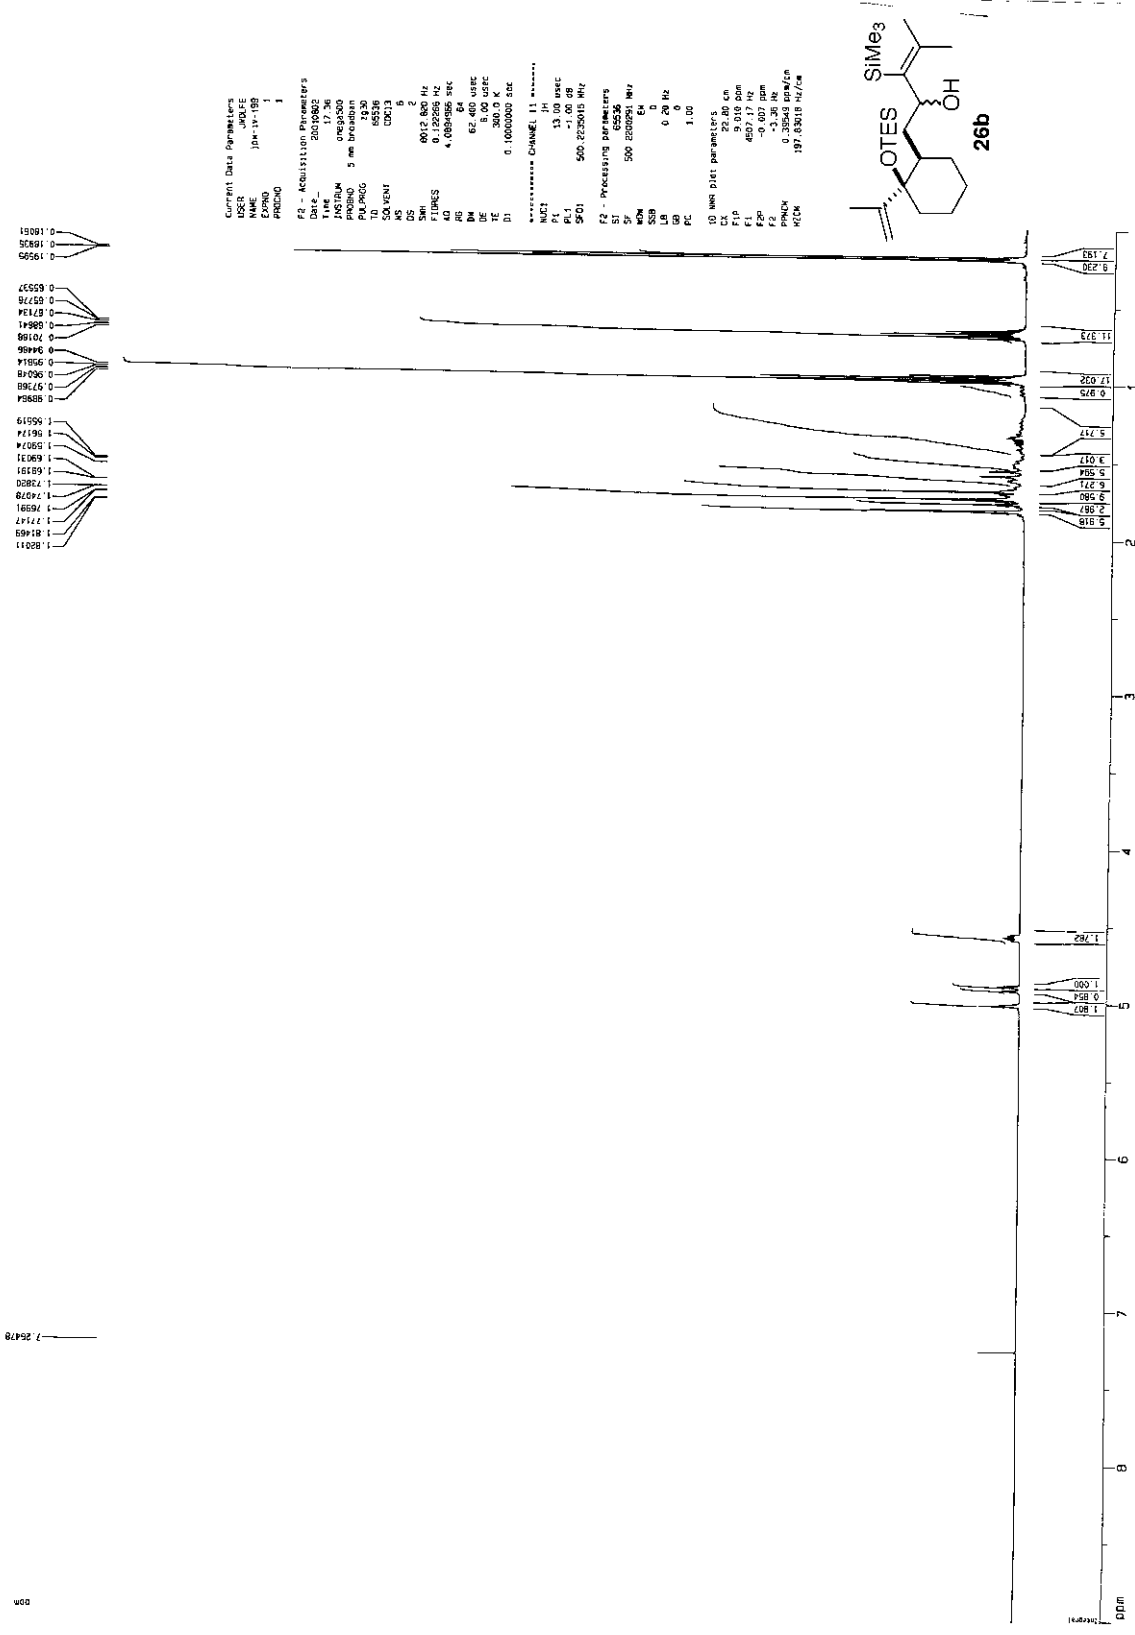

<sup>13</sup>C spectrum with <sup>1</sup>H decoupling

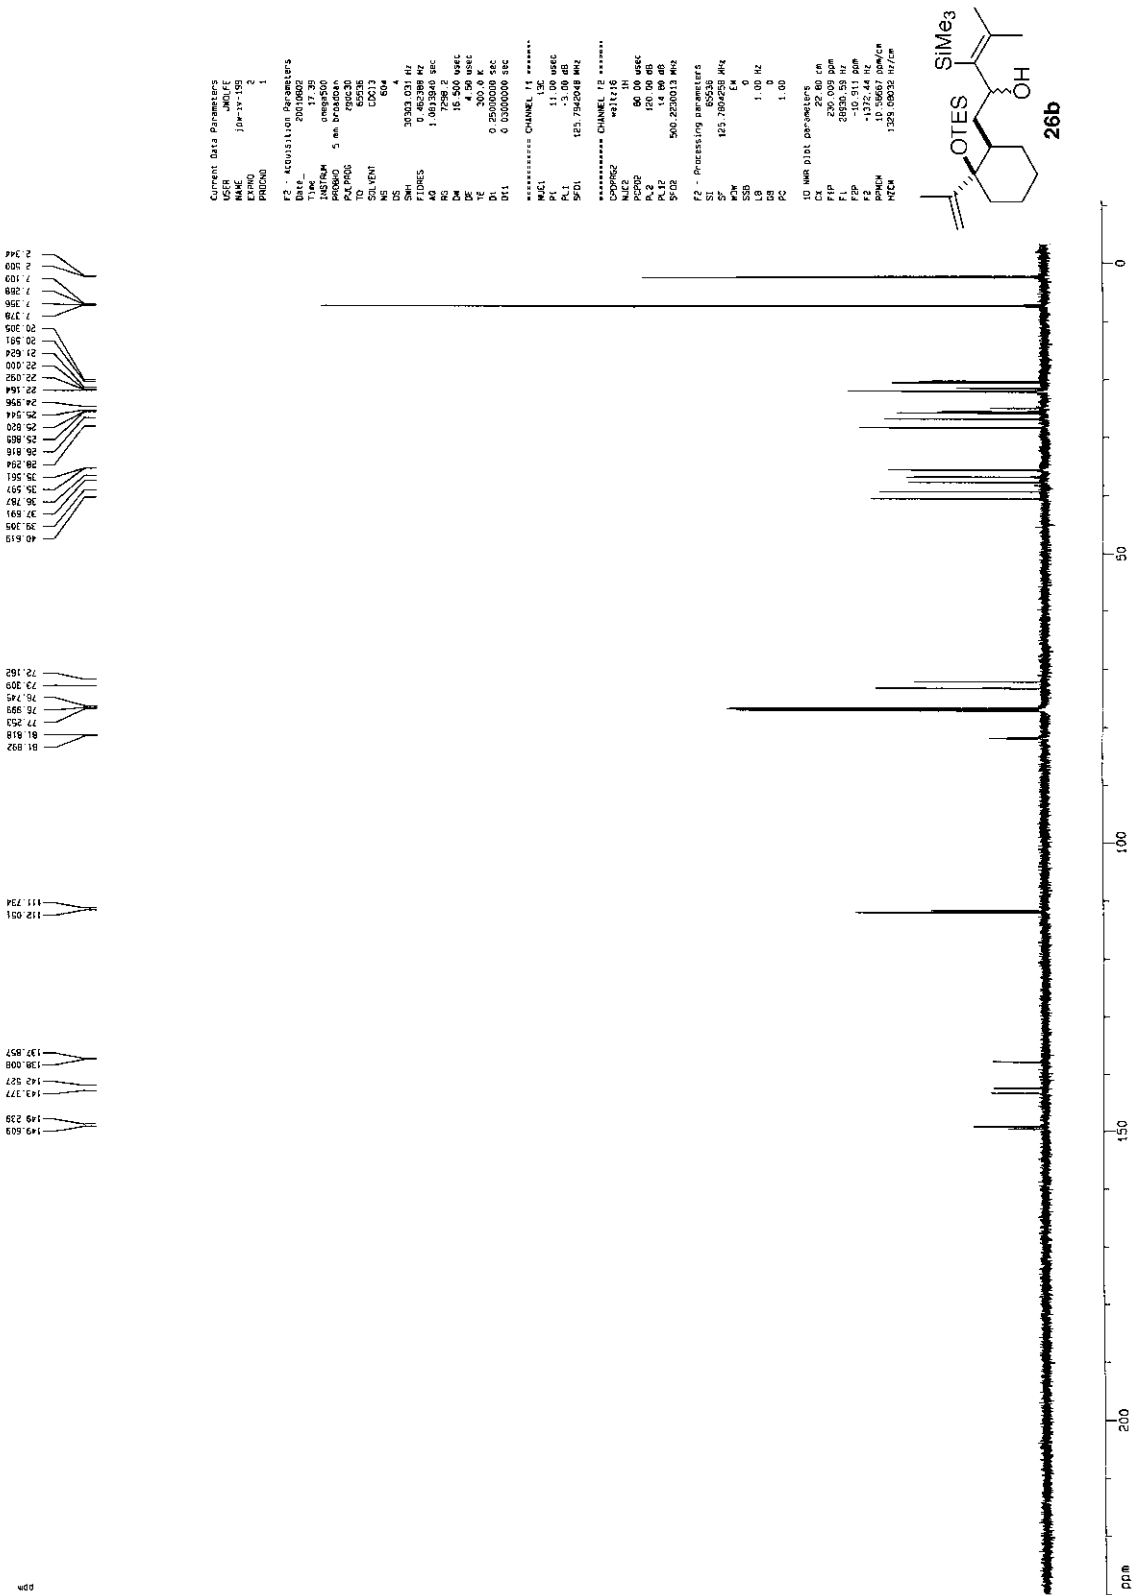

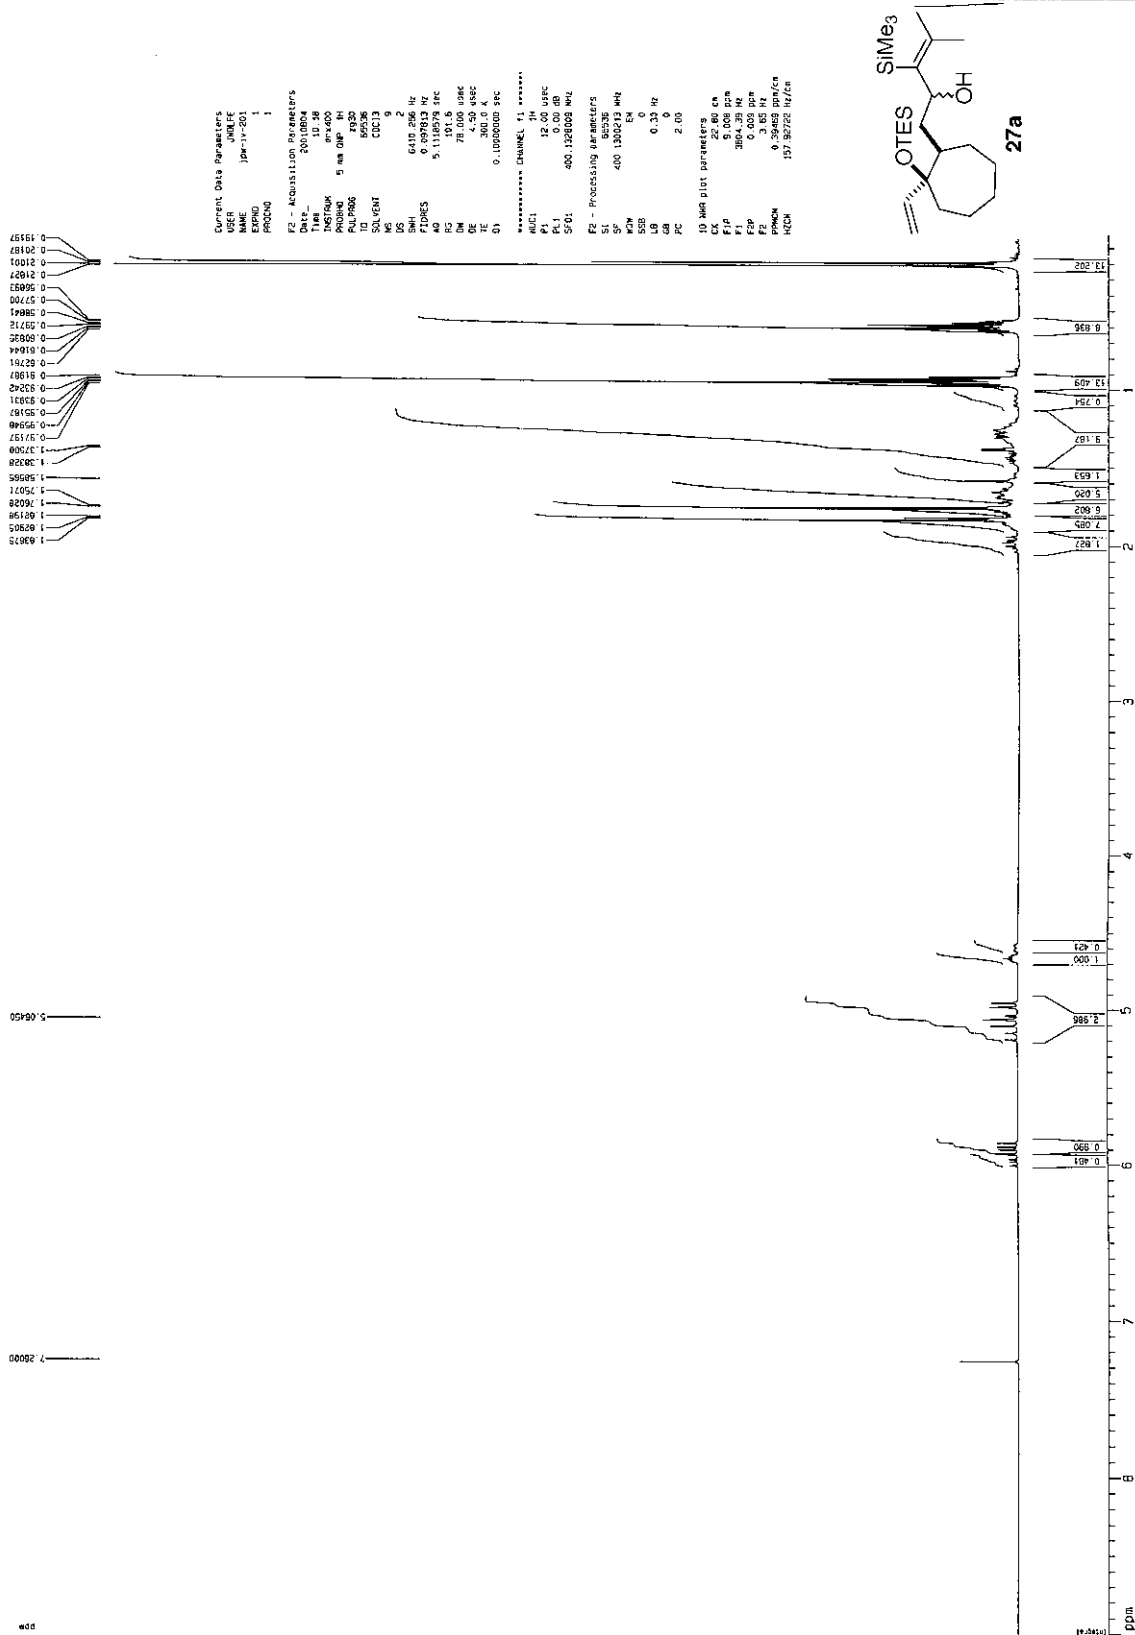

<sup>13</sup>C spectrum with <sup>1</sup>H decoupling

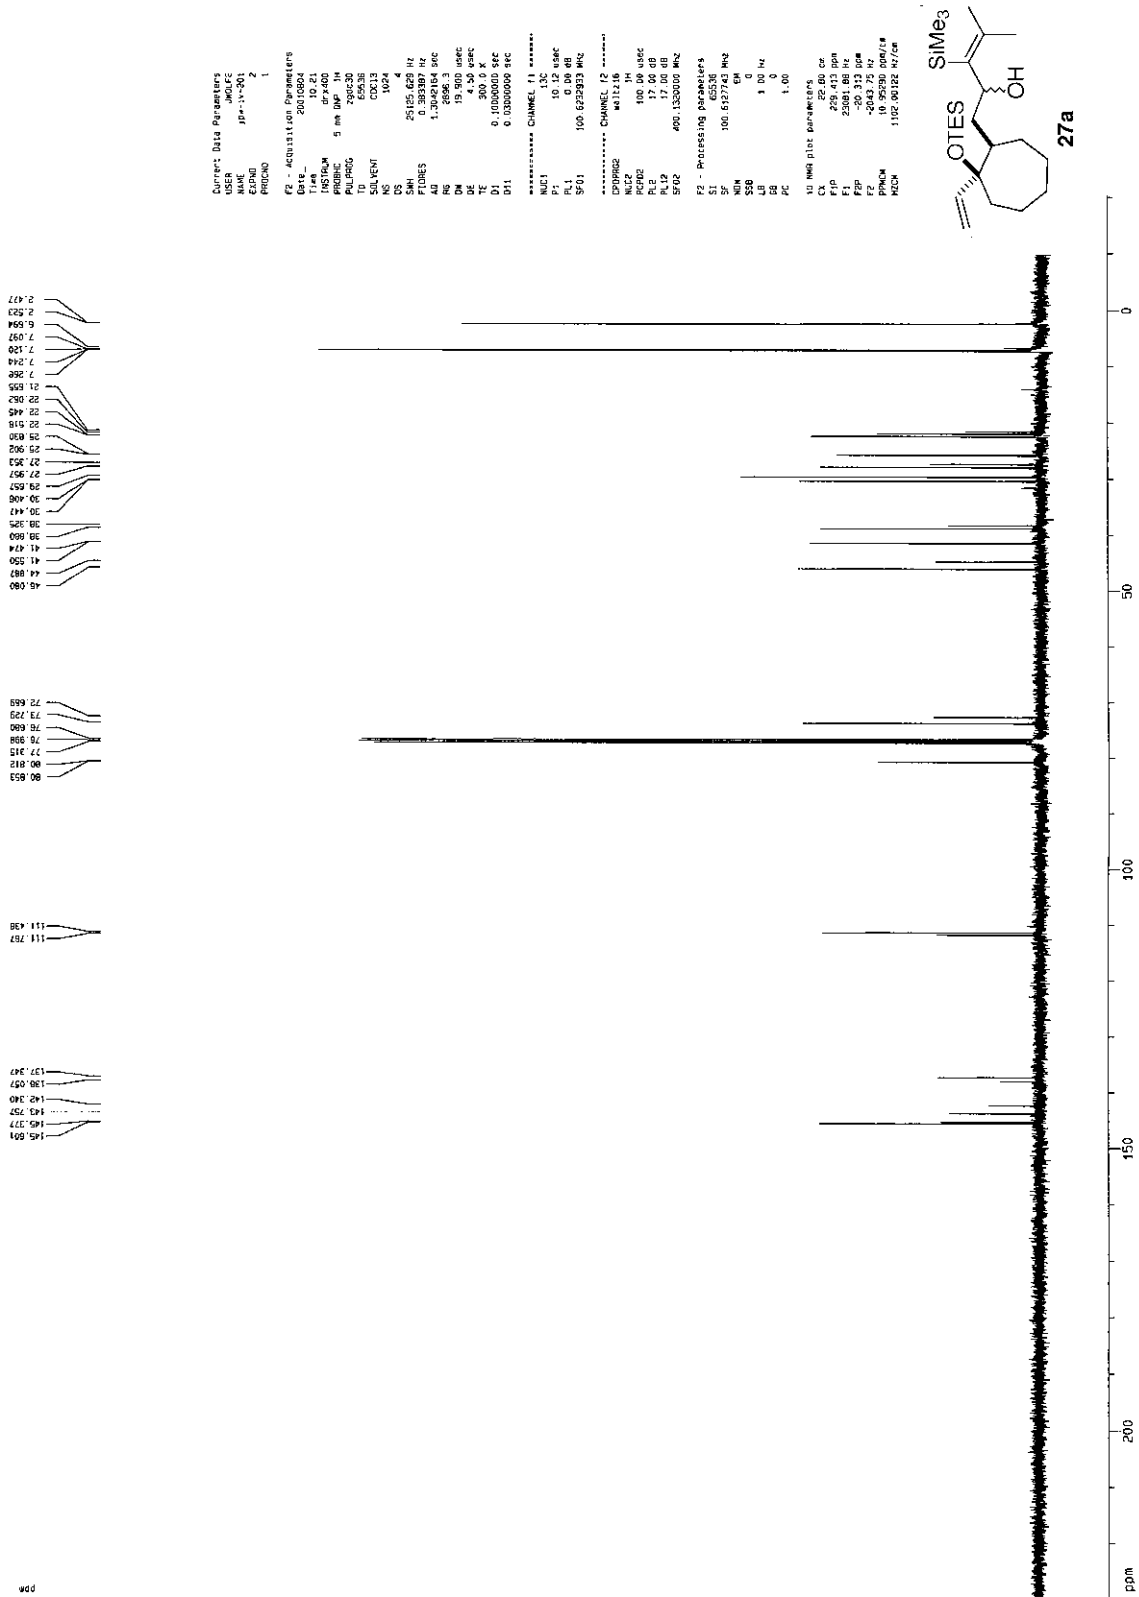

Current Data Parameters  
 USER JMOLEF  
 ACQNO 10  
 PRGNO 1  
 EXPNO 1  
 F2 - ACQUISITION PARAMETERS  
 CHAN1 101.623000 MHz  
 Time 10.12  
 INSTRUM spect  
 PULPROG zgpg30  
 TO 25.000000 sec  
 SOLVENT CDCl3  
 NS 1024  
 SM 25125.620 Hz  
 FIDRES 0.3883807 Hz  
 AQ 1.30029164 sec  
 SFO1 101.623000 MHz  
 DM 19.500 usec  
 DE 4.50 usec  
 TE 300.0 K  
 D1 0.10000000 sec  
 D11 0.10000000 sec  
 \*\*\*\*\* CHANNEL f1 \*\*\*\*\*  
 NU1 1  
 PL1 0.00 usec  
 PL2 0.00 usec  
 PL3 0.00 usec  
 SFO1 100.623000 MHz  
 \*\*\*\*\* CHANNEL f2 \*\*\*\*\*  
 CHPROG2 mzg32.16  
 NU2 1  
 PL2 19.50 usec  
 PL3 17.00 usec  
 SFO2 400.1330000 MHz  
 F2 - PROCESSING PARAMETERS  
 SI 65536  
 SF 100.623743 MHz  
 EQ 0  
 SN 0  
 LB 1.00 Hz  
 GB 0  
 PC 1.00  
 10 MHz (1st) PARAMETERS  
 CX 22.80 cm  
 F1 25.413 ppm  
 F2 25.413 ppm  
 F3 25.413 ppm  
 F4 25.413 ppm  
 F5 25.413 ppm  
 F6 25.413 ppm  
 PPM0 10.9599 ppm  
 PPM1 110.0012 ppm  
 PPM2 110.0012 ppm

1 spectrum

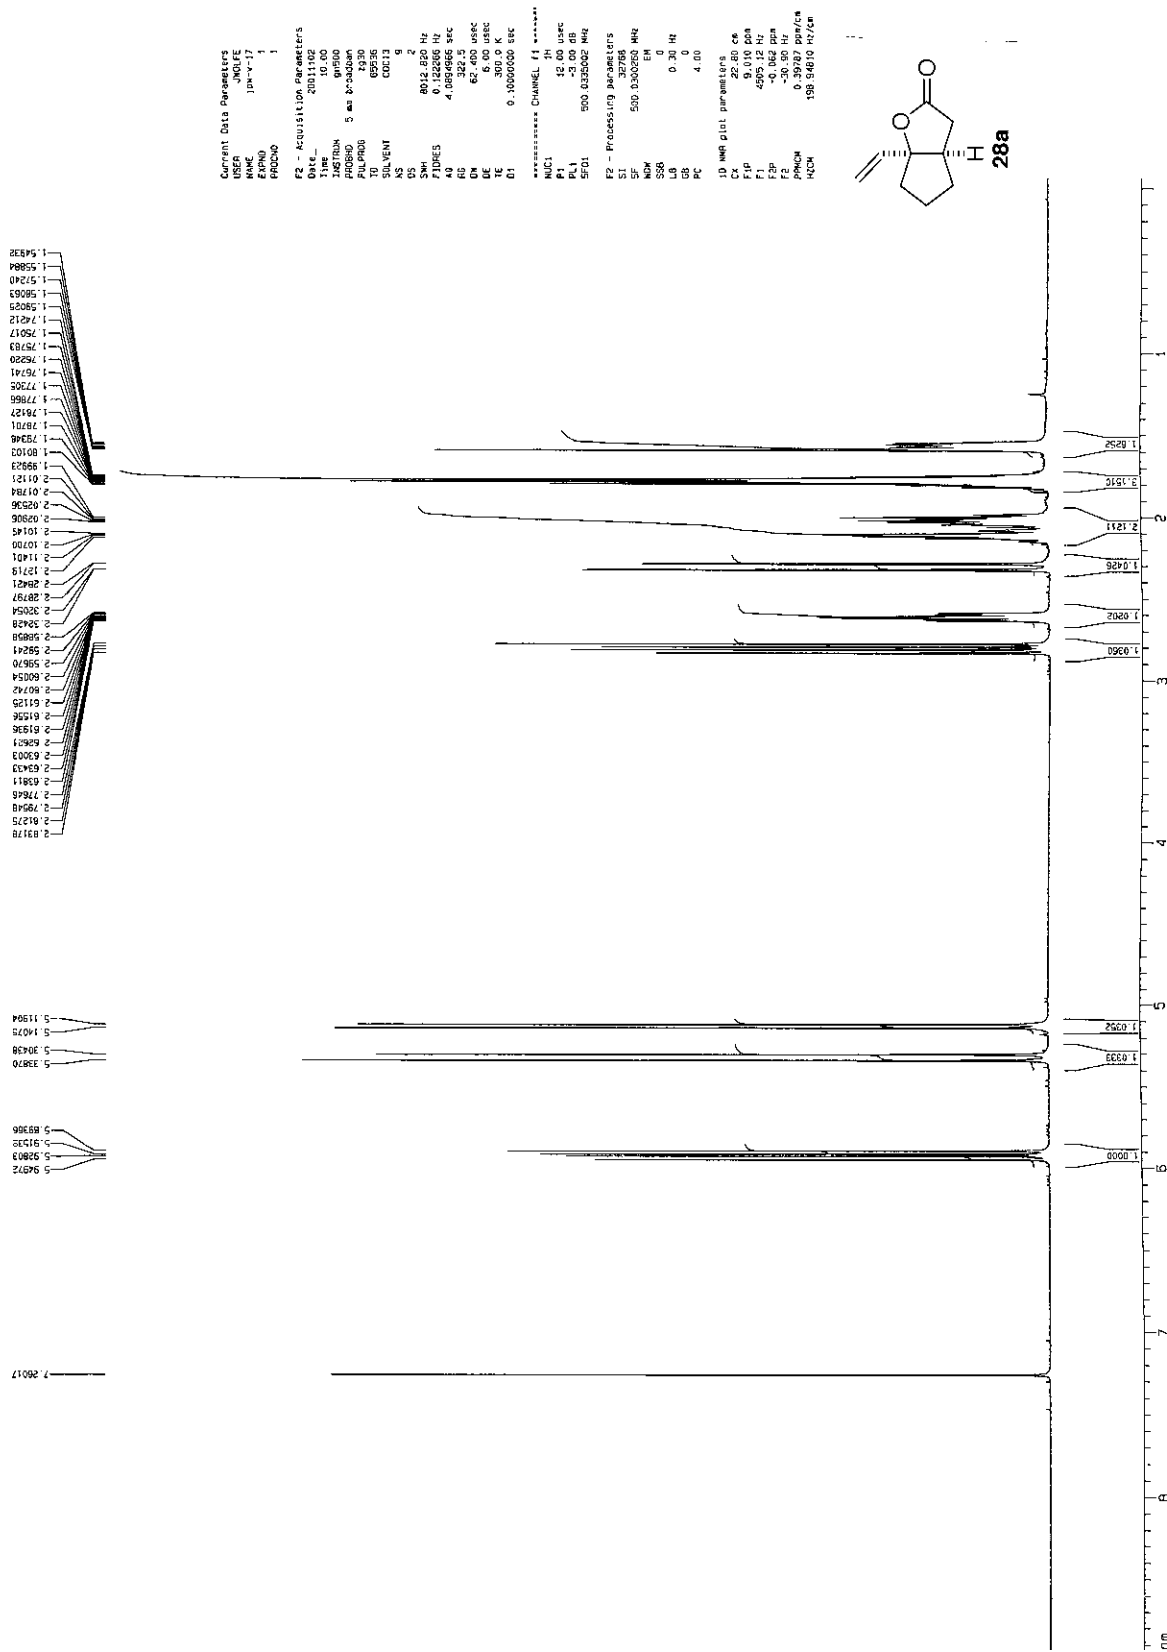



13C spectrum with 1H decoupling

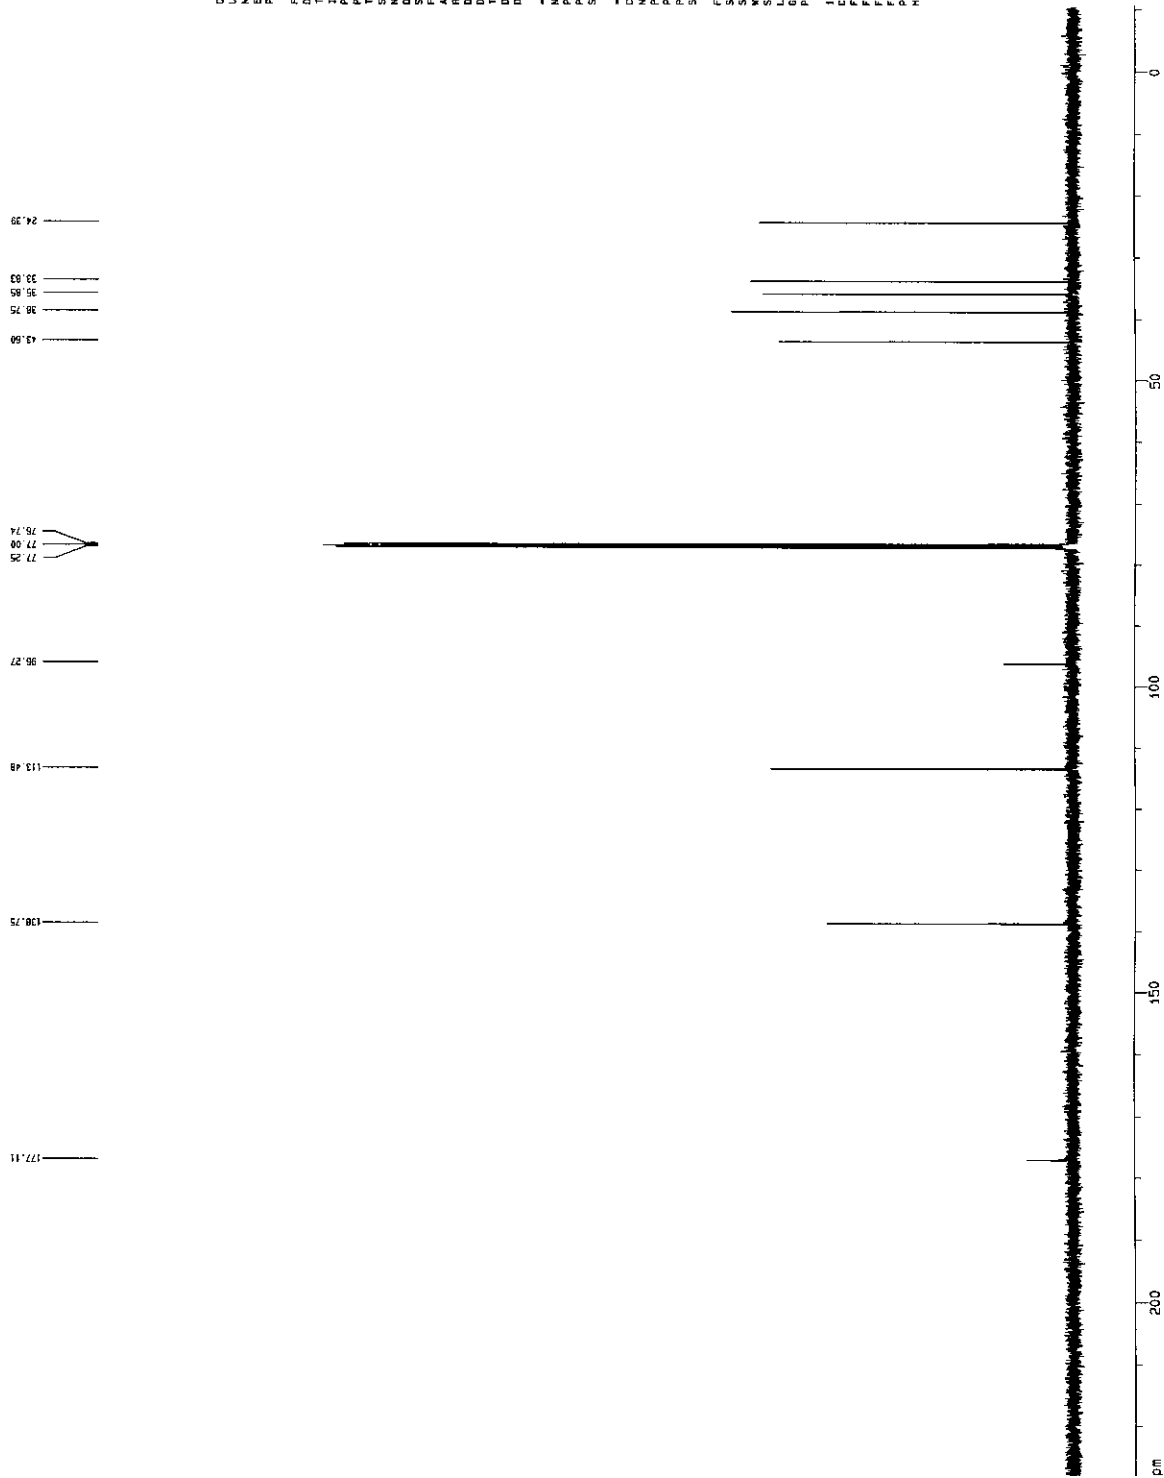

Current Data Parameters  
 Date\_ 20011102  
 Time\_ 10.03  
 INSTRUM\_ spect  
 PULPROG\_ zgpg30  
 TO\_ 65526  
 SOLVENT\_ CDCl3  
 NS\_ 513  
 DS\_ 4  
 SWH\_ 30903.031 Hz  
 FIDRES\_ 0.462389 Hz  
 AQ\_ 1.0613940 sec  
 RG\_ 327.500  
 BN\_ 15.500 USEC  
 DE\_ 4.30 USEC  
 TE\_ 300.0 K  
 D1\_ 0.2500000 sec  
 D11\_ 0.0200000 sec

\*\*\*\*\* CHANNEL 1 \*\*\*\*\*  
 NU1\_ 13C  
 P1\_ 6.00 USEC  
 PL1\_ 0.00 dB  
 SF01\_ 125.762466 MHz

\*\*\*\*\* CHANNEL 2 \*\*\*\*\*  
 CPDPRG2\_ waltz16  
 NU2\_ 1H  
 P1P1P2\_ 80.00 USEC  
 PL1\_ -3.00 dB  
 PL2\_ 19.00 dB  
 SF02\_ 500.0234002 MHz

F2 - Processing parameters  
 SI\_ 65526  
 SF\_ 125.762466 MHz  
 WDW\_ EM  
 SSB\_ 0  
 LB\_ 1.00 Hz  
 GB\_ 0  
 PC\_ 2.00

ID MR plot parameters  
 CA\_ 232.827  
 CB\_ 232.827  
 F1\_ 088163.56 Hz  
 F2\_ -10.765 ppm  
 GAMMA\_ 1.000000000  
 GAMMA2\_ 1.000000000  
 NU1CN\_ 1329.08632 Hz/cm

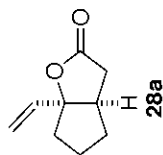

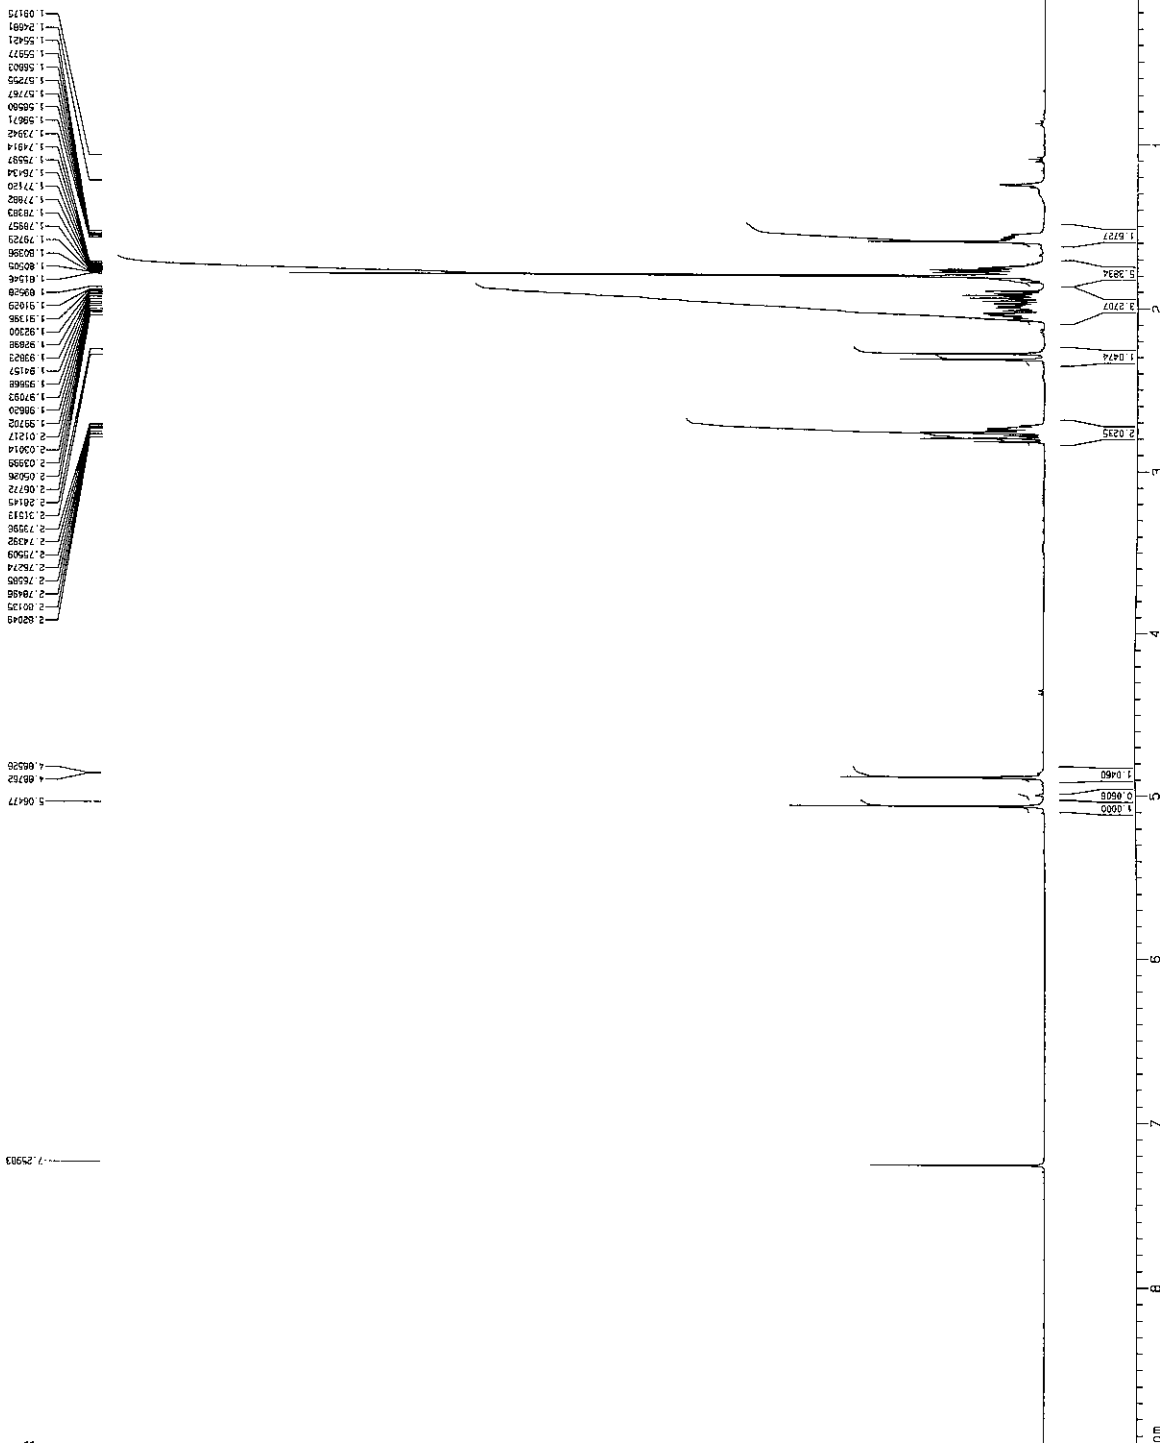

Current Data Parameters  
 USER JMOUFC  
 SAMPLE J144-2130w  
 EXPNO 1  
 PROCNO 1  
 F2 - Acquisition Parameters  
 Date\_ 20080814  
 Time 14:21  
 INSTRUM spect  
 PULPROG zgpg30  
 PREPBD 5 sec DRODRAIN  
 AFTPROG TD  
 TO 65330  
 SOLVENT CDCl3  
 NS 8  
 DS 2  
 SWH 8632.800 Hz  
 FIDRES 0.122288 Hz  
 AQ 4.089486 sec  
 RG 329.1  
 DELTAT 0.000000 sec  
 DEC 6.000000 usec  
 TE 300.2 K  
 D1 0.10000000 sec  
 \*\*\*\*\* CHANNEL f1 \*\*\*\*\*  
 NUC1 1H  
 P1 12.00 usec  
 PL1 -3.00 dB  
 SFO1 500.032000 MHz  
 F2 - Processing parameters  
 SI 32768  
 SF 500.030000 MHz  
 WDW EM  
 SSB 0  
 LB 0.30 Hz  
 GB 0  
 PC 4.00  
 10 NMR PLOT PARAMETERS  
 CX 22.80 cm  
 CY 1.00 cm  
 F1 45.250000 MHz  
 F2 -0.146000 MHz  
 F3 -23.05 Hz  
 FWHM 0.39767 ppm/cm  
 RDCM 198.31610 Hz/cm

13C spectrum with 1H decoupling

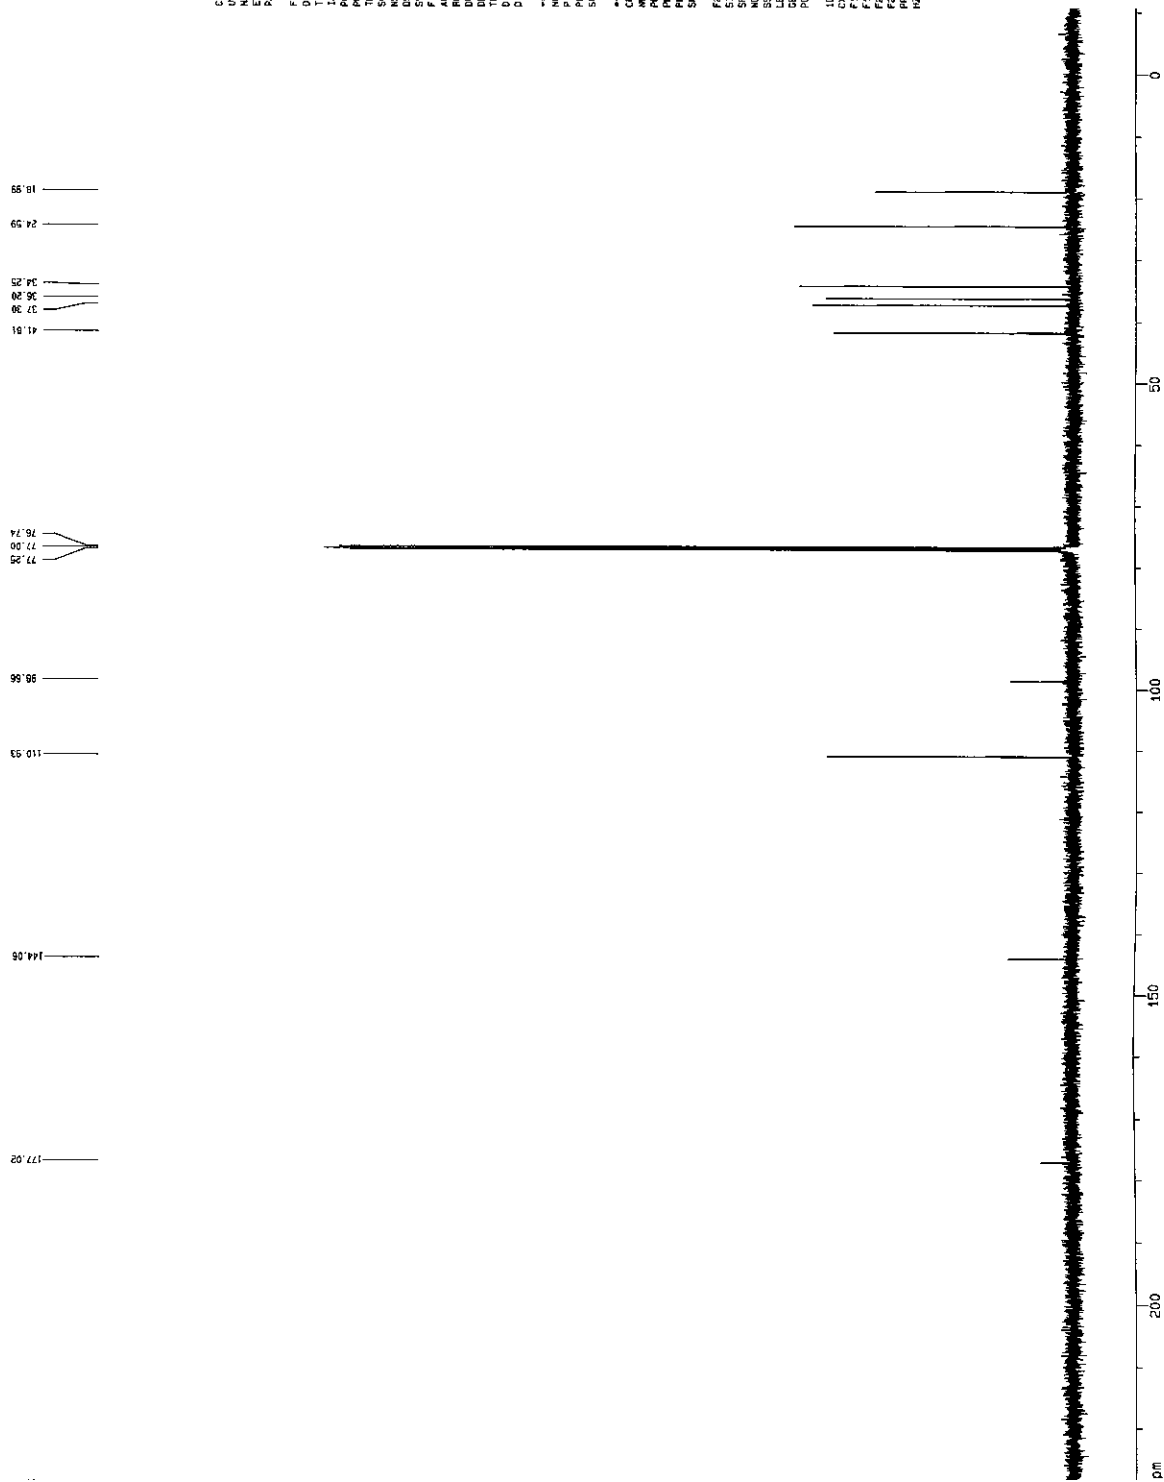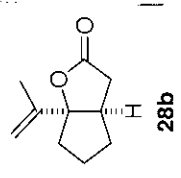

Current Data Parameters  
 NAME jany-31306  
 EXPNO 2  
 PROCNO 1  
 F2 - Acquisition Parameters  
 Date\_ 20011022  
 Time 14.24  
 NUC1 13C  
 PULPROG zgpg30  
 SPECTRUM 5 em b-  
 AQUEOUS  
 TO 655.36  
 SOLVENT CDCl3  
 NS 463  
 DS 2  
 SWH 30303.031 Hz  
 FIDRES 0.4622868 Hz  
 AQ 1.0012940 sec  
 RG 655  
 DM 18.500 USEC  
 DE 4.36 USEC  
 TE 300.2 K  
 D1 0.25000000 sec  
 D11 0.50000000 sec  
 \*\*\*\*\* CHANNEL f1 \*\*\*\*\*  
 NUC1 13C  
 P1 6.00 USEC  
 PL1 0.00 dB  
 SFO1 125.760466 MHz  
 \*\*\*\*\* CHANNEL f2 \*\*\*\*\*  
 CPDPRG2 waltz16  
 NUC2 1H  
 PULPROG 60.00 USEC  
 PL2 -3.00 dB  
 SFO2 500.0335002 MHz  
 F2 - Processing parameters  
 SI 32768  
 SF 125.760466 MHz  
 NDM 64  
 LB 1.00 Hz  
 GB 0  
 PC 2.00  
 ID MR plot parameters  
 EX 256  
 SI 256  
 CF 282.240 cm  
 F1 28948.63 Hz  
 F2 -10.772 ppm  
 F3 -1354.40 Hz  
 GAMMA 1.00000000  
 NUCL1 133.08033 Hz/cm

1H SPECTRUM

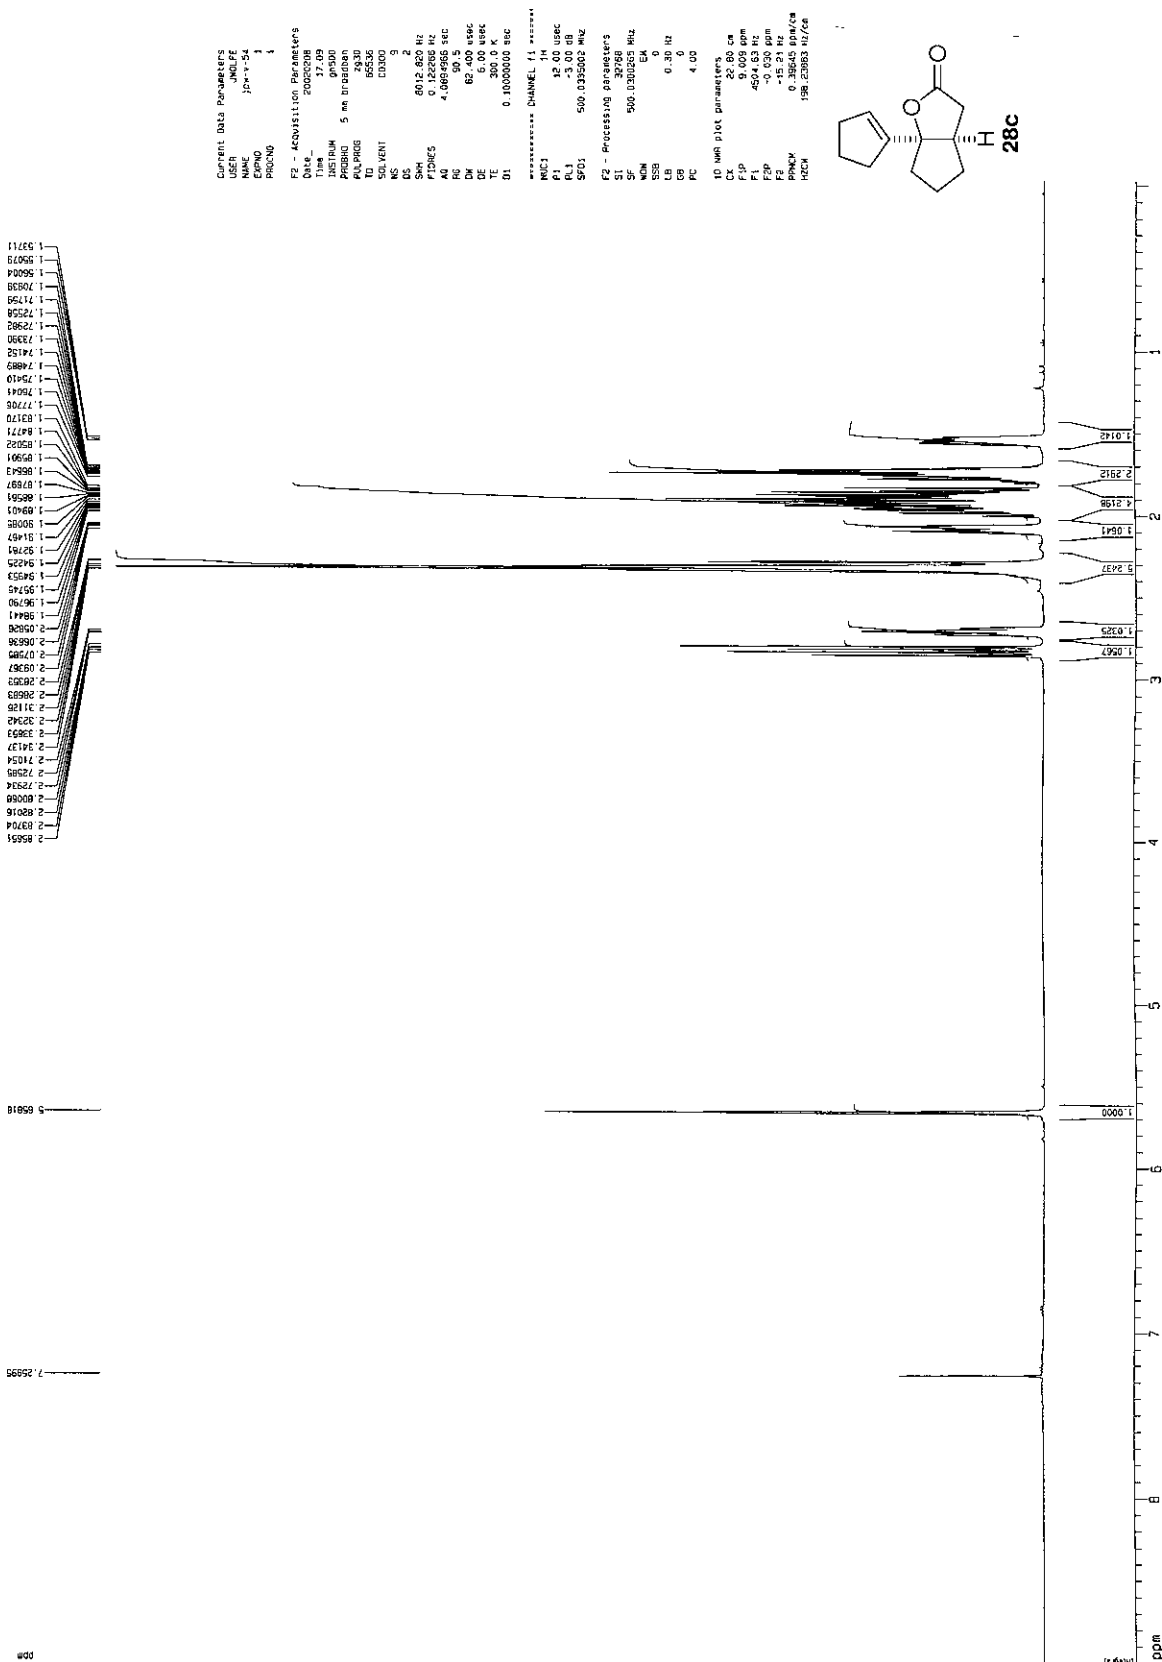

Current Data Parameters  
 Date\_ 20050208  
 Time 17.09  
 INSTRUM gnuco  
 PULPROG zgpg30  
 TD 65536  
 SOLVENT CDCl3  
 NS 2  
 DS 2  
 SMH 6012.620 HZ  
 FIDRES 0.122266 HZ  
 AQ 4.061995 SEC  
 RG 327.5  
 DK 62.400 KHZ  
 DE 6.00 KHZ  
 TE 300.2 K  
 D1 0.1000000 SEC

\*\*\*\*\* CHANNEL f1 \*\*\*\*\*  
 NUC1 1H  
 P1 12.00 USEC  
 PL 0.00 DB  
 SFO1 500.0335002 MHZ

F2 - Processing parameters  
 SI 327.5  
 SF 990.0330255 MHZ  
 WDM EK 0  
 SSB 0  
 GB 0.30 HZ  
 CB 0  
 PC 4.00

ID MHF plot parameters  
 CT 1  
 CP 0  
 FLP 0.009 ppm  
 F1 -4504.63 HZ  
 F2 -0.530 ppm  
 F3 -12.24 HZ  
 PR 0.1250000000  
 HZCM 198.23963 HZ/CM

```

Current Data Parameters
USER          JMK/EE
NAME         100-V-54
EXPNO        2
PROCNO       1

F2 - Acquisition Parameters
Date_        20020209
Time         17.12
INSTRUM     gds500
PROBHD      5 mm broadband
PULPROG     zgpg30
TD           65536
SOLVENT     CDCl3
CQ1         293
DS           2
SINH        30.83 0.31 Hz
FIDRES      0.462368 Hz
AQ          1.0813940 sec
RG          222.98 8
DM          16.500 USEC
DE          4.30 USEC
TE          300.0 K
D1          0.25000000 SEC
D11         0.03000000 SEC

***** CHANNEL f1 *****
NUC1         13C
P1           6.25 USEC
PL1          0.00 dB
SFO1        125.7654866 MHz

***** CHANNEL f2 *****
CPDPRG2     waltz16
NUC2         1H
P2           80.00 USEC
PL2          -3.00 dB
PL12        13.50 dB
SFO2        500.0350002 MHz

F2 - Processing parameters
SI           65536
SF          125.7655512 MHz
WDW         EM
SSB         0
LB          1.00 Hz
GB          0
PC          2.00

1D NMR Plot Parameters
CX          22.80 cm
F1P        230.162 ppm
F1         28936.93 Hz
F2P        -10.849 ppm
F2         -1364.10 Hz
FREQHM     0.57058 ppm/cg
RECWD      1325.86028 Hz/cg
    
```

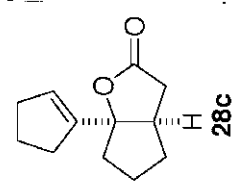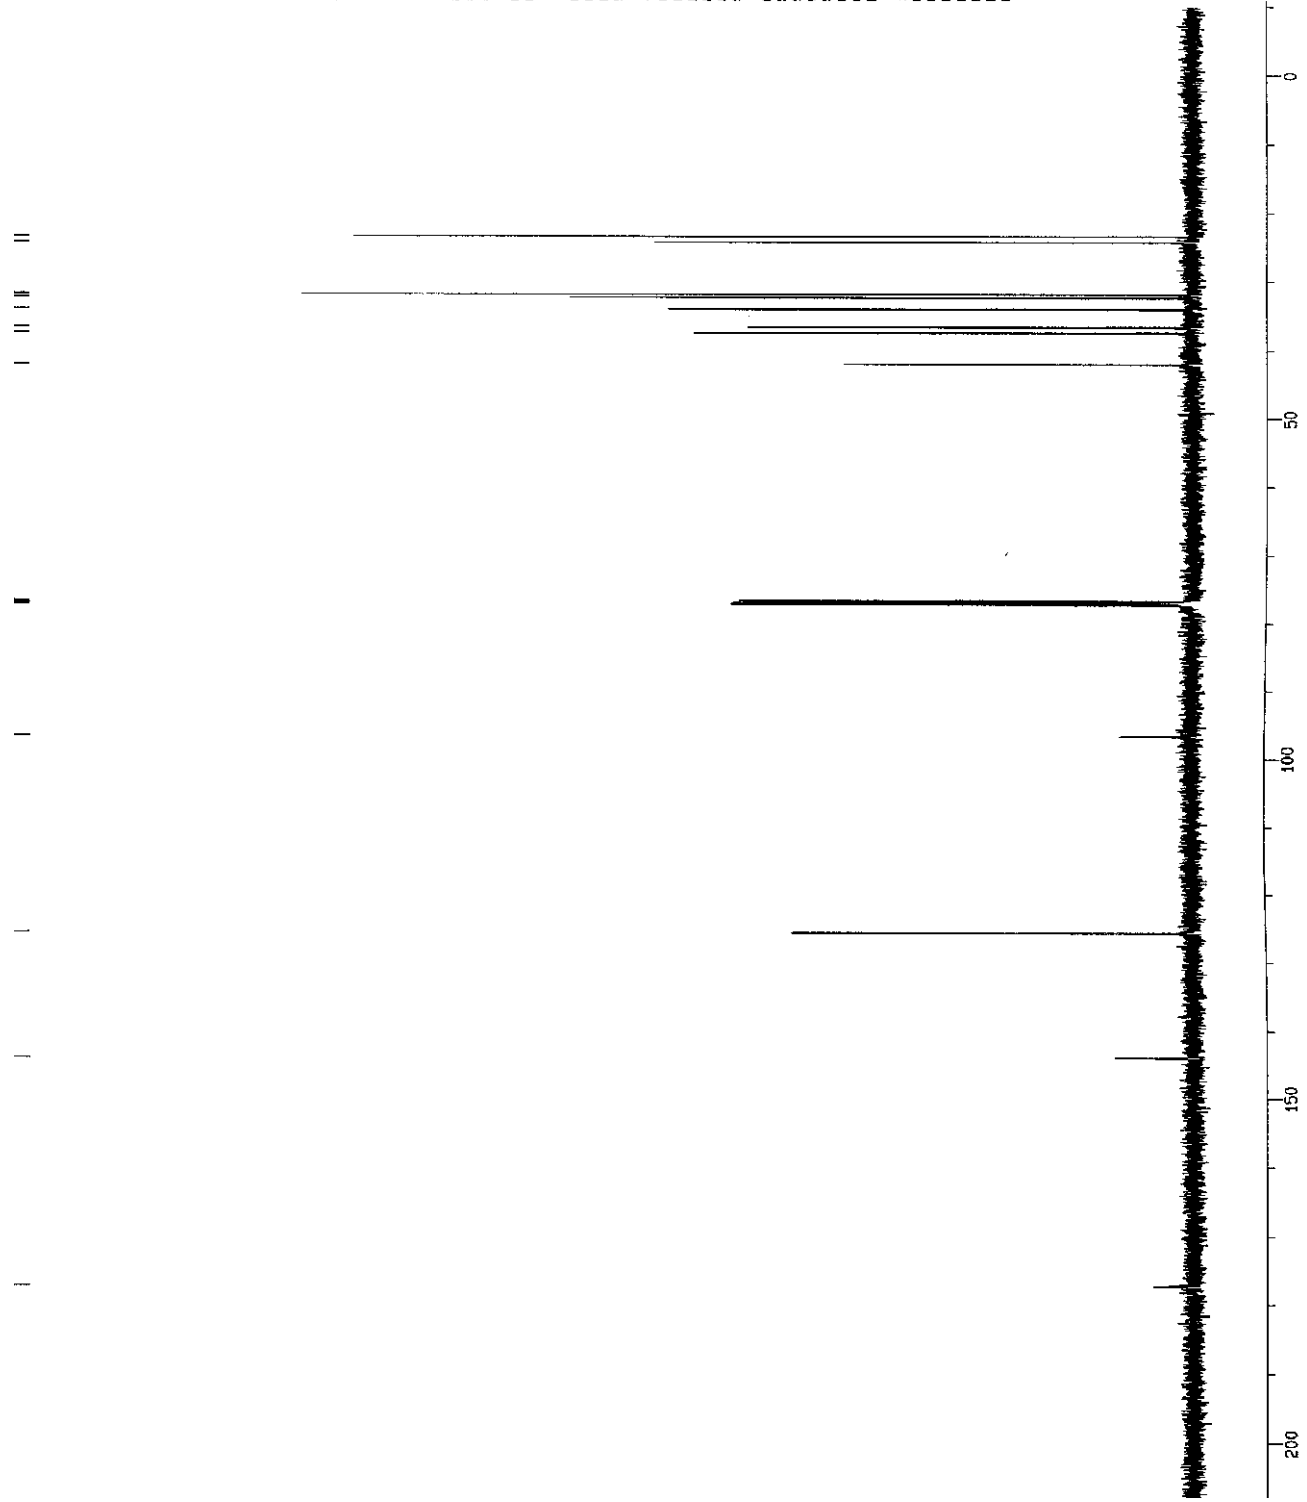

Current Data Parameters  
 USER JNDLFE  
 NAME 19w-11-2901de  
 EXPNO 1  
 PROCNO 1

F2 - Acquisition Parameters

Date\_ 20010529  
 Time 11.40  
 INSTRUM gmsdd  
 PULPROG 5 mm hrabpam  
 TD 65536  
 SOLVENT CDCl3  
 NS 8  
 DS 2  
 SWH 8012.820 Hz  
 FIDRES 0.132255 Hz  
 AQ 4.0894956 sec  
 RG 90.5  
 DM 62.400 usec  
 DE 5.00 usec  
 TE 300.0 K  
 O1 0.1000000 sec

\*\*\*\*\* CHANNEL F1 \*\*\*\*\*  
 NUCL1 1H  
 P1 12.00 usec  
 PL1 -3.00 dB  
 SFO1 500.0130012 MHz

F2 - Processing parameters

SI 32768  
 SF 500.0300258 MHz  
 WDW EM  
 SSB 0  
 LB 0.30 Hz  
 GB 0  
 PC 4.00

10 NMR D101 parameters

CV 22.80 cm  
 FIP 5.000 cm  
 F1 4500.38 Hz  
 F2 -0.003 ppm  
 F2 -1.31 Hz  
 PPRCM 0.35485 ppm/cm  
 HSCM 157.44229 Hz/cm

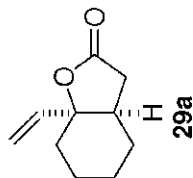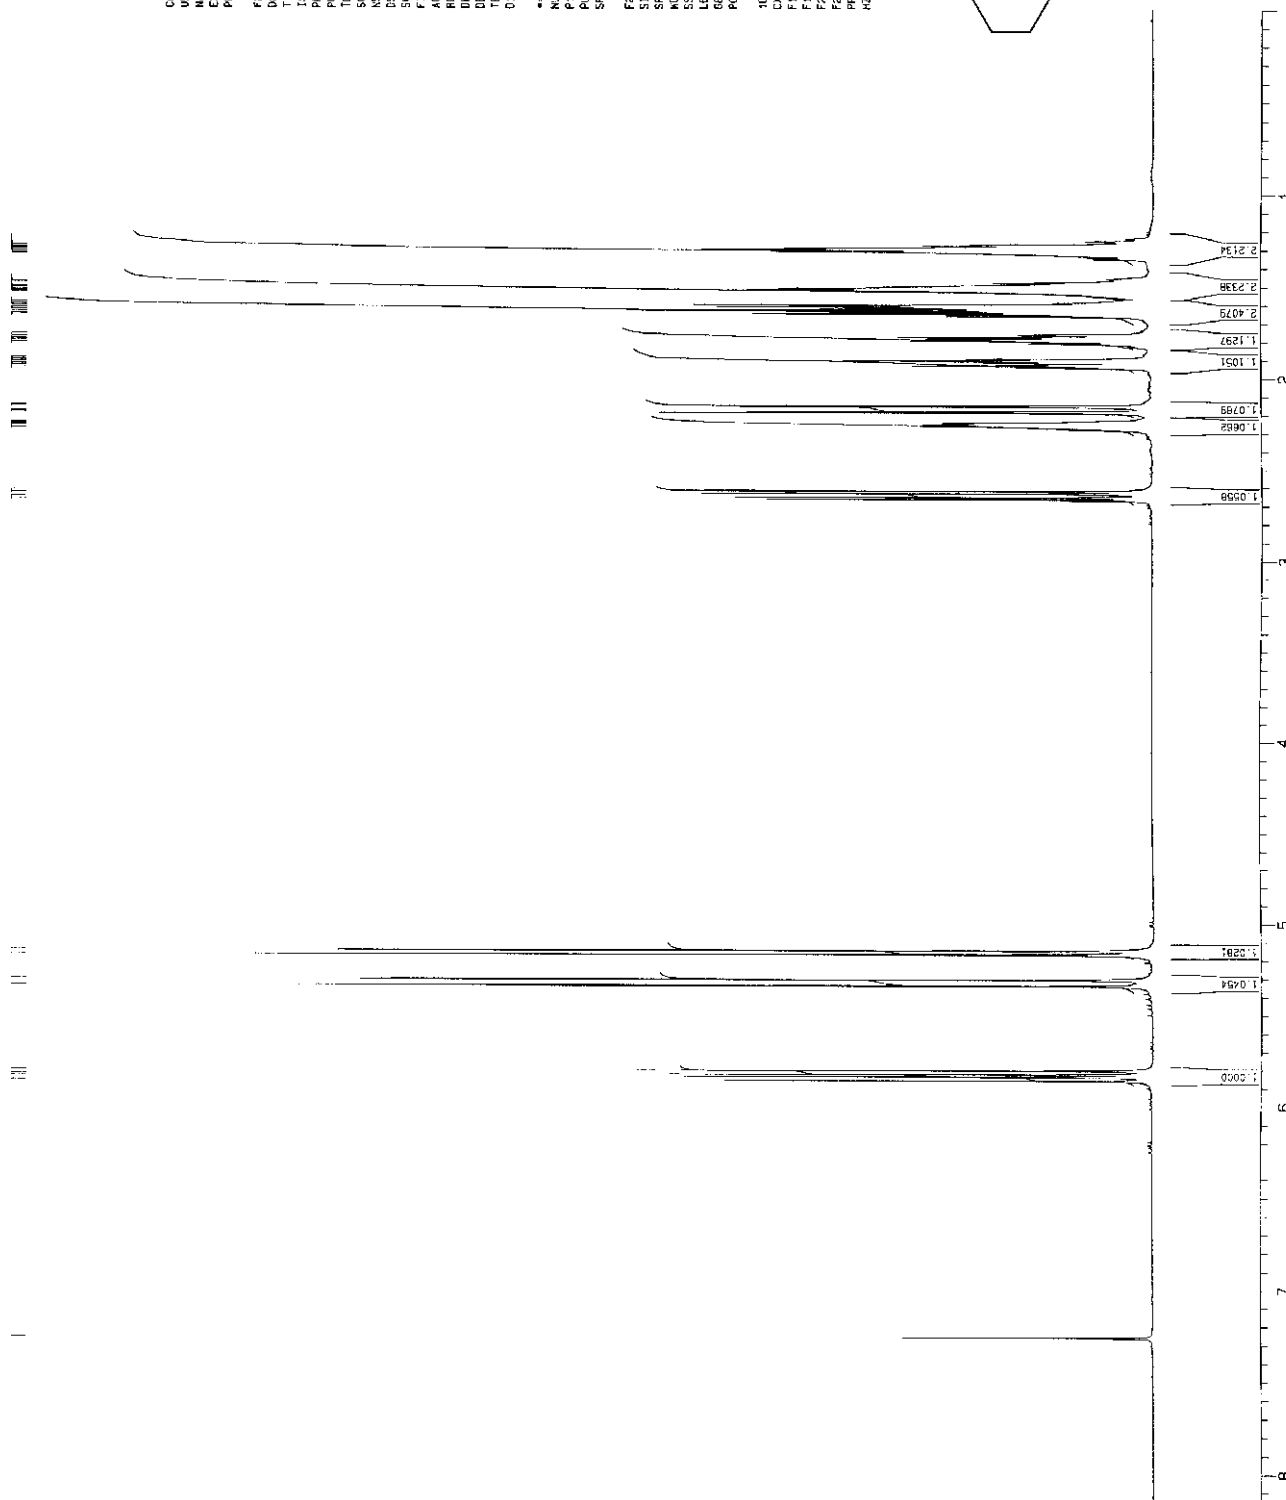

```

Current Data Parameters
USER      JMOLE
NAME      J04-V-2800ee
EXPNO     4
PROCNO    1

F2 - Acquisition Parameters
Date_     20010529
Time      12.05
INSTRUM   spect
PROBHD    5 mm QNP1H
PULPROG   zgpg30
TD         65536
SOLVENT   CDCl3
NS         202
DS         2
SHH        30303.631 Hz
FIDRES     0.462398 Hz
AQ         1.0613840 sec
RG         4597.5
DN         16.500 usec
DE         4.50 usec
TE         300.2 K
D1         0.25600000 sec
D11        0.03600000 sec

***** CHANNEL f1 *****
NUC1       13C
P1         6.25 usec
PL1        0.00 dB
SFO1       125.746485 MHz

***** CHANNEL f2 *****
CPDPRG2   waltz16
NUC2       1H
P2         80.00 usec
PL2        3.00 dB
SFO2       500.136002 MHz

F2 - Processing parameters
SI         65536
SF         125.738226 MHz
WDW        EM
SSB        0
LB         1.00 Hz
GB         0
PC         2.00

ID NAME 0101 parameters
CX       22.80 cm
F1P      250.228 uPa
F1R      250.228 Hz
F2P      10.768 Hz
F2R      -1293.76 Hz
PRNOM    10.57668 0ppm/cm
HZCM     1350.08020 Hz/cm
    
```

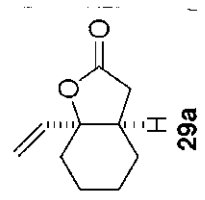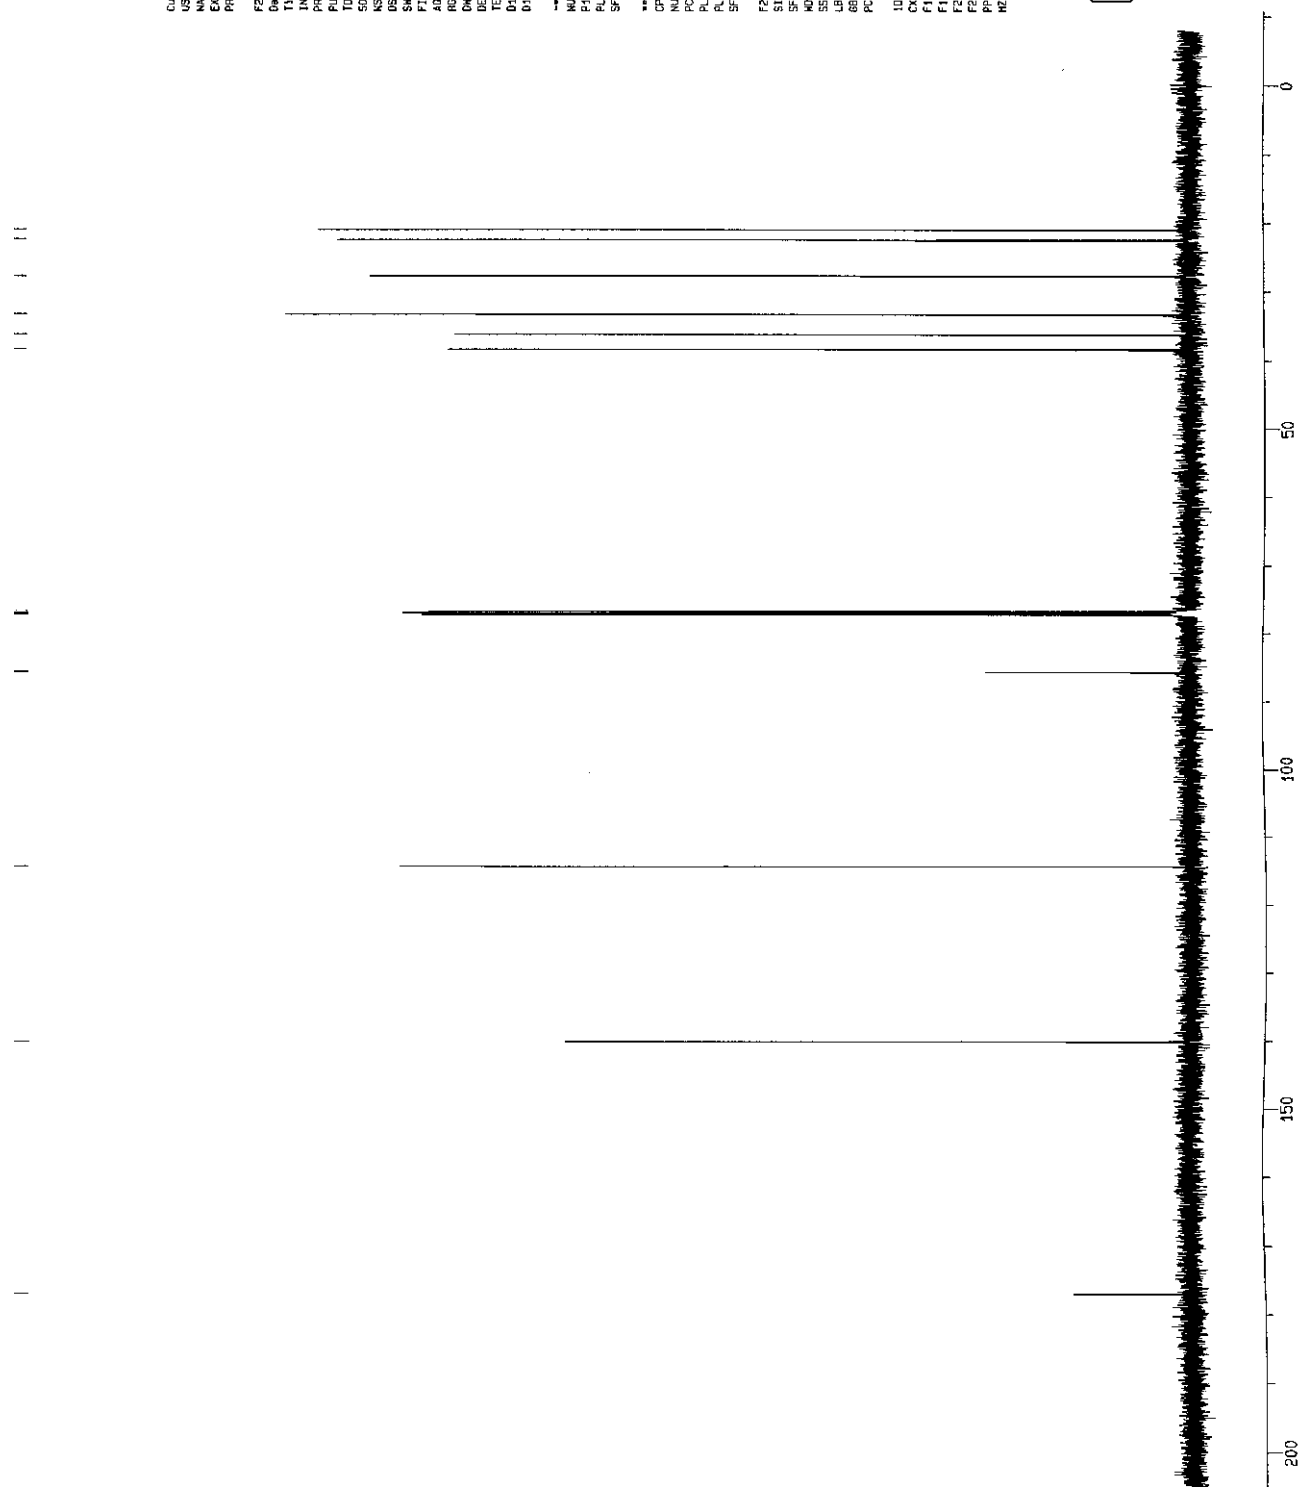

200

150

100

50

0

Current Data Parameters  
 USER JMD/DFE  
 NAME J04-11-286104  
 EXPNO 1  
 PROCNO 1

F2 - Acquisition Parameters  
 Date\_ 20011010  
 Time 14.05  
 INSTRUM gm500  
 PROBHD 5 mm broadband  
 PULPROG zgpg30  
 TD 65536  
 SOLVENT CDCl3  
 NS 4  
 DS 2  
 SWH 8012.820 Hz  
 FIDRES 0.132266 Hz  
 AQ 4.0884656 sec  
 RG 90.5  
 QM 62.400 usec  
 DE 5.00 usec  
 TE 300.0 K  
 D1 0.1000000 sec

\*\*\*\*\* CHANNEL f1 \*\*\*\*\*  
 NUC1 1H  
 P1 12.00 usec  
 PL1 -3.00 dB  
 SF01 500.0330022 MHz

F2 - Processing parameters  
 SI 32768  
 SF 500.0300262 MHz  
 NDM EN  
 SSB 0  
 LB 0.30 Hz  
 GB 0  
 PC 4.00

1D NMR plot parameters  
 CX 22.80 cm  
 F1P 5.035 GHz  
 F1 4517.57 Hz  
 F2P 0.032 GHz  
 F2 15.89 Hz  
 PRACH 0.35485 MHz/cm  
 HZCN 197.44229 Hz/cm

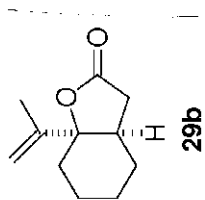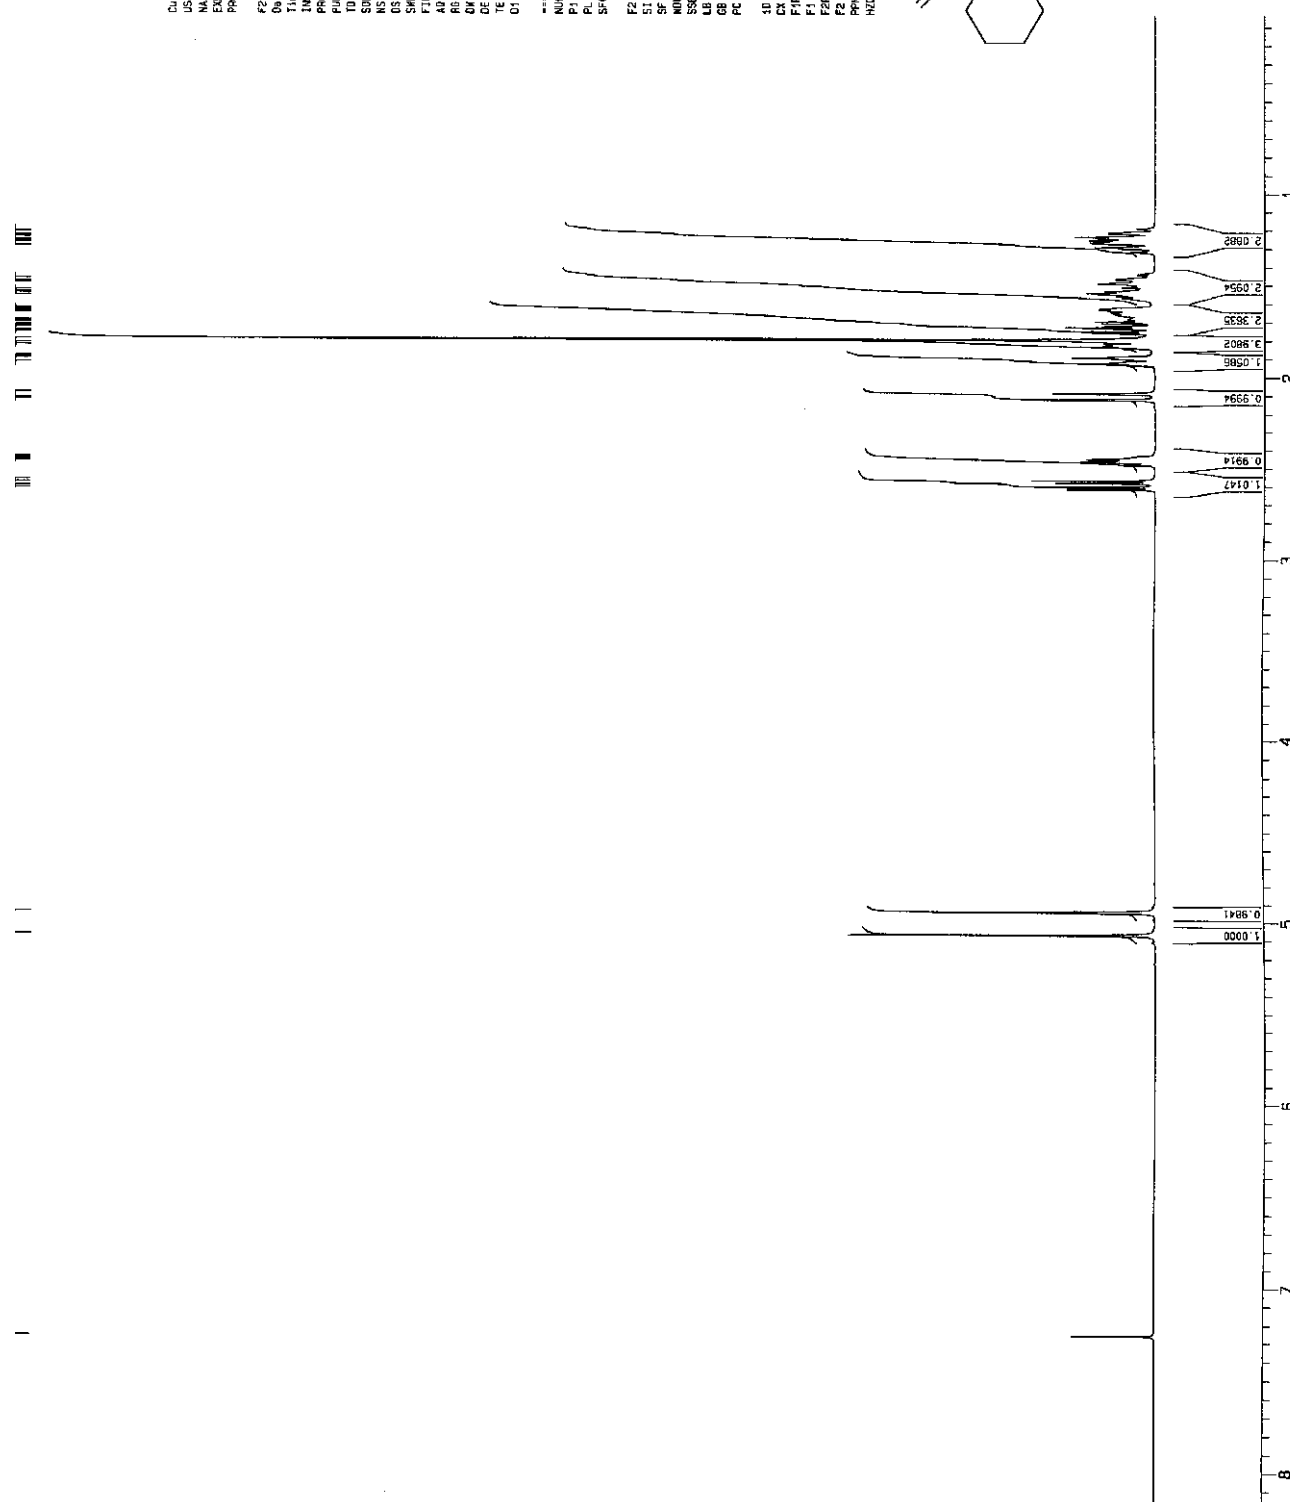



Current Data Parameters  
 USER JMKLFE  
 NAME JPN-1V-286Nov  
 EXPNO 2  
 PROCNO 1

F2 - Acquisition Parameters  
 Date\_ 20011010  
 Time 14.08  
 INSTRUM spect  
 PULPROG zgpg30  
 PROCNO 2  
 SOLVENT CDCl3  
 NS 202  
 DS 2  
 SH1 30303.031 HZ  
 F1RES 0.462988 HZ  
 AQ 1.0813940 SEC  
 RG 4937.6  
 DN 16.500 USEC  
 DE 4.50 USEC  
 TE 300.0 K  
 D1 0.25000000 SEC  
 D11 0.03000000 SEC

\*\*\*\*\* CHANNEL f1 \*\*\*\*\*  
 NUC1 13C  
 P1 6.25 USEC  
 PL1 0.00 DB  
 SF01 125.746466 MHZ

\*\*\*\*\* CHANNEL f2 \*\*\*\*\*  
 CPDPRG2 waltz16  
 NUC2 1H  
 P2 80.00 USEC  
 PL2 -3.00 DB  
 SF02 500.032902 MHZ

F2 - Processing parameters  
 SI 65536  
 SF 125.746547 MHZ  
 WDW EM  
 SSB 0  
 LB 1.00 HZ  
 GB 0  
 PC 2.00

1D NMR plot parameters  
 TX 22.80 cm  
 F1 230.214 ppm  
 F2 289.540 HZ  
 F3 130.763 HZ  
 PRNOM 10.57058 ppm/cm  
 XZOOM 1329.08020 HZ/cm

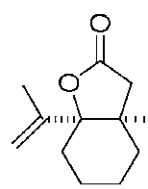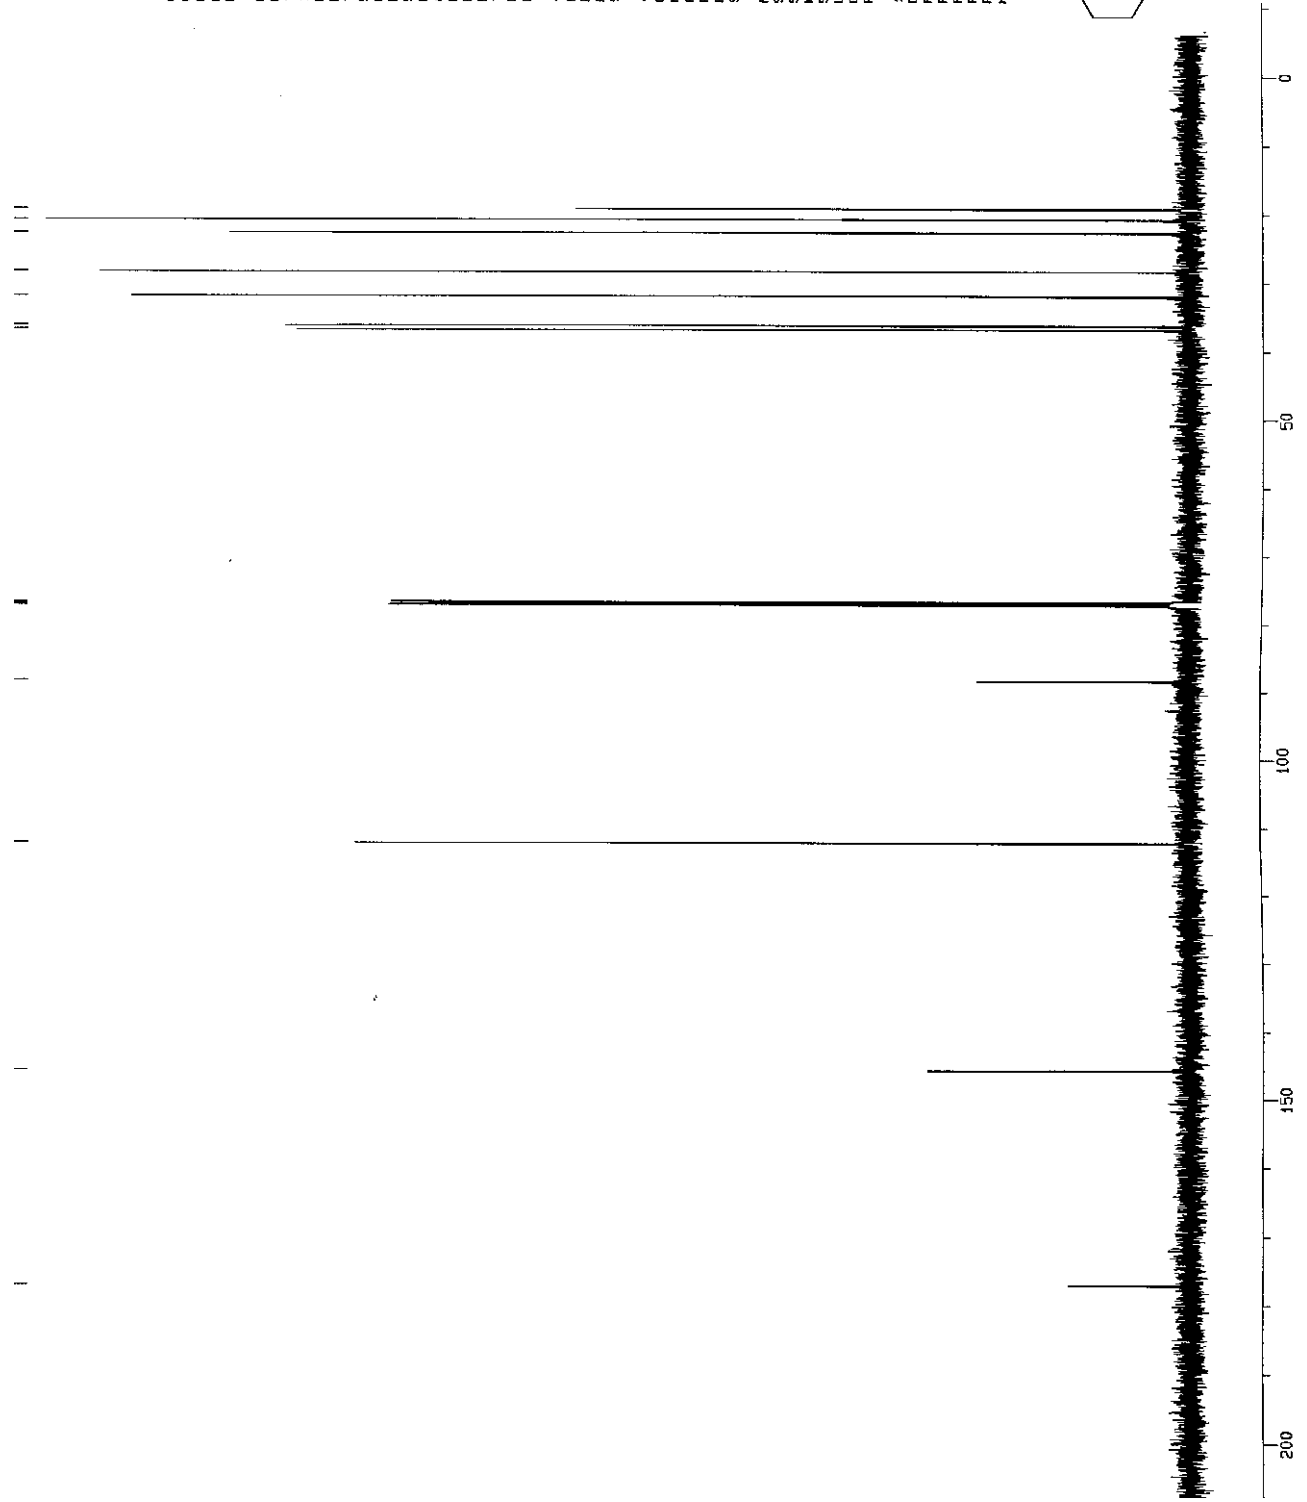

Current Data Parameters  
 USER JNK/DFE  
 NAME JDM-1V-282  
 EXPNO 1  
 PROCNO 1

F2 - Acquisition Parameters  
 Date\_ 20011002  
 Time 13.40  
 INSTRUM gpc400  
 PULPROG zgpg30  
 TO 65.000  
 SOLVENT CDCl3  
 NS 6  
 DS 2  
 SMH 8410.296 Hz  
 FIDRES 0.097813 Hz  
 AQ 5.111979 sec  
 RG 128  
 DN 78.000 uspc  
 DE 4.50 uspc  
 TE 300.0 K  
 D5 0.1000000 sec

\*\*\*\*\* CHANNEL f1 \*\*\*\*\*  
 NUC1 1H  
 P1 12.00 uspc  
 PL1 0.00 dB  
 SFO1 400.1326109 MHz

F2 - Processing parameters  
 SI 65535  
 SF 400.1300211 MHz  
 WDW EM  
 SSB 0  
 LB 0.30 Hz  
 GB 0  
 PC 2.00

1D NMR plot parameters  
 CX 22.60 ca  
 F1P 9.425 ppb  
 F1 3611.30 Hz  
 F2P 0.010 ppb  
 F2 3.85 Hz  
 PPHOM 0.358548 ppm/cm  
 HZCM 188.22130 Hz/cm

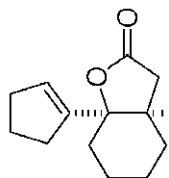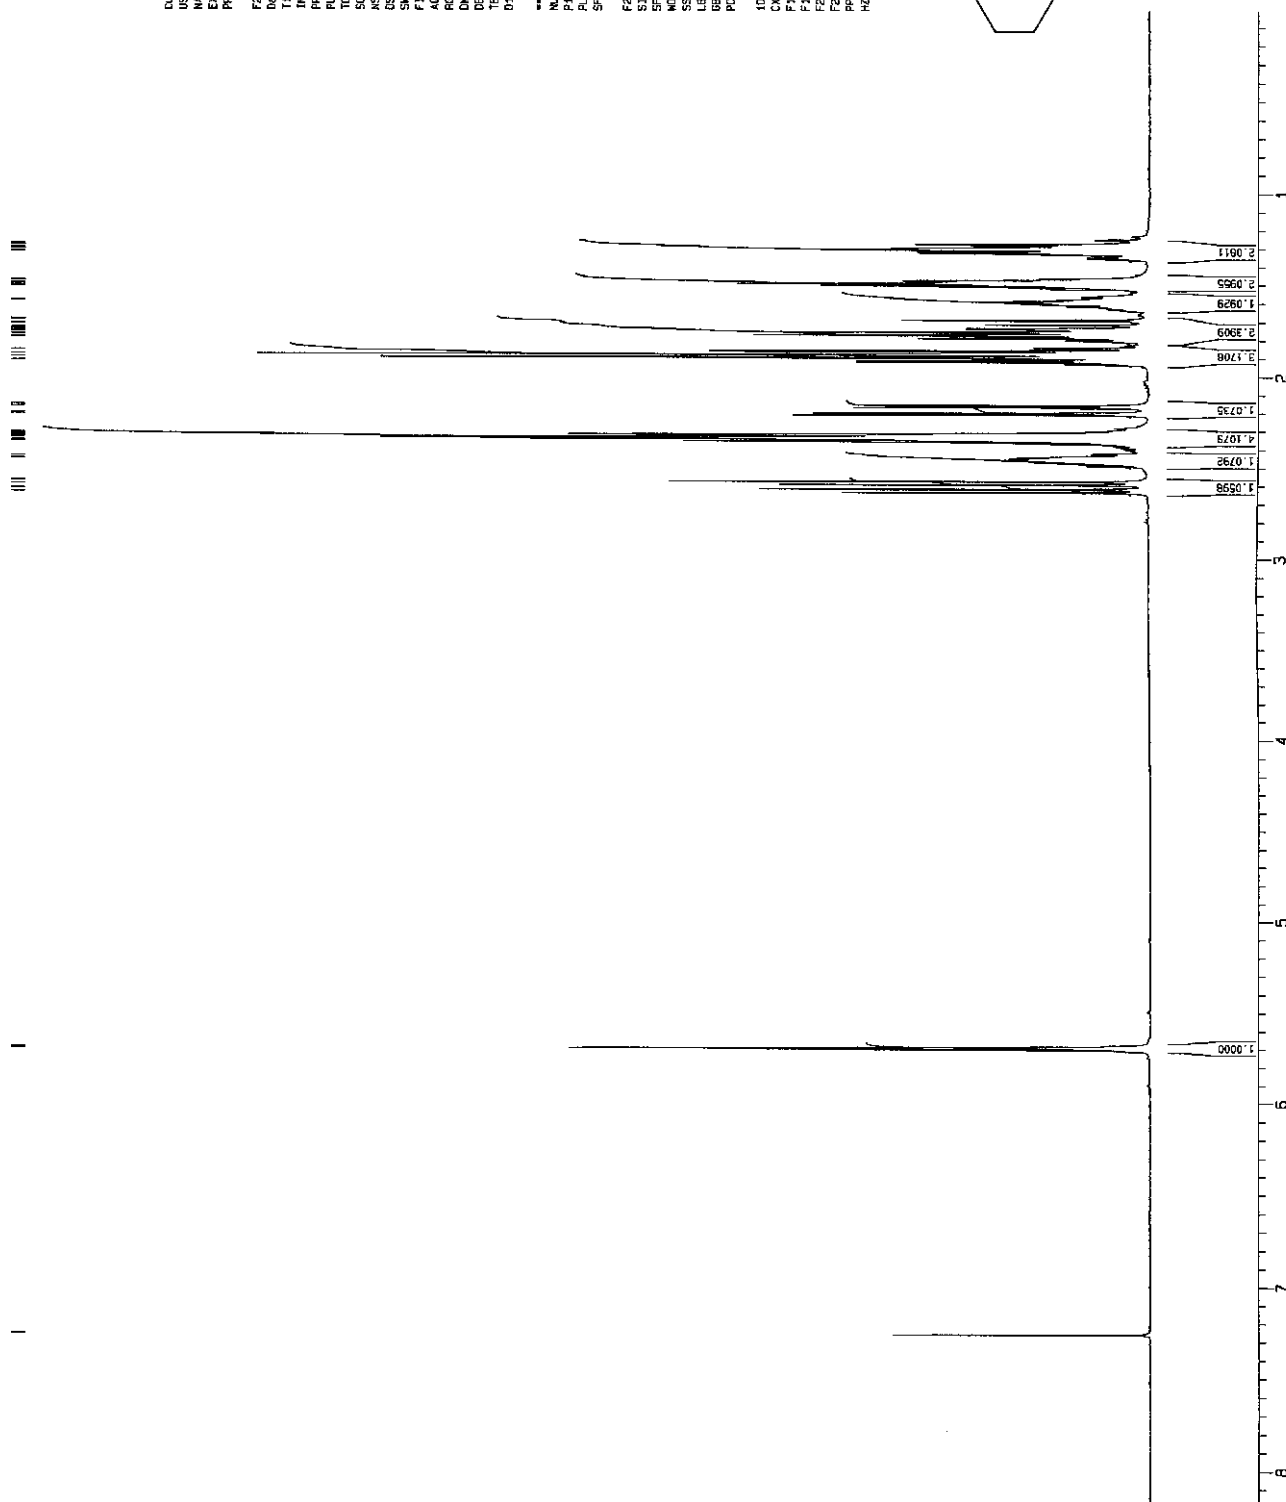

```

Current Data Parameters
USER      UNOLFE
NAME      IDw-1v-286nop
EXPNO     2
PROCNO    1

F2 - Acquisition Parameters
Date_     20011002
Time      13.54
INSTRUM   gdd500
PROBHD    5 mm b-broadban
PULPROG   zgpg30
TD         65536
SFO1      500.1362602 MHz
SOLVENT   CDCl3
NS         172
DS         2
SNI        30303.031 Hz
FIDRES     0.452366 Hz
AQ         1.0613940 sec
RG         4597.6
DW         16.500 usec
DE         4.50 usec
TE         300.0 K
O1         0.2500000 sec
O11        0.0300000 sec

***** CHANNEL f1 *****
NUC1       13C
P1         8.25 usec
PL1        0.00 dB
SFO1      125.7464486 MHz

***** CHANNEL f2 *****
CPDPRG2   waltz16
NUC2       1H
P2         80.00 usec
PL2        -3.00 dB
SFO2      500.0326002 MHz

F2 - Processing parameters
SI         65536
SF         125.7464486 MHz
WDW        EM
SSB        0
LB         1.00 Hz
GB         0
PC         2.00

1D NMR plot parameters
CX         22.80 cm
F1P        230.223 nPa
F2P        200.136 nPa
PCPDW      -1.56670 nPa
P1PCPDW    10.571069 um/ton
P2PCPDW    1339.09032 Hz/Ga
    
```

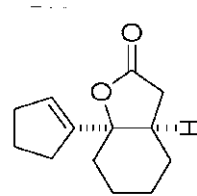

29c

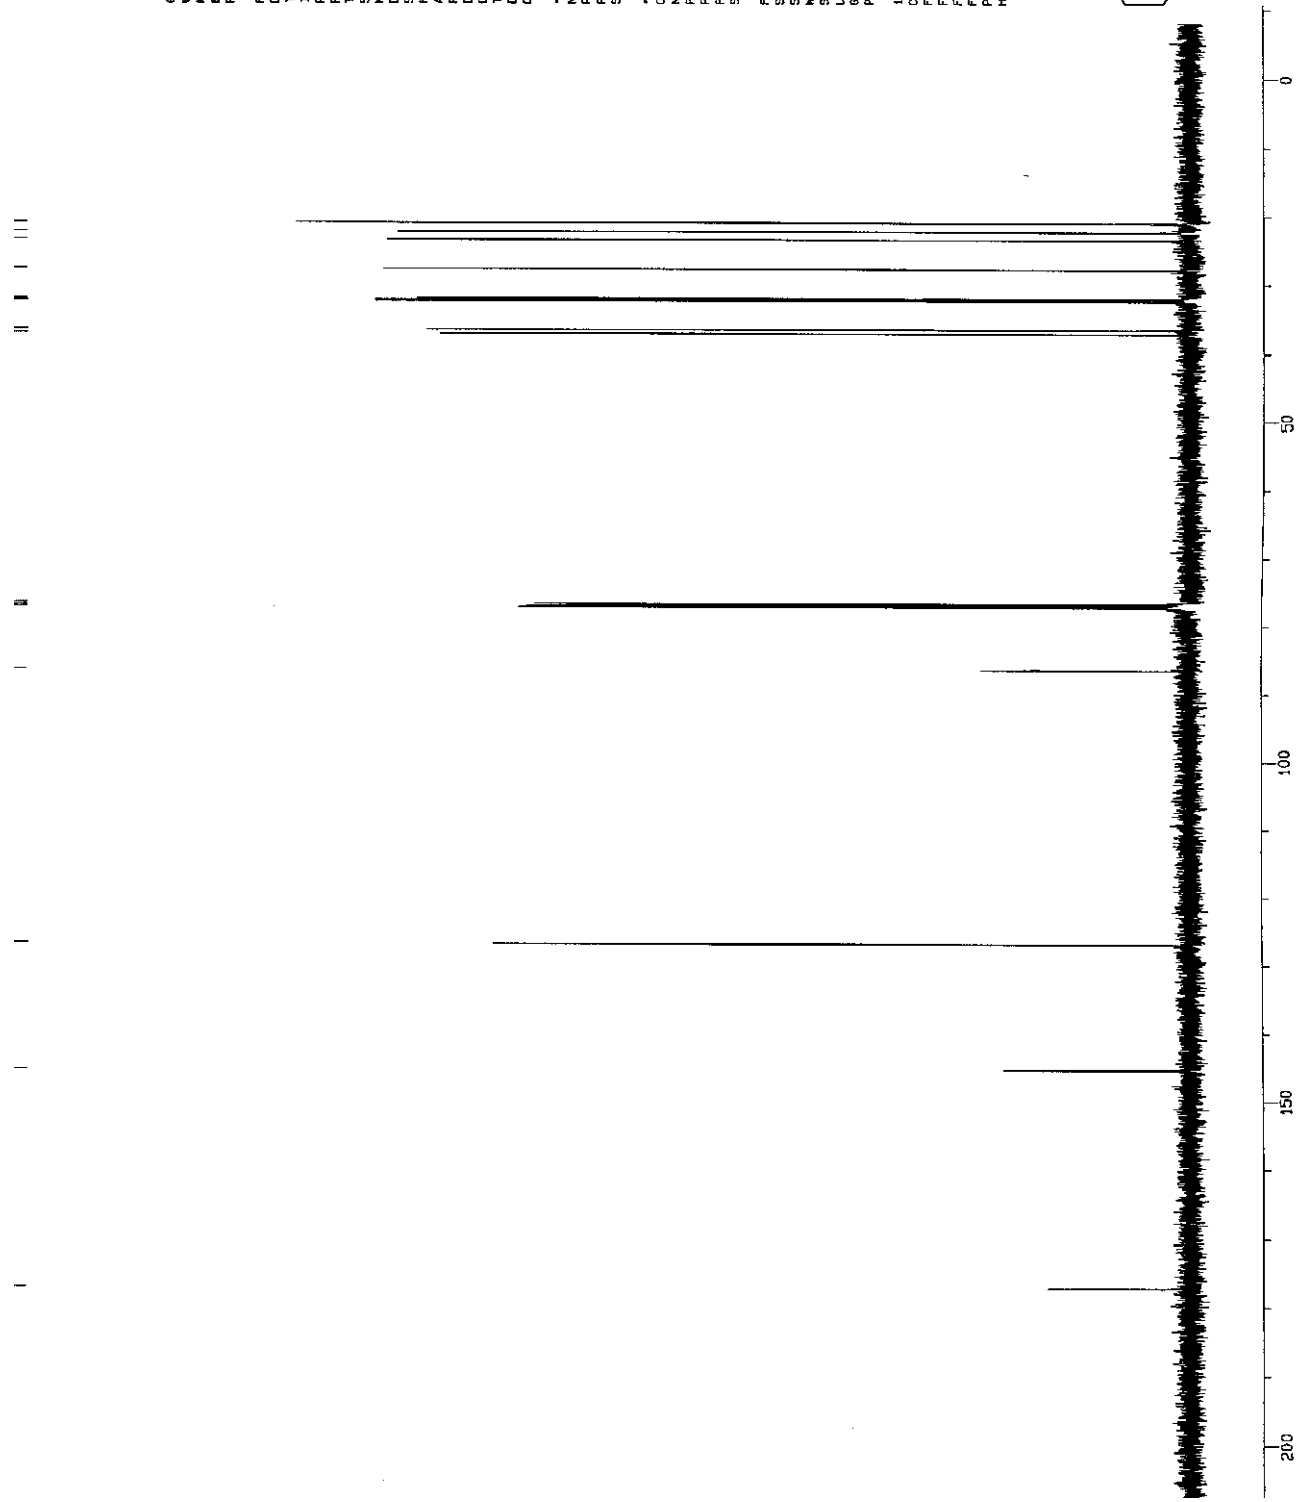

Current Data Parameters  
 USER UKLIFE  
 NAME |PM-1V-278  
 EXPNO 1  
 PROCNO 1

F2 - Acquisition Parameters

Date\_ 20010927  
 Time 15.26  
 INSTRUM dr-400  
 PROBRD 5 mm QNP 1H  
 PULPROG zgpg30  
 TD 65536  
 SOLVENT CDCl3  
 NS 15  
 DS 2  
 SSB 6410.256 Hz  
 FIDRES 0.097813 Hz  
 AQ 5.118579 sec  
 RG 90.5  
 DM 79.000 usec  
 DE 4.50 usec  
 TE 300.0 K  
 D1 0.1000000 sec

\*\*\*\*\* CHANNEL F1 \*\*\*\*\*

NUC1 13C  
 P1 12.00 usec  
 PL1 0.00 dB  
 SFO1 400.1326000 MHz

F2 - Processing parameters

SF 605336  
 WDW EM  
 SSB 0  
 LB 0.30 Hz  
 GB 0  
 PC 2.00

1D NMR plot parameters

C2 32.00 cm  
 FIP 9.025 um  
 F1 3814.30 Hz  
 F2 0.010 ppm  
 F3 3.65 Hz  
 FWHM 0.39542 ppm/cm  
 RESOL 156.22130 Hz/cm

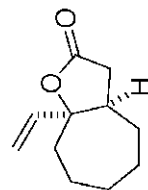

30a

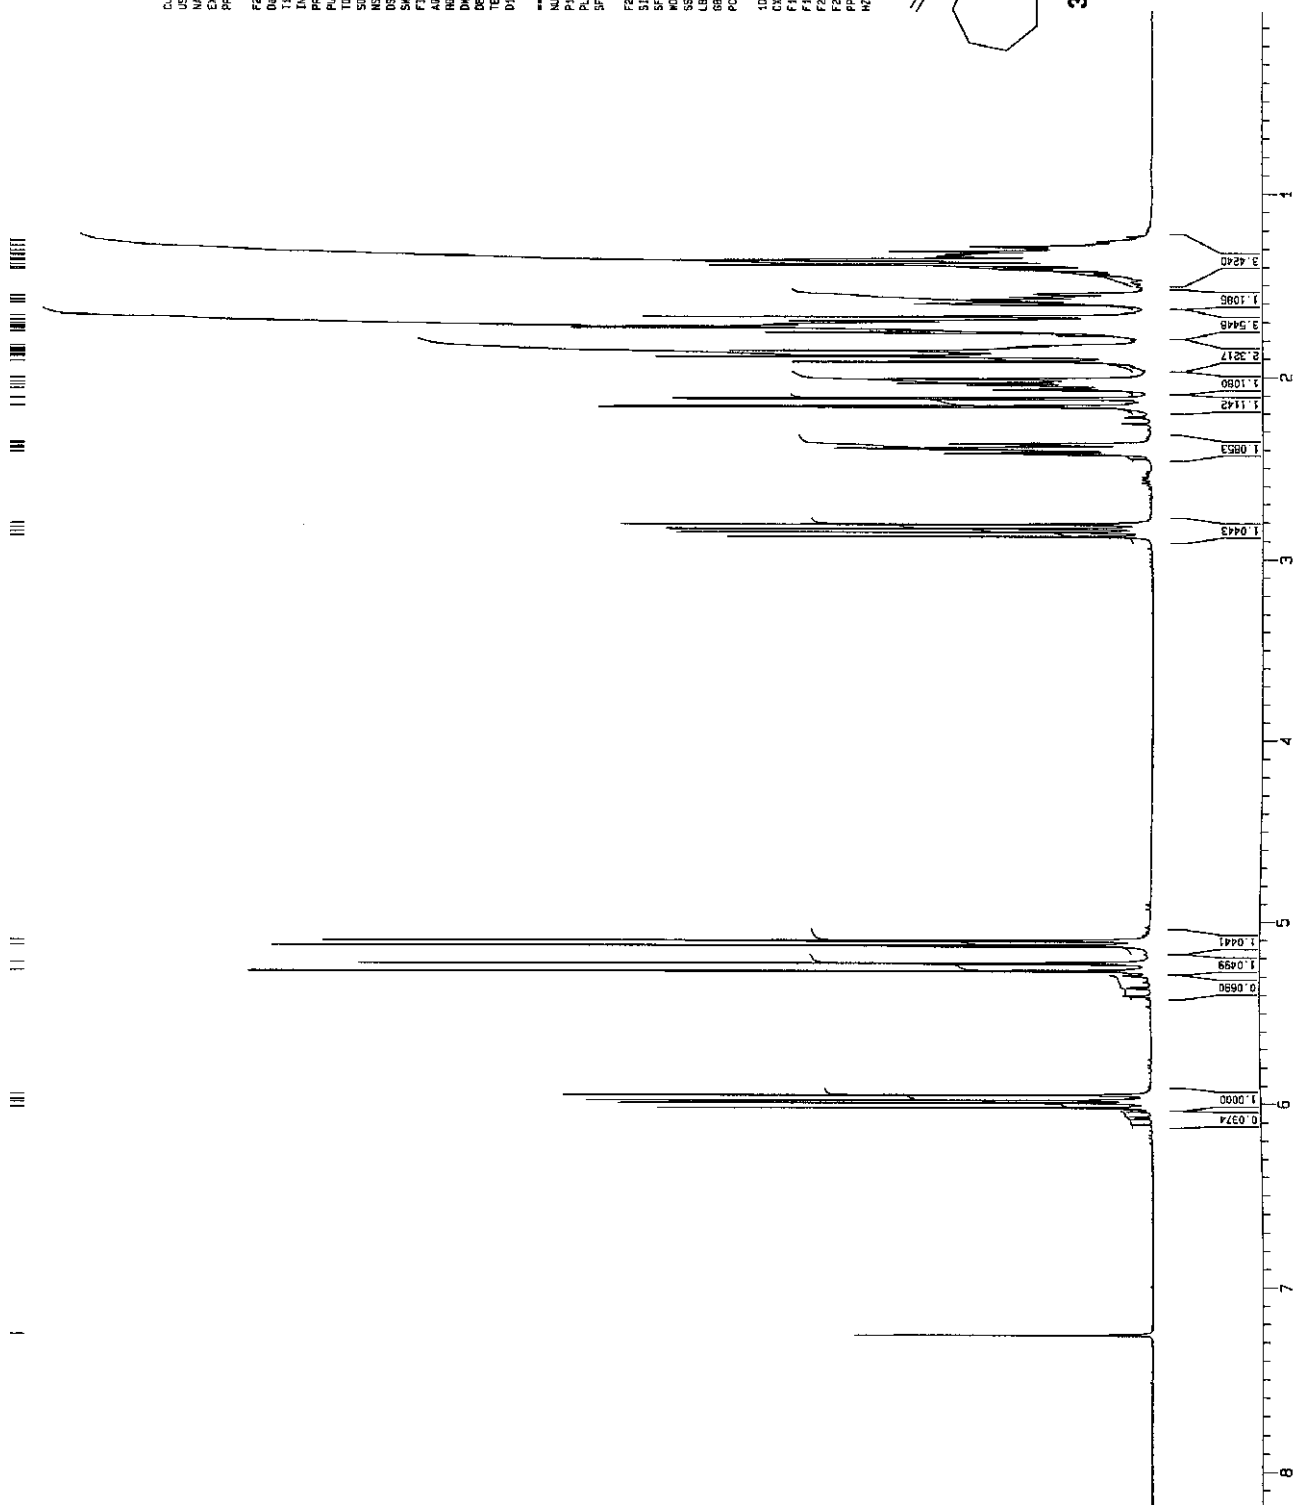

Current Data Parameters  
 USER JMK/LE  
 NAME 10M-11-278Nov  
 EXPNO 2  
 PROCNO 1

F2 - Acquisition Parameters  
 Date\_ 20010527  
 Time 16.01  
 NS/DW 98000  
 CHRG 5  
 FIL PRG 5 IM DR PROG  
 TO 65536  
 SOLVENT CDCl3  
 NS 216  
 DS 2  
 SWH 30303.031 Hz  
 FIDRES 0.482368 Hz  
 AQ 1.0813540 sec  
 RG 4537.6  
 DM 16.500 usec  
 DE 4.50 usec  
 TE 300.0 K  
 F1 0.2500000 sec  
 F2 0.0300000 sec  
 SFO1 125.765486 MHz

\*\*\*\*\* CHANNEL F1 \*\*\*\*\*  
 NUC1 13C  
 P1 8.25 usec  
 PL1 0.00 dB  
 SFO1 125.765486 MHz

\*\*\*\*\* CHANNEL F2 \*\*\*\*\*  
 CPDPRG2 waltz16  
 NUC2 1H  
 P2 80.00 usec  
 PL2 -3.00 dB  
 SFO2 500.132602 MHz

F2 - Processing parameters  
 SI 65536  
 SF 125.726547 MHz  
 NH 1  
 NHM 0  
 SSB 0  
 LB 1.00 Hz  
 GB 0  
 PC 2.00

1D NMR plot parameters  
 CX 22.80 cm  
 CP 23.214 ips  
 F1 2895.46 Hz  
 F2 -1337.63 Hz  
 PRGN 10.57068 cps/cm  
 MCM 1329.05020 Hz/cm

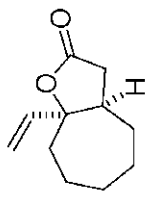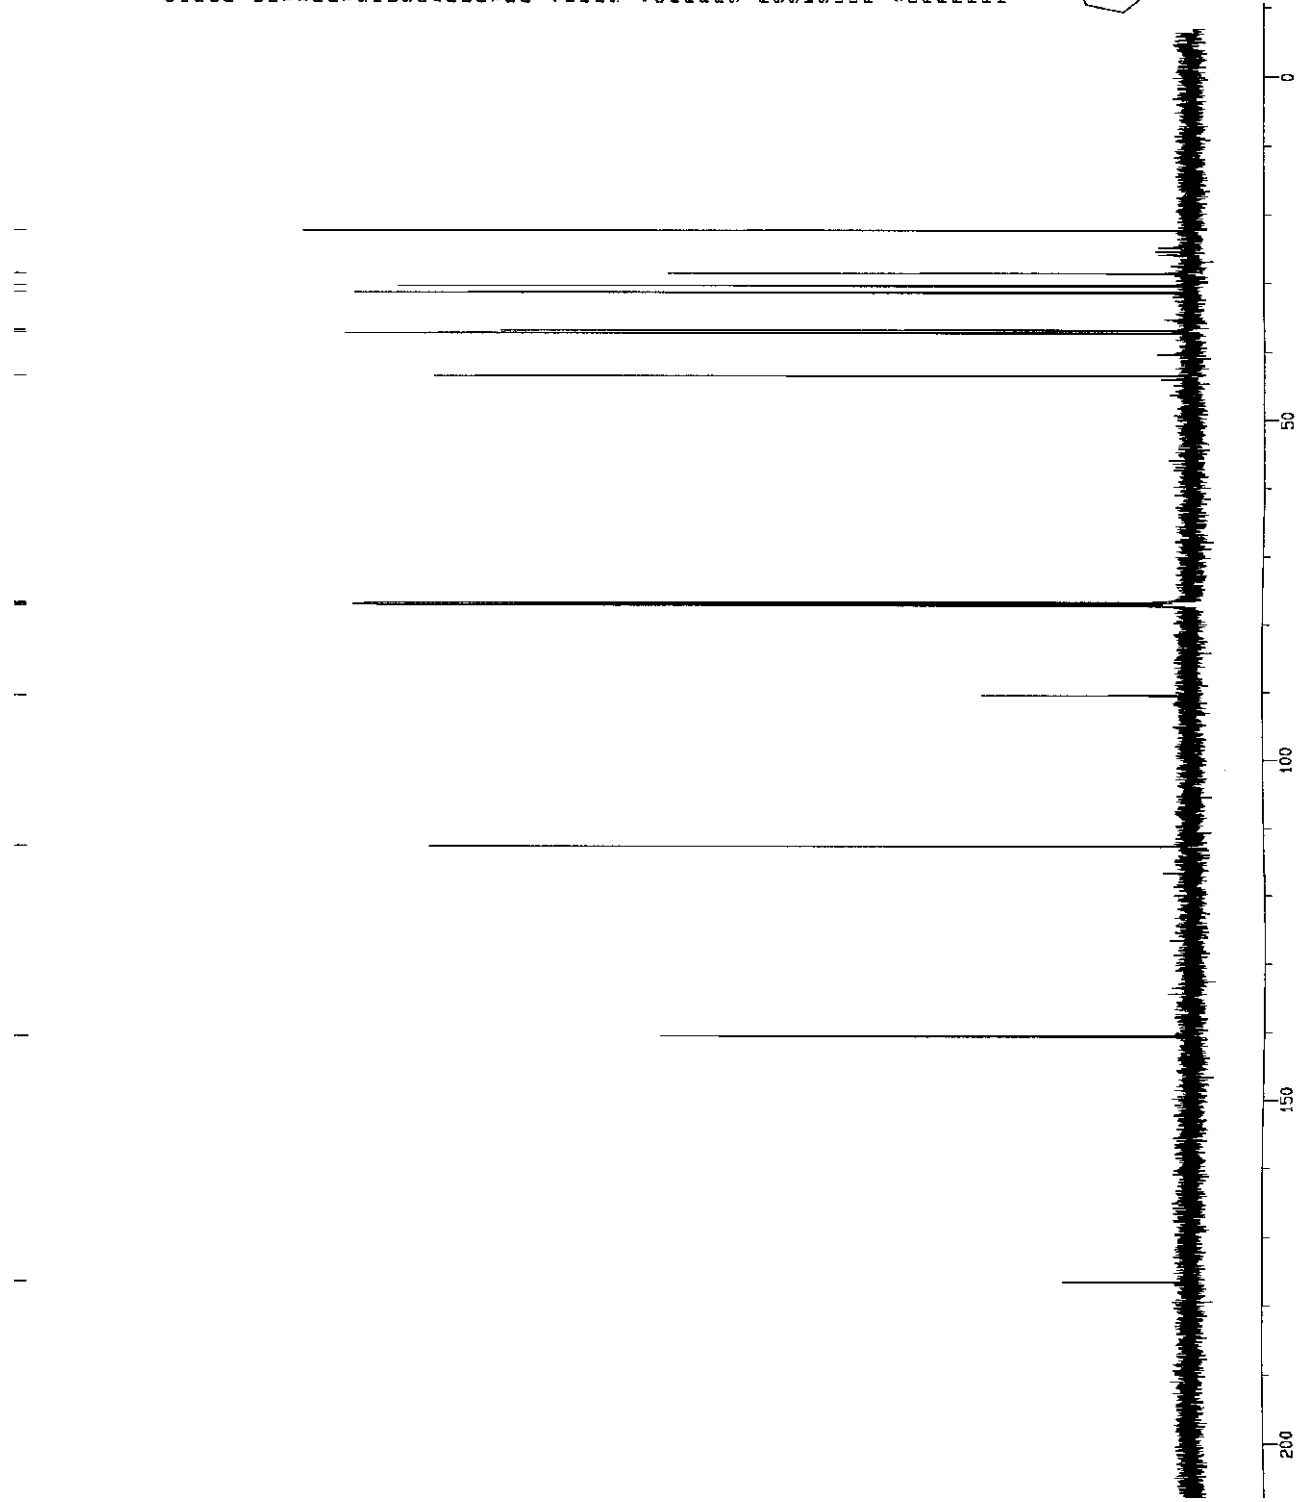

Current Data Parameters  
 USER UNLIFE  
 NAME 18x-19-275  
 EXPNO 1  
 PROCNO 1

F2 - Acquisition Parameters

Date\_ 20010925  
 Time 17.43  
 INSTRUM spect  
 PULPROG zgpg30  
 PROCNO 1  
 TD 65536  
 SOLVENT CDCl3  
 NS 6  
 DS 2  
 SWH 6410.256 Hz  
 FIDRES 0.09793 Hz  
 AQ 5.1118579 sec  
 RG 406.4  
 DM 79.000 usec  
 DE 4.50 usec  
 TE 300.2 K  
 D1 0.10000000 sec

\*\*\*\*\* CHANNEL f1 \*\*\*\*\*

NUC1 1H  
 P1 12.00 usec  
 PL1 0.00 dB  
 SFO1 400.1328009 MHz

F2 - Processing parameters

SF 400.1328009 MHz  
 WDW EM  
 SSB 0  
 LB 0.30 Hz  
 GB 0  
 PC 2.00

10 NMR plot parameters

CX 22.60 cm  
 FIP 8.982 cps  
 F1 3697.85 Hz  
 F2 0.043 cps  
 F2 17.26 Hz  
 PPRCN 0.35248 ppm/cm  
 PZCN 157.6494 Hz/cm

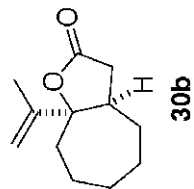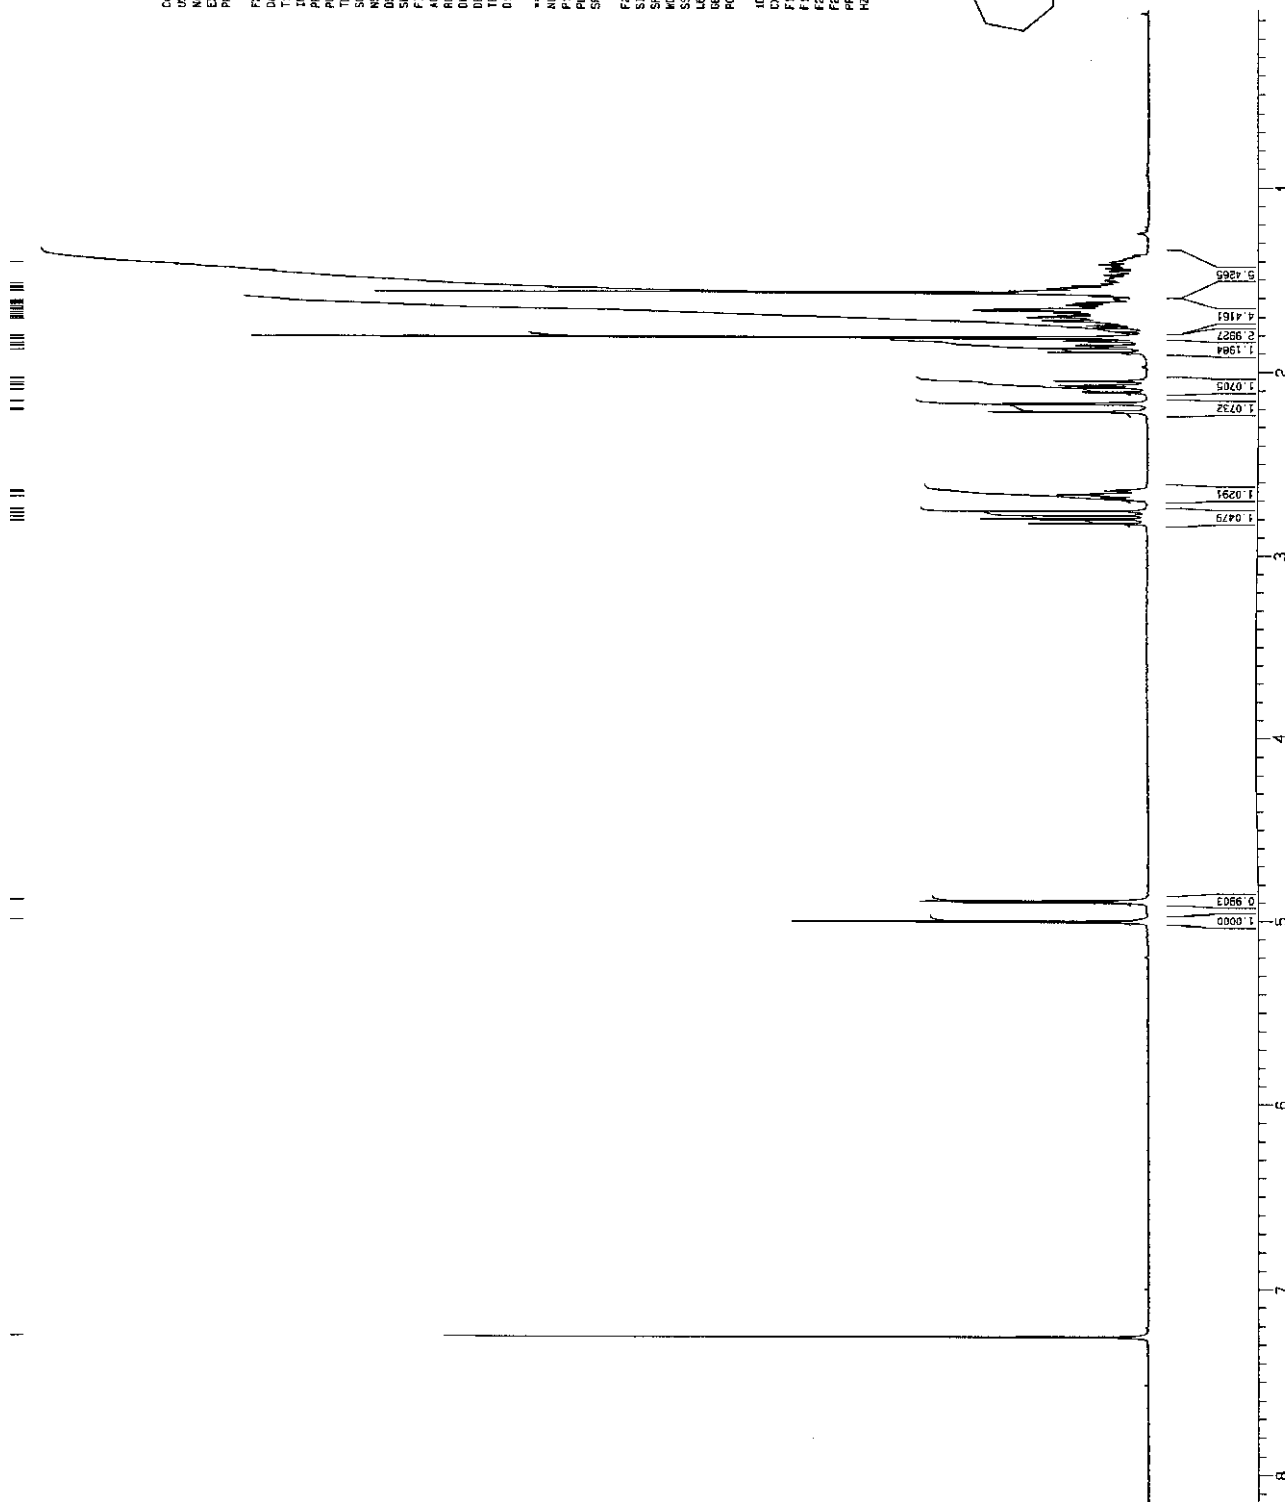

Current Data Parameters  
 USER: JNKLFJE  
 NAME: JPK-11-275008  
 EXPNO: 4  
 PROCNO: 1

F2 - Acquisition Parameters

Date\_: 20010526  
 Time: 10.00  
 INSTRUM: spect  
 PULPROG: zgpg30  
 RPPROG: 5 ms gradient  
 ALPROG: spect  
 TD: 65536  
 SOLVENT: CDCl3  
 NS: 202  
 DS: 2  
 SWH: 30303.031 Hz  
 FIDRES: 0.462388 Hz  
 AQ: 1.0813840 sec  
 RG: 4597.6  
 DM: 16.500 usec  
 DE: 4.30 usec  
 TE: 300.0 K  
 D1: 0.25000000 sec  
 D11: 0.03000000 sec

\*\*\*\*\* CHANNEL f1 \*\*\*\*\*

NUC1: 13C  
 P1: 6.25 usec  
 PL1: 0.00 dB  
 SF01: 125.7464456 MHz

\*\*\*\*\* CHANNEL f2 \*\*\*\*\*

CPDPRG2: waltz16  
 NUC2: 1H  
 P2: 80.00 usec  
 PL2: -3.00 dB  
 SF02: 500.0325002 MHz

F2 - Processing parameters

SF: 125.7285333 MHz  
 NRG: EM  
 SSB: 0  
 LB: 1.00 Hz  
 GB: 0  
 PC: 2.00

10 MHz plot parameters

CA: 22.80 cm  
 CP: 20.250 DPA  
 F1: 20346.783 MHz  
 F2: 10.783 MHz  
 F2: -1356.24 Hz  
 PPMCN: 10.57058 ppm/cm  
 MCKN: 1329.00020 Hz/cm

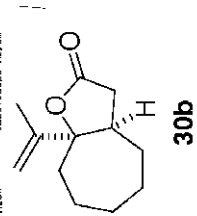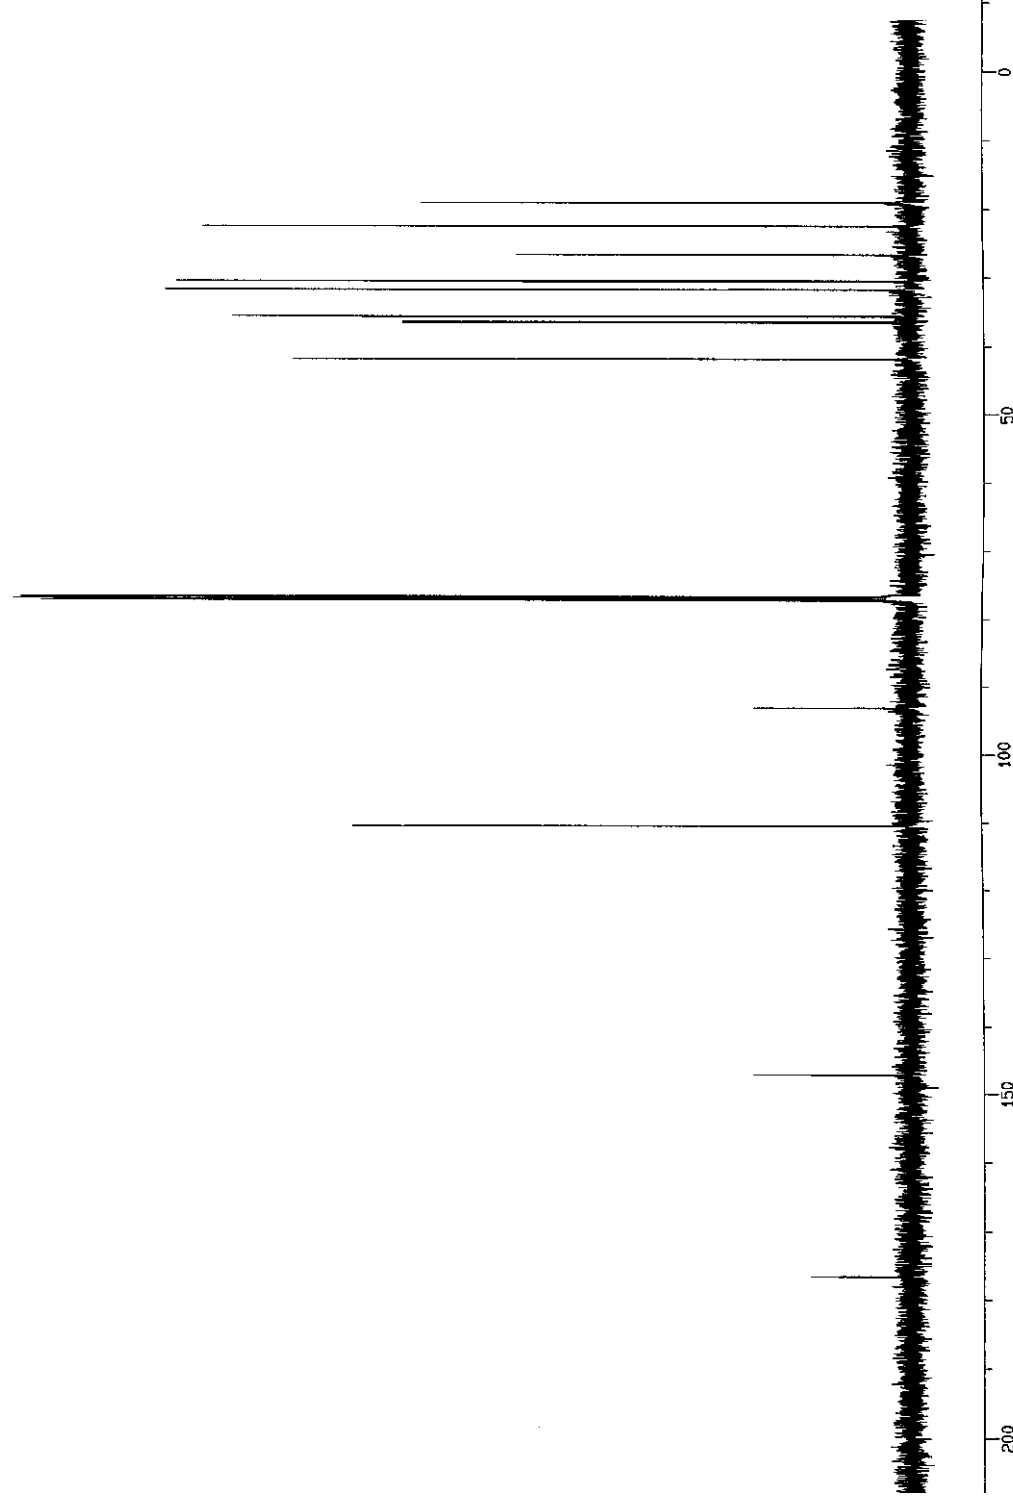

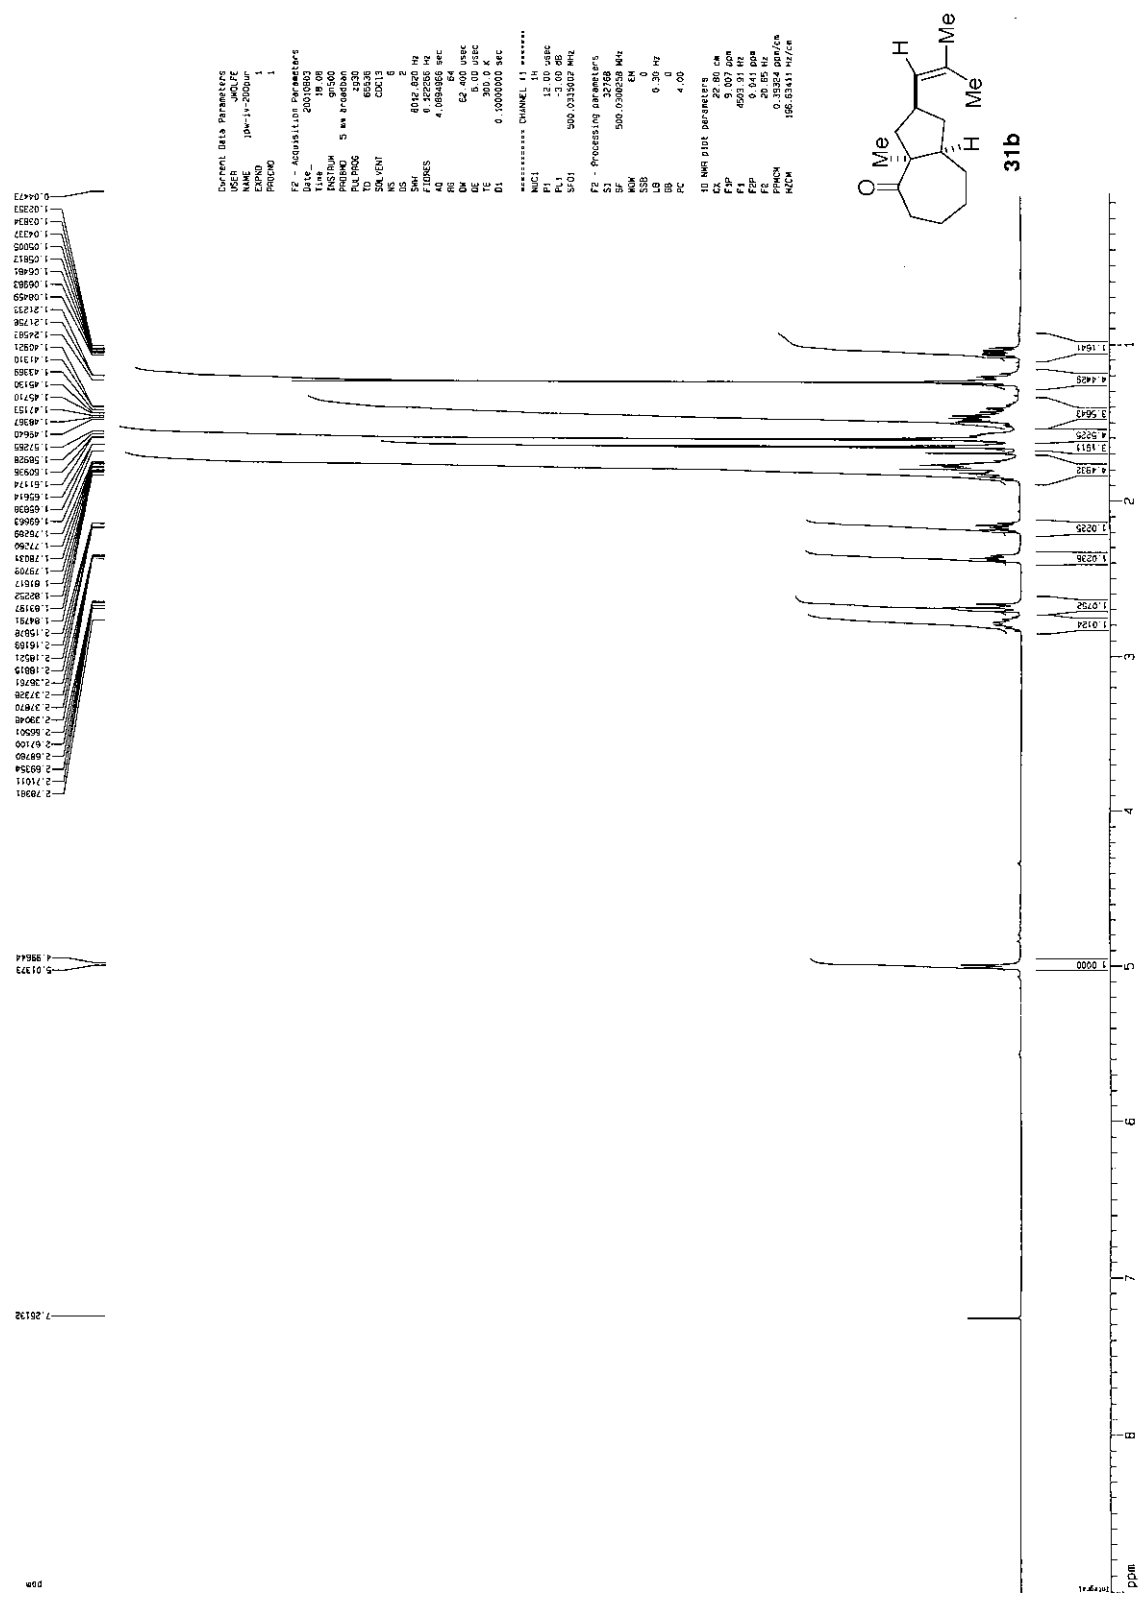



<sup>13</sup>C spectrum with <sup>1</sup>H decoupling

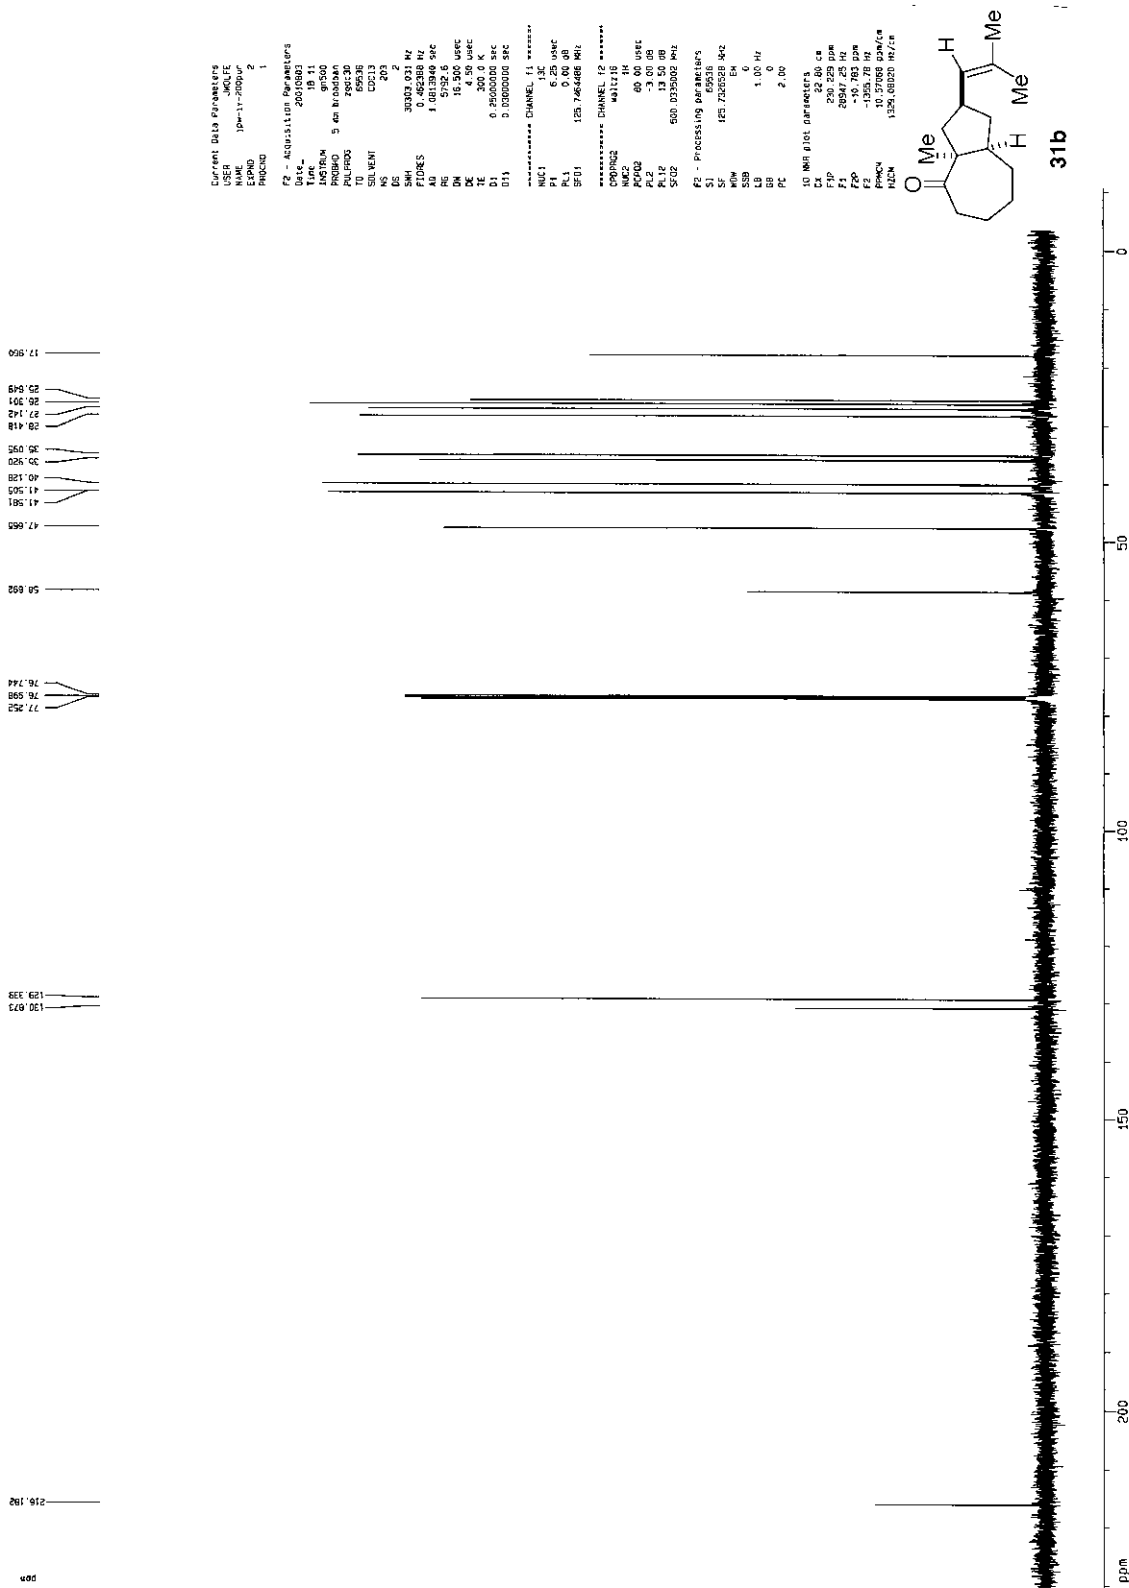

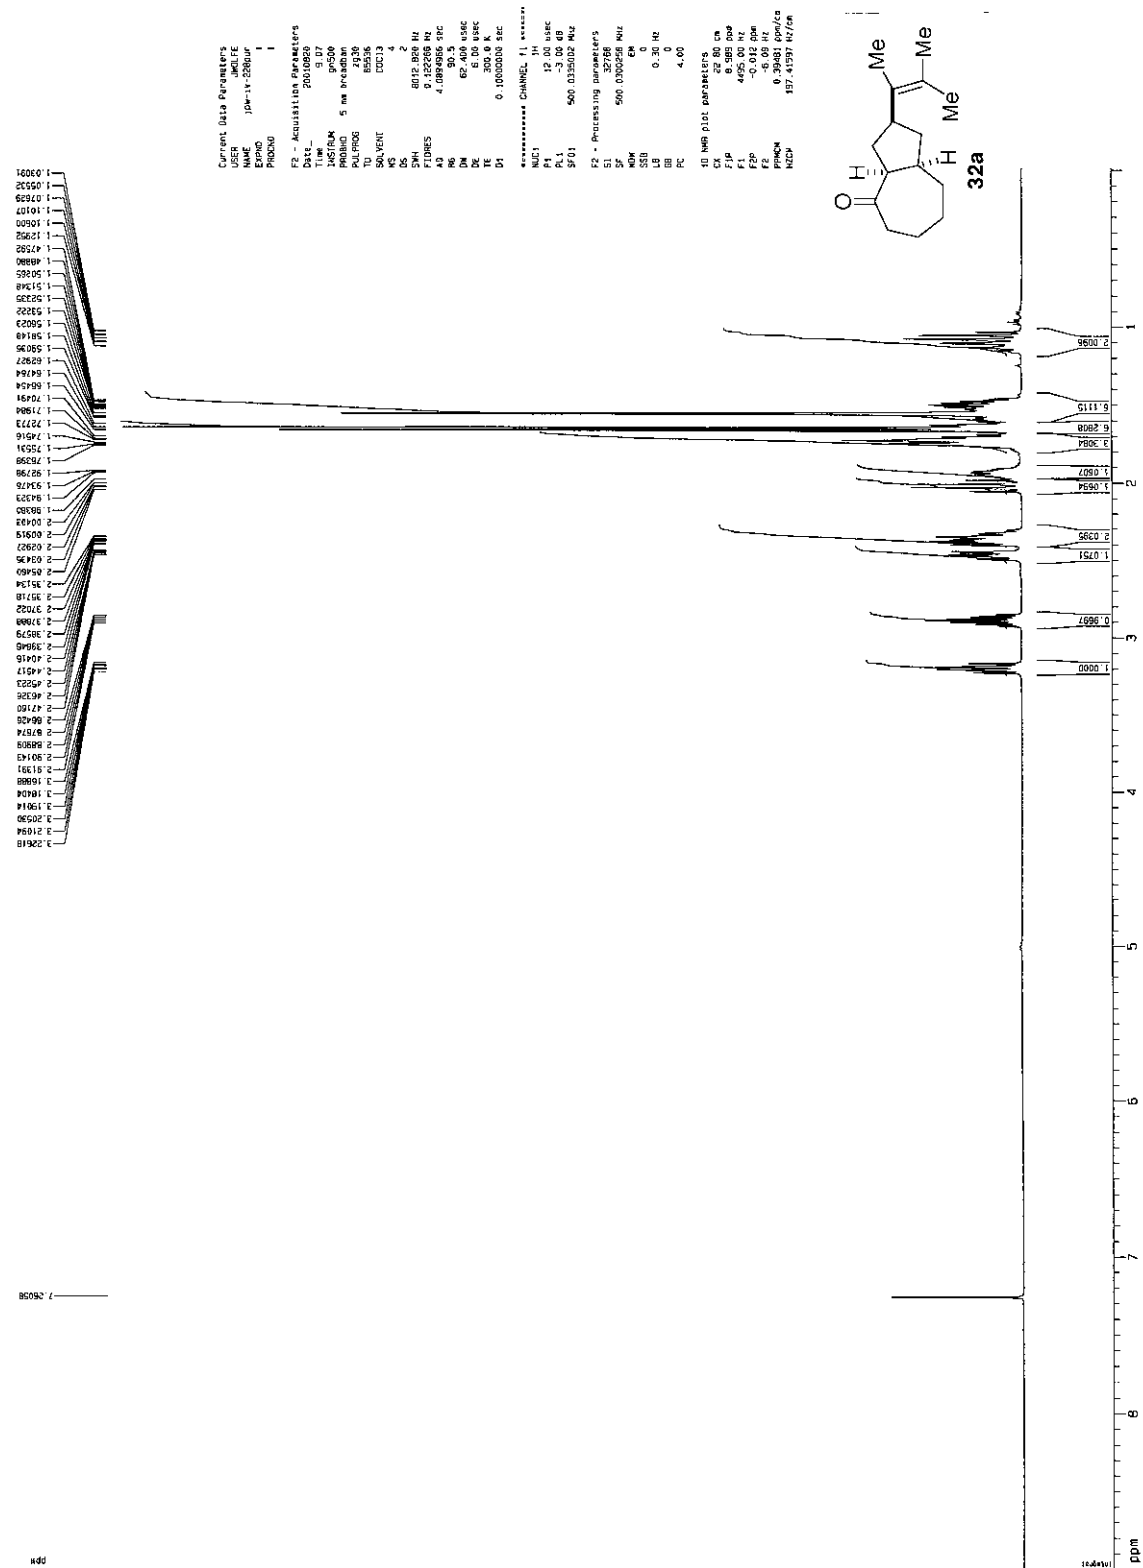

ppm

13C spectrum with 1H decoupling

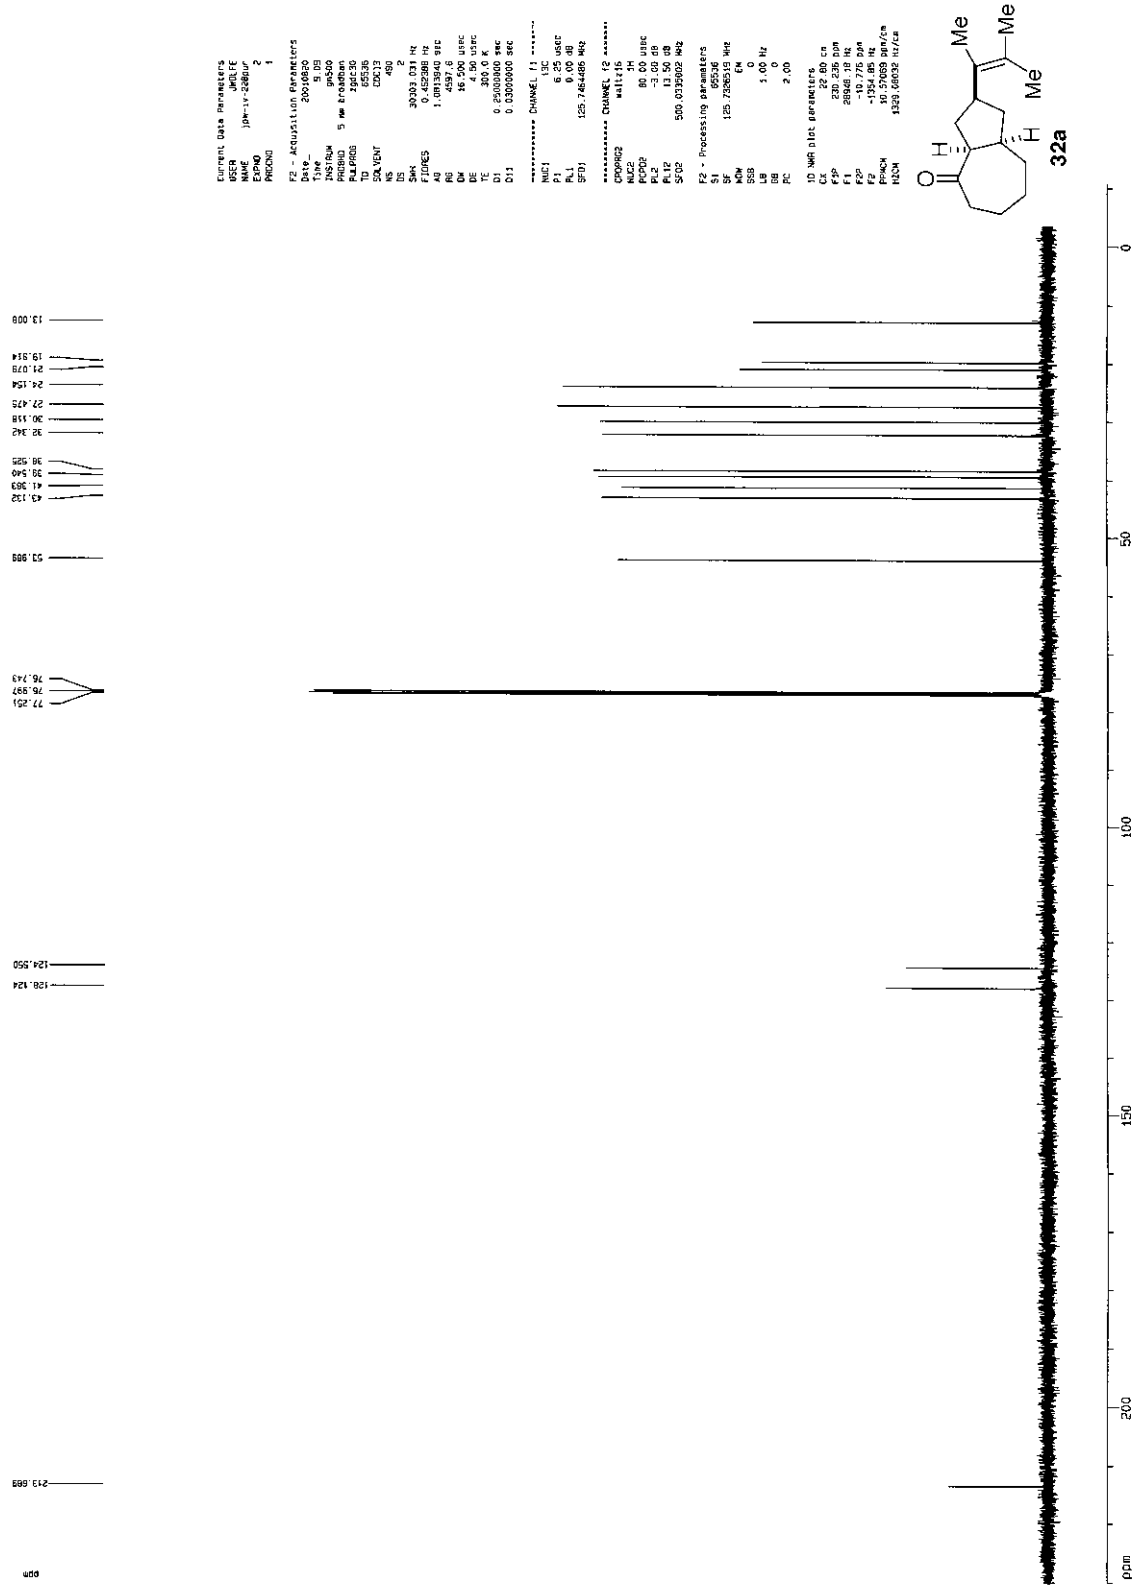

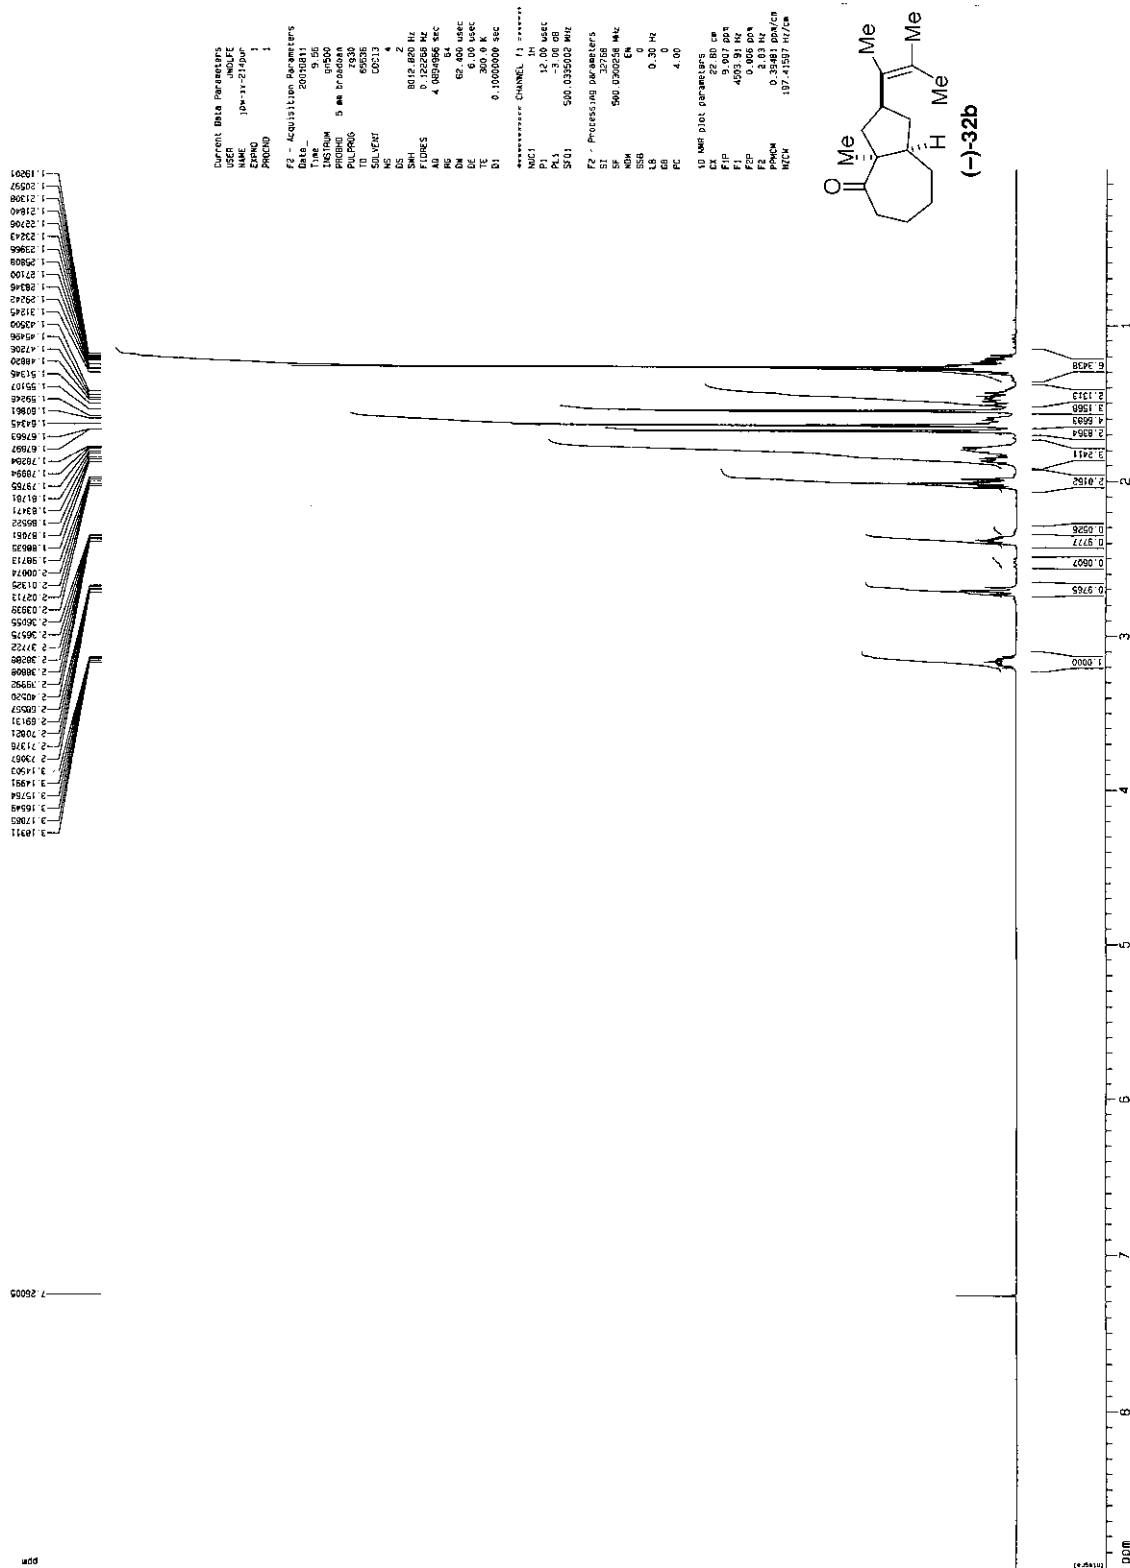

ppm

13C spectrum with 1H decoupling

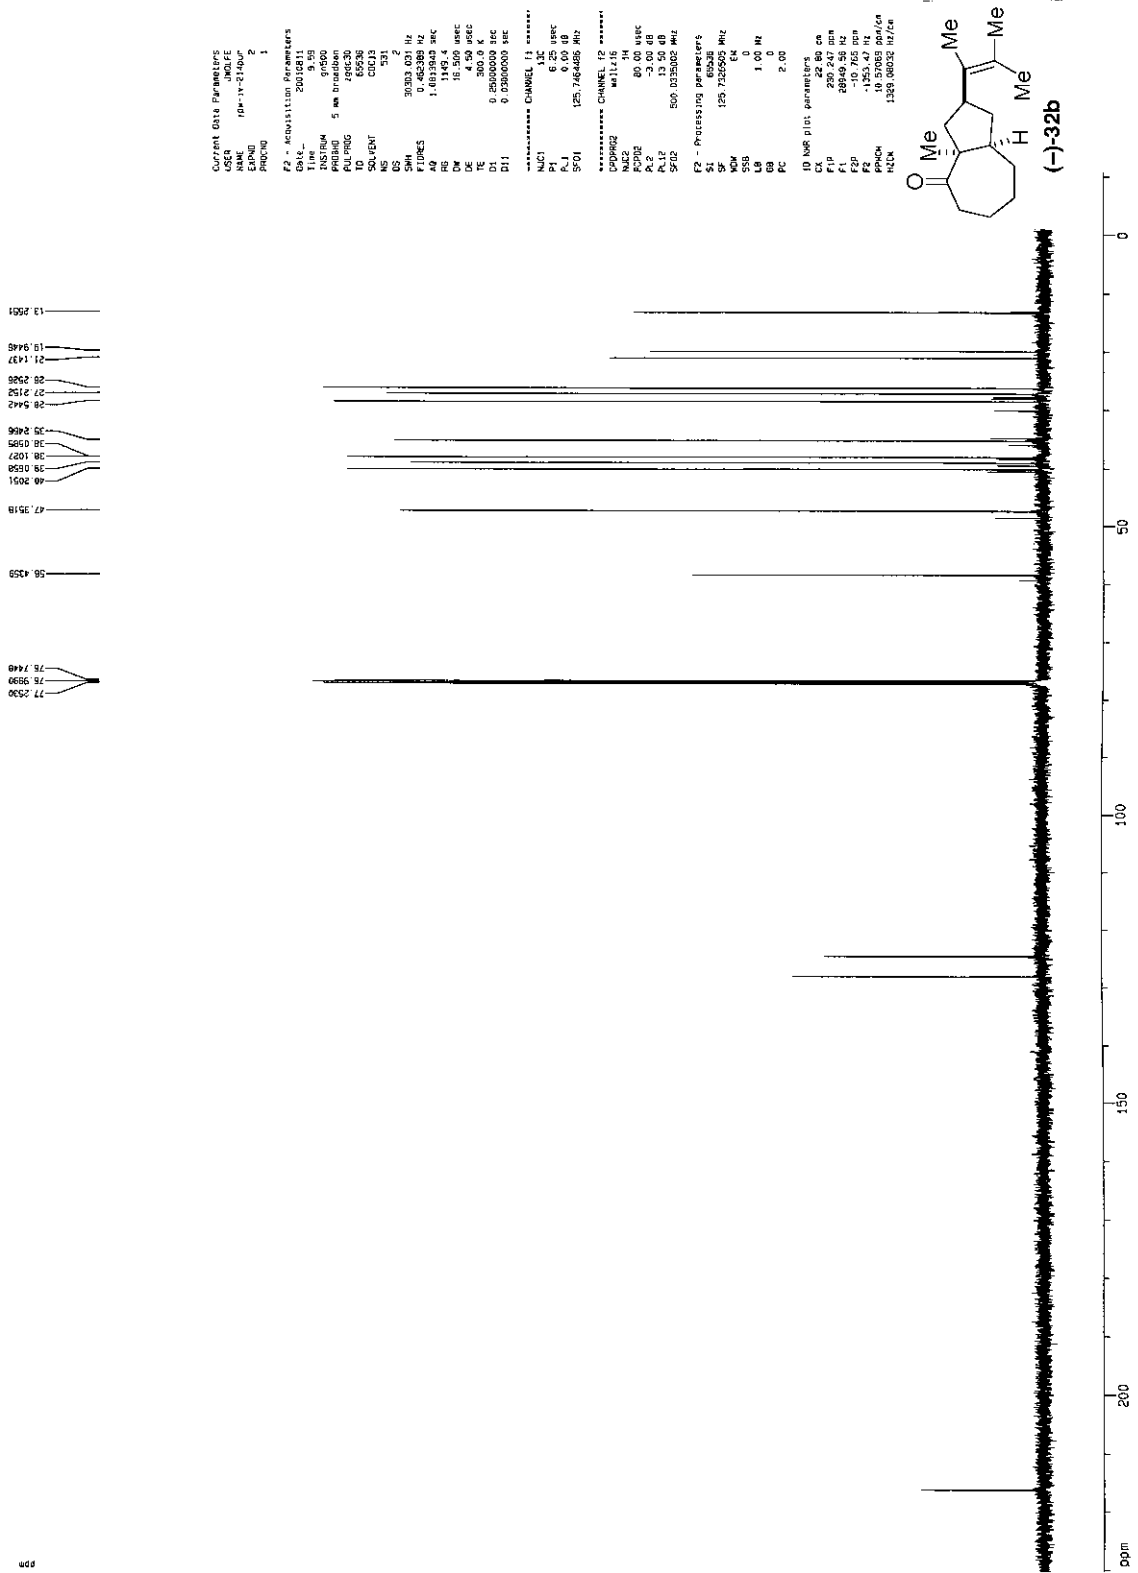

Data File D:\DATA\JPW\IV109.D

Sample Name: JPWRAC2

0%IPA/HX; ODH: .85 mL/min kaw ODH COLUMN

```

=====
Injection Date   : 2/28/02 3:03:53 PM
Sample Name     : JPWRAC2
Acq. Operator   : JPW
Location        : Vial 51
Inj Volume      : 5 µl
Acq. Method     : D:\METHODS\JPW1.M
Last changed    : 2/28/02 3:02:42 PM by JPW
Analysis Method : D:\METHODS\JPW1.M
Last changed    : 2/28/02 3:42:30 PM by JPW
                  (modified after loading)
=====

```

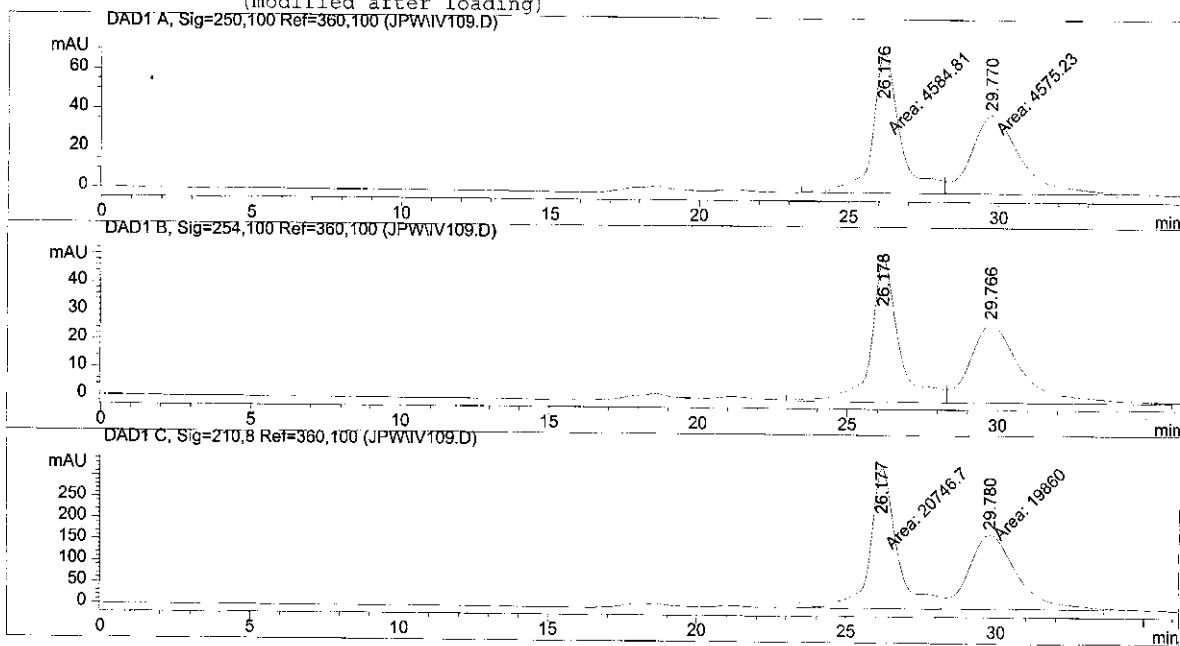

```

=====
Area Percent Report
=====

```

```

Sorted By       : Signal
Multiplier      : 1.0000
Dilution        : 1.0000

```

Signal 1: DAD1 A, Sig=250,100 Ref=360,100

| Peak # | RetTime [min] | Type | Width [min] | Area [mAU*s] | Height [mAU] | Area %  |
|--------|---------------|------|-------------|--------------|--------------|---------|
| 1      | 26.176        | MF   | 1.0697      | 4584.80615   | 71.43219     | 50.0523 |
| 2      | 29.770        | FM   | 1.9113      | 4575.23291   | 39.89681     | 49.9477 |

```
Totals :                9160.03906  111.32900
```

Results obtained with enhanced integrator!

ODH  
0.2 mL/min  
0.5% IPA/Hexane

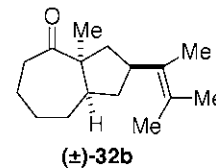

e D:\DATA\JPW\IV109.D

Sample Name: JPWRAC2

Signal 2: DAD1 B, Sig=254,100 Ref=360,100

| Peak # | RetTime [min] | Type | Width [min] | Area [mAU*s] | Height [mAU] | Area %  |
|--------|---------------|------|-------------|--------------|--------------|---------|
| 1      | 26.178        | VV   | 0.9617      | 3349.56909   | 50.25050     | 49.9616 |
| 2      | 29.766        | VB   | 1.7047      | 3354.72241   | 27.94302     | 50.0384 |

Totals : 6704.29150 78.19351

Results obtained with enhanced integrator!

Signal 3: DAD1 C, Sig=210,8 Ref=360,100

| Peak # | RetTime [min] | Type | Width [min] | Area [mAU*s] | Height [mAU] | Area %  |
|--------|---------------|------|-------------|--------------|--------------|---------|
| 1      | 26.177        | MF   | 1.0513      | 2.07467e4    | 328.89185    | 51.0919 |
| 2      | 29.780        | FM   | 1.8842      | 1.98600e4    | 175.67279    | 48.9081 |

Totals : 4.06067e4 504.56464

Results obtained with enhanced integrator!

\*\*\* End of Report \*\*\*

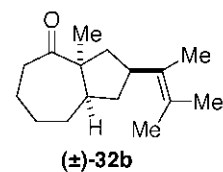

Data File D:\DATA\JPW\IV109.D

Sample Name: JPWRAC2

0%IPA/HX; ODH: .85 mL/min kaw ODH COLUMN

```

=====
Injection Date   : 2/28/02 3:44:53 PM
Sample Name     : JPWRAC2
Acq. Operator   : JPW
Location        : Vial 61
Inj Volume     : 5 µl

Acq. Method     : D:\METHODS\JPW1.M
Last changed    : 2/28/02 3:42:30 PM by JPW
Analysis Method : C:\HPCHEM\1\METHODS\BJB.M
Last changed    : 2/28/02 4:45:33 PM by brenda
                  (modified after loading)
=====

```

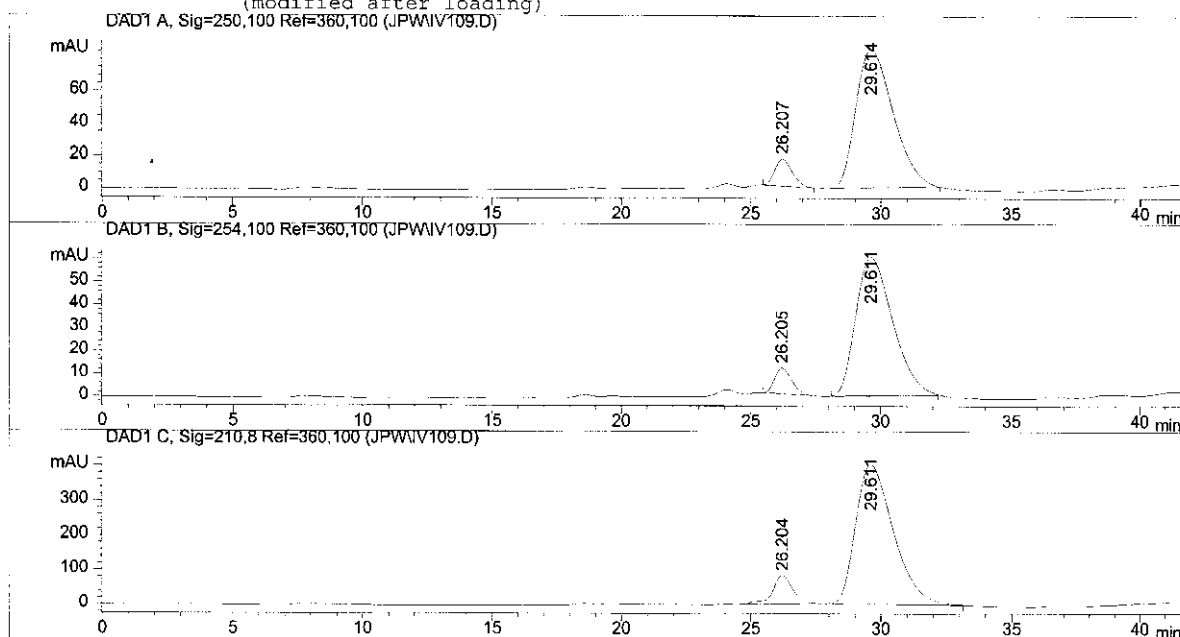

```

=====
Area Percent Report
=====

```

```

Sorted By       : Signal
Multiplier      : 1.0000
Dilution        : 1.0000

```

Signal 1: DAD1 A, Sig=250,100 Ref=360,100

| Peak # | RetTime [min] | Type | Width [min] | Area [mAU*s] | Height [mAU] | Area %  |
|--------|---------------|------|-------------|--------------|--------------|---------|
| 1      | 26.207        | BB   | 0.7150      | 769.20435    | 16.58660     | 8.2103  |
| 2      | 29.614        | BB   | 1.4625      | 8599.58301   | 86.15791     | 91.7897 |

Totals : 9368.78735 102.74451

Results obtained with enhanced integrator!

OB-H  
0.2 mL/min  
0.5% IPA/Hexane  
JPW-IV-71

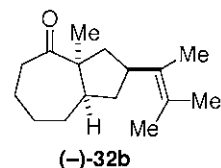



file D:\DATA\JPW\IV109.D

Sample Name: JPWRAC2

Signal 2: DAD1 B, Sig=254,100 Ref=360,100

| Peak # | RetTime [min] | Type | Width [min] | Area [mAU*s] | Height [mAU] | Area %  |
|--------|---------------|------|-------------|--------------|--------------|---------|
| 1      | 26.205        | BB   | 0.6964      | 524.20502    | 11.35808     | 8.0922  |
| 2      | 29.611        | BB   | 1.4845      | 5953.70264   | 60.27113     | 91.9078 |

Totals : 6477.90765 71.62922

Results obtained with enhanced integrator!

Signal 3: DAD1 C, Sig=210,8 Ref=360,100

| Peak # | RetTime [min] | Type | Width [min] | Area [mAU*s] | Height [mAU] | Area %  |
|--------|---------------|------|-------------|--------------|--------------|---------|
| 1      | 26.204        | BB   | 0.8165      | 4508.89697   | 82.39099     | 9.9870  |
| 2      | 29.611        | BB   | 1.5449      | 4.06386e4    | 402.16010    | 90.0130 |

Totals : 4.51475e4 484.55109

Results obtained with enhanced integrator!

=====  
\*\*\* End of Report \*\*\*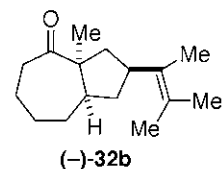

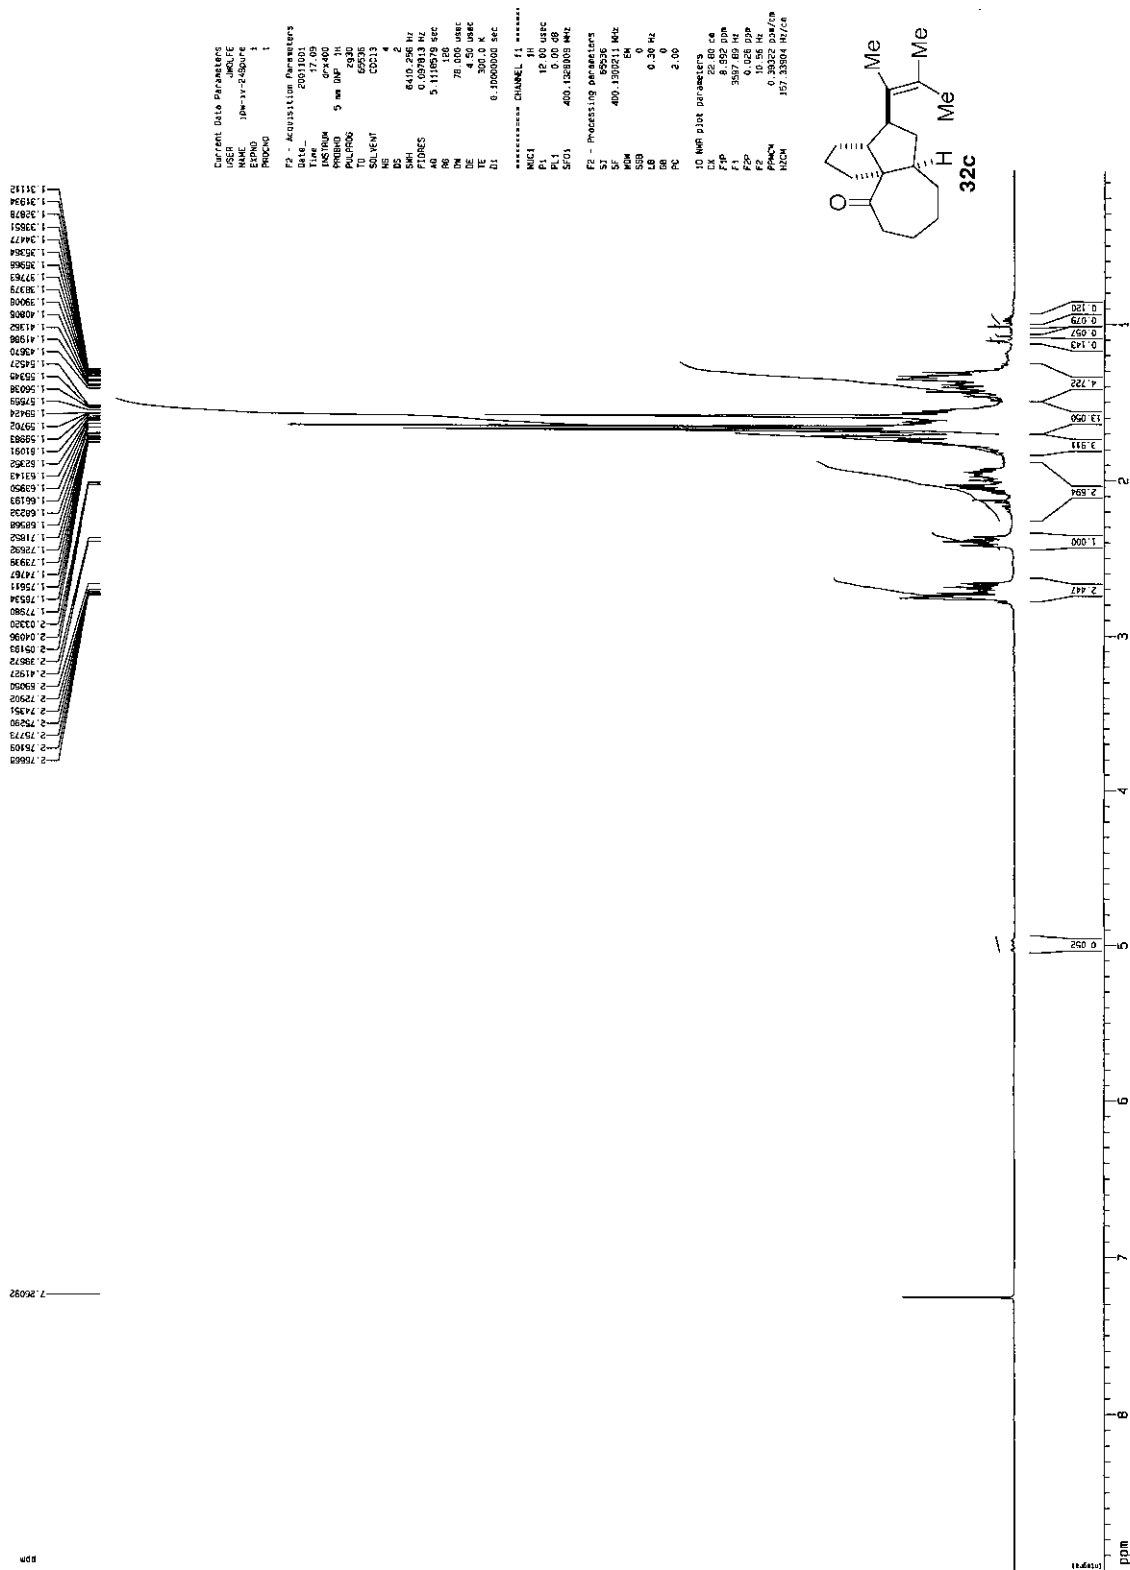

<sup>13</sup>C spectrum with <sup>1</sup>H decoupling

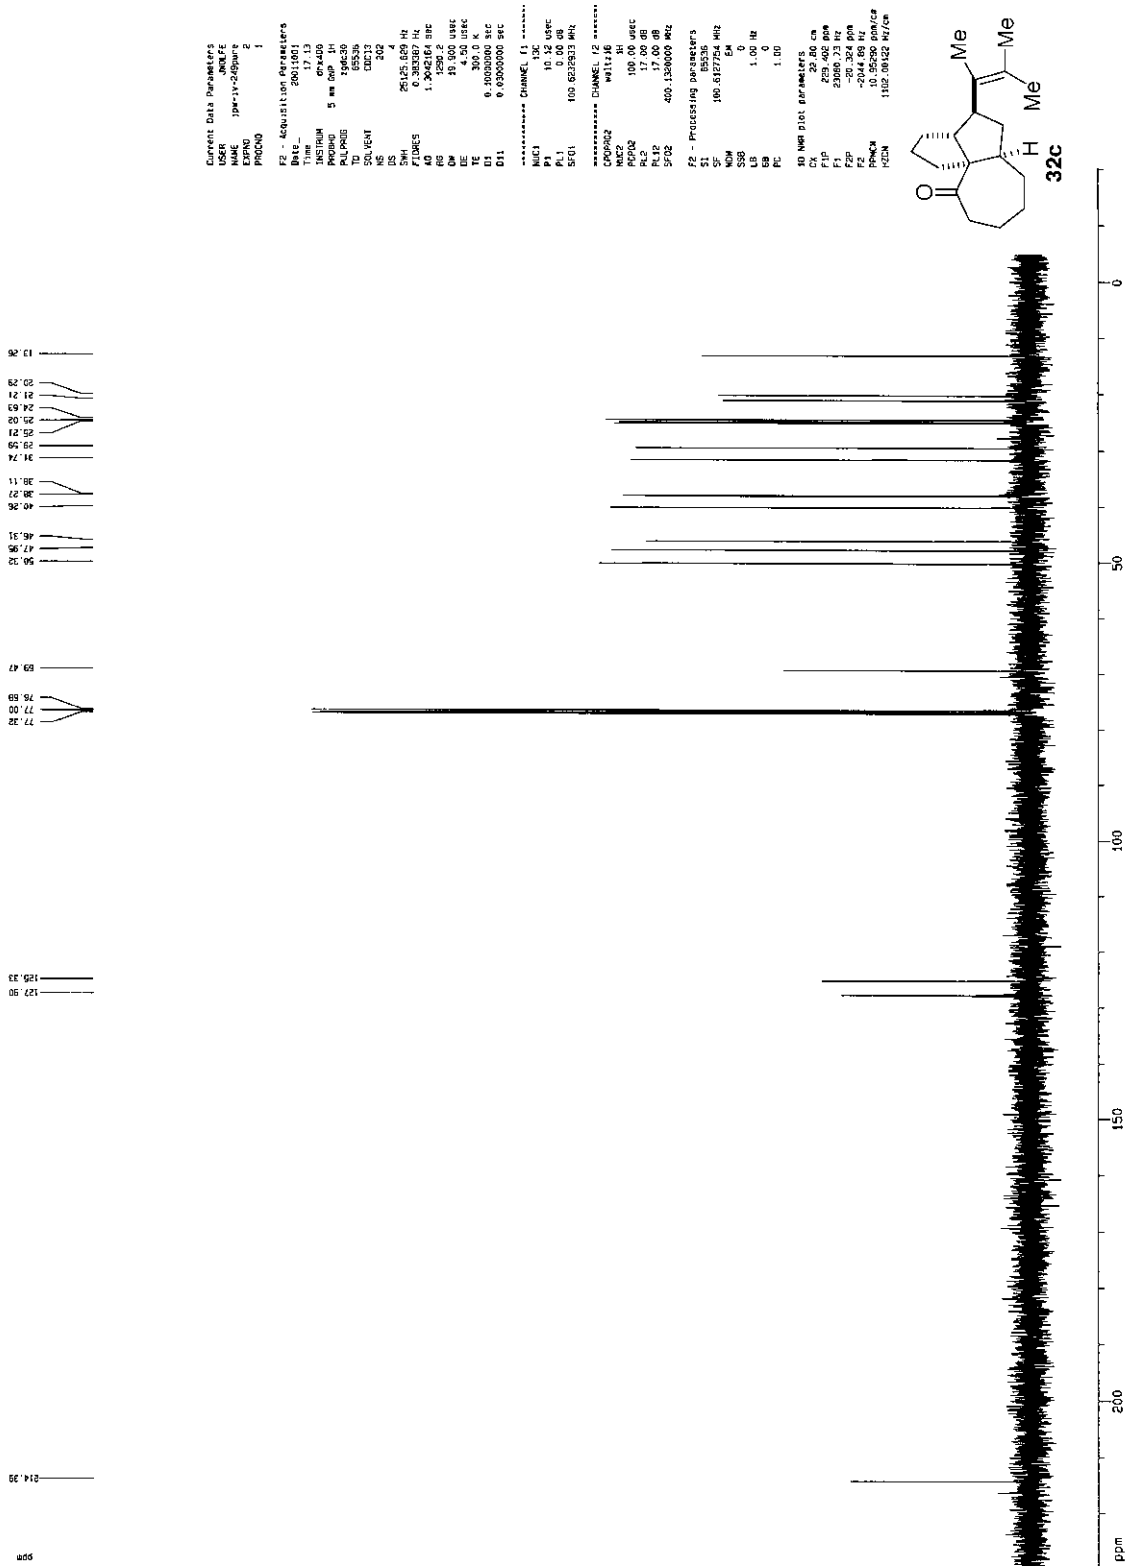

1.10204  
1.17935  
1.20486  
1.23036  
1.25586  
1.28136  
1.30686  
1.33236  
1.35786  
1.38336  
1.40886  
1.43436  
1.45986  
1.48536  
1.51086  
1.53636  
1.56186  
1.58736  
1.61286  
1.63836  
1.66386  
1.68936  
1.71486  
1.74036  
1.76586  
1.79136  
1.81686  
1.84236  
1.86786  
1.89336  
1.91886  
1.94436  
1.96986  
1.99536  
2.02086  
2.04636  
2.07186  
2.09736  
2.12286  
2.14836  
2.17386  
2.19936  
2.22486  
2.25036  
2.27586  
2.30136  
2.32686  
2.35236  
2.37786  
2.40336  
2.42886  
2.45436  
2.47986  
2.50536  
2.53086  
2.55636  
2.58186  
2.60736  
2.63286  
2.65836  
2.68386  
2.70936  
2.73486  
2.76036  
2.78586  
2.81136  
2.83686  
2.86236  
2.88786  
2.91336  
2.93886  
2.96436  
2.98986  
3.01536  
3.04086  
3.06636  
3.09186  
3.11736  
3.14286  
3.16836  
3.19386  
3.21936  
3.24486  
3.27036  
3.29586  
3.32136  
3.34686  
3.37236  
3.39786  
3.42336  
3.44886  
3.47436  
3.50036  
3.52586  
3.55136  
3.57686  
3.60236  
3.62786  
3.65336  
3.67886  
3.70436  
3.72986  
3.75536  
3.78086  
3.80636  
3.83186  
3.85736  
3.88286  
3.90836  
3.93386  
3.95936  
3.98486  
4.01036  
4.03586  
4.06136  
4.08686  
4.11236  
4.13786  
4.16336  
4.18886  
4.21436  
4.23986  
4.26536  
4.29086  
4.31636  
4.34186  
4.36736  
4.39286  
4.41836  
4.44386  
4.46936  
4.49486  
4.52036  
4.54586  
4.57136  
4.59686  
4.62236  
4.64786  
4.67336  
4.69886  
4.72436  
4.74986  
4.77536  
4.80086  
4.82636  
4.85186  
4.87736  
4.90286  
4.92836  
4.95386  
4.97936  
5.00486  
5.03036  
5.05586  
5.08136  
5.10686  
5.13236  
5.15786  
5.18336  
5.20886  
5.23436  
5.25986  
5.28536  
5.31086  
5.33636  
5.36186  
5.38736  
5.41286  
5.43836  
5.46386  
5.48936  
5.51486  
5.54036  
5.56586  
5.59136  
5.61686  
5.64236  
5.66786  
5.69336  
5.71886  
5.74436  
5.76986  
5.79536  
5.82086  
5.84636  
5.87186  
5.89736  
5.92286  
5.94836  
5.97386  
5.99936  
6.02486  
6.05036  
6.07586  
6.10136  
6.12686  
6.15236  
6.17786  
6.20336  
6.22886  
6.25436  
6.27986  
6.30536  
6.33086  
6.35636  
6.38186  
6.40736  
6.43286  
6.45836  
6.48386  
6.50936  
6.53486  
6.56036  
6.58586  
6.61136  
6.63686  
6.66236  
6.68786  
6.71336  
6.73886  
6.76436  
6.78986  
6.81536  
6.84086  
6.86636  
6.89186  
6.91736  
6.94286  
6.96836  
6.99386  
7.01936  
7.04486  
7.07036  
7.09586  
7.12136  
7.14686  
7.17236  
7.19786  
7.22336  
7.24886  
7.27436  
7.29986  
7.32536  
7.35086  
7.37636  
7.40186  
7.42736  
7.45286  
7.47836  
7.50386  
7.52936  
7.55486  
7.58036  
7.60586  
7.63136  
7.65686  
7.68236  
7.70786  
7.73336  
7.75886  
7.78436  
7.80986  
7.83536  
7.86086  
7.88636  
7.91186  
7.93736  
7.96286  
7.98836  
8.01386  
8.03936  
8.06486  
8.09036  
8.11586  
8.14136  
8.16686  
8.19236  
8.21786  
8.24336  
8.26886  
8.29436  
8.31986  
8.34536  
8.37086  
8.39636  
8.42186  
8.44736  
8.47286  
8.49836  
8.52386  
8.54936  
8.57486  
8.60036  
8.62586  
8.65136  
8.67686  
8.70236  
8.72786  
8.75336  
8.77886  
8.80436  
8.82986  
8.85536  
8.88086  
8.90636  
8.93186  
8.95736  
8.98286  
9.00836  
9.03386  
9.05936  
9.08486  
9.11036  
9.13586  
9.16136  
9.18686  
9.21236  
9.23786  
9.26336  
9.28886  
9.31436  
9.33986  
9.36536  
9.39086  
9.41636  
9.44186  
9.46736  
9.49286  
9.51836  
9.54386  
9.56936  
9.59486  
9.62036  
9.64586  
9.67136  
9.69686  
9.72236  
9.74786  
9.77336  
9.79886  
9.82436  
9.84986  
9.87536  
9.90086  
9.92636  
9.95186  
9.97736  
10.00286  
10.02836  
10.05386  
10.07936  
10.10486  
10.13036  
10.15586  
10.18136  
10.20686  
10.23236  
10.25786  
10.28336  
10.30886  
10.33436  
10.35986  
10.38536  
10.41086  
10.43636  
10.46186  
10.48736  
10.51286  
10.53836  
10.56386  
10.58936  
10.61486  
10.64036  
10.66586  
10.69136  
10.71686  
10.74236  
10.76786  
10.79336  
10.81886  
10.84436  
10.86986  
10.89536  
10.92086  
10.94636  
10.97186  
10.99736  
11.02286  
11.04836  
11.07386  
11.09936  
11.12486  
11.15036  
11.17586  
11.20136  
11.22686  
11.25236  
11.27786  
11.30336  
11.32886  
11.35436  
11.37986  
11.40536  
11.43086  
11.45636  
11.48186  
11.50736  
11.53286  
11.55836  
11.58386  
11.60936  
11.63486  
11.66036  
11.68586  
11.71136  
11.73686  
11.76236  
11.78786  
11.81336  
11.83886  
11.86436  
11.88986  
11.91536  
11.94086  
11.96636  
11.99186  
12.01736  
12.04286  
12.06836  
12.09386  
12.11936  
12.14486  
12.17036  
12.19586  
12.22136  
12.24686  
12.27236  
12.29786  
12.32336  
12.34886  
12.37436  
12.39986  
12.42536  
12.45086  
12.47636  
12.50186  
12.52736  
12.55286  
12.57836  
12.60386  
12.62936  
12.65486  
12.68036  
12.70586  
12.73136  
12.75686  
12.78236  
12.80786  
12.83336  
12.85886  
12.88436  
12.90986  
12.93536  
12.96086  
12.98636  
13.01186  
13.03736  
13.06286  
13.08836  
13.11386  
13.13936  
13.16486  
13.19036  
13.21586  
13.24136  
13.26686  
13.29236  
13.31786  
13.34336  
13.36886  
13.39436  
13.41986  
13.44536  
13.47086  
13.49636  
13.52186  
13.54736  
13.57286  
13.59836  
13.62386  
13.64936  
13.67486  
13.70036  
13.72586  
13.75136  
13.77686  
13.80236  
13.82786  
13.85336  
13.87886  
13.90436  
13.92986  
13.95536  
13.98086  
14.00636  
14.03186  
14.05736  
14.08286  
14.10836  
14.13386  
14.15936  
14.18486  
14.21036  
14.23586  
14.26136  
14.28686  
14.31236  
14.33786  
14.36336  
14.38886  
14.41436  
14.43986  
14.46536  
14.49086  
14.51636  
14.54186  
14.56736  
14.59286  
14.61836  
14.64386  
14.66936  
14.69486  
14.72036  
14.74586  
14.77136  
14.79686  
14.82236  
14.84786  
14.87336  
14.89886  
14.92436  
14.94986  
14.97536  
15.00086  
15.02636  
15.05186  
15.07736  
15.10286  
15.12836  
15.15386  
15.17936  
15.20486  
15.23036  
15.25586  
15.28136  
15.30686  
15.33236  
15.35786  
15.38336  
15.40886  
15.43436  
15.45986  
15.48536  
15.51086  
15.53636  
15.56186  
15.58736  
15.61286  
15.63836  
15.66386  
15.68936  
15.71486  
15.74036  
15.76586  
15.79136  
15.81686  
15.84236  
15.86786  
15.89336  
15.91886  
15.94436  
15.96986  
15.99536  
16.02086  
16.04636  
16.07186  
16.09736  
16.12286  
16.14836  
16.17386  
16.19936  
16.22486  
16.25036  
16.27586  
16.30136  
16.32686  
16.35236  
16.37786  
16.40336  
16.42886  
16.45436  
16.47986  
16.50536  
16.53086  
16.55636  
16.58186  
16.60736  
16.63286  
16.65836  
16.68386  
16.70936  
16.73486  
16.76036  
16.78586  
16.81136  
16.83686  
16.86236  
16.88786  
16.91336  
16.93886  
16.96436  
16.98986  
17.01536  
17.04086  
17.06636  
17.09186  
17.11736  
17.14286  
17.16836  
17.19386  
17.21936  
17.24486  
17.27036  
17.29586  
17.32136  
17.34686  
17.37236  
17.39786  
17.42336  
17.44886  
17.47436  
17.49986  
17.52536  
17.55086  
17.57636  
17.60186  
17.62736  
17.65286  
17.67836  
17.70386  
17.72936  
17.75486  
17.78036  
17.80586  
17.83136  
17.85686  
17.88236  
17.90786  
17.93336  
17.95886  
17.98436  
18.00986  
18.03536  
18.06086  
18.08636  
18.11186  
18.13736  
18.16286  
18.18836  
18.21386  
18.23936  
18.26486  
18.29036  
18.31586  
18.34136  
18.36686  
18.39236  
18.41786  
18.44336  
18.46886  
18.49436  
18.51986  
18.54536  
18.57086  
18.59636  
18.62186  
18.64736  
18.67286  
18.69836  
18.72386  
18.74936  
18.77486  
18.80036  
18.82586  
18.85136  
18.87686  
18.90236  
18.92786  
18.95336  
18.97886  
19.00436  
19.02986  
19.05536  
19.08086  
19.10636  
19.13186  
19.15736  
19.18286  
19.20836  
19.23386  
19.25936  
19.28486  
19.31036  
19.33586  
19.36136  
19.38686  
19.41236  
19.43786  
19.46336  
19.48886  
19.51436  
19.53986  
19.56536  
19.59086  
19.61636  
19.64186  
19.66736  
19.69286  
19.71836  
19.74386  
19.76936  
19.79486  
19.82036  
19.84586  
19.87136  
19.89686  
19.92236  
19.94786  
19.97336  
20.00000

Current Data Parameters  
 USER JMW-14-18500's  
 JMW-14-18500's  
 EXPNO 1  
 PROCNO 1  
 F2 - Acquisition Parameters  
 Date\_ 20010311  
 Time 11:03:03  
 INSTRUM spect  
 PULPROG zgpg30  
 TD 65536  
 SOLVENT CDCl3  
 NS 2  
 DS 2  
 SNH 6410.255 Hz  
 FIDRES 0.097613 Hz  
 AQ 5.118279 sec  
 RG 200.2  
 W 4.50 usec  
 DE 7.45 usec  
 TE 300.0 K  
 D1 0.10000000 sec  
 \*\*\*\*\* CHANNEL f1 \*\*\*\*\*  
 NUCL1 13C  
 PL1 12.00 usec  
 PL2 0.00 usec  
 PL3 0.00 usec  
 SFO1 400.1326005 MHz  
 F2 - Processing parameters  
 SI 32768  
 SF 400.1326005 MHz  
 EQ 0  
 EN 0  
 SS 0  
 LB 0.30 Hz  
 GB 0  
 PC 2.00  
 10 MHz Plot Parameters  
 CX 22.80 cm  
 FIP 9.141 ppm  
 F1 5617.61 Hz  
 F2 0.125 ppm  
 PRGCM 0.39412 Hz/cm  
 RZCM 159.22130 Hz/cm

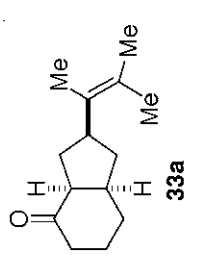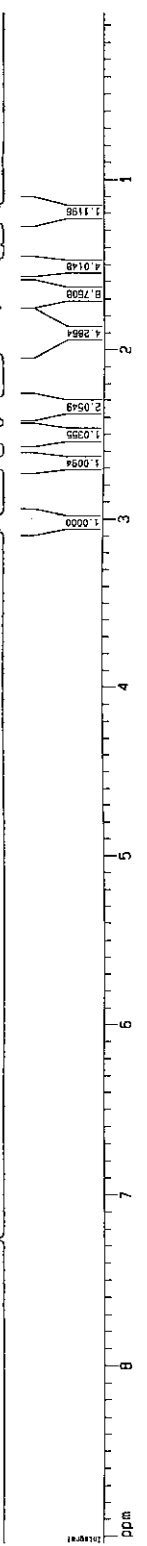

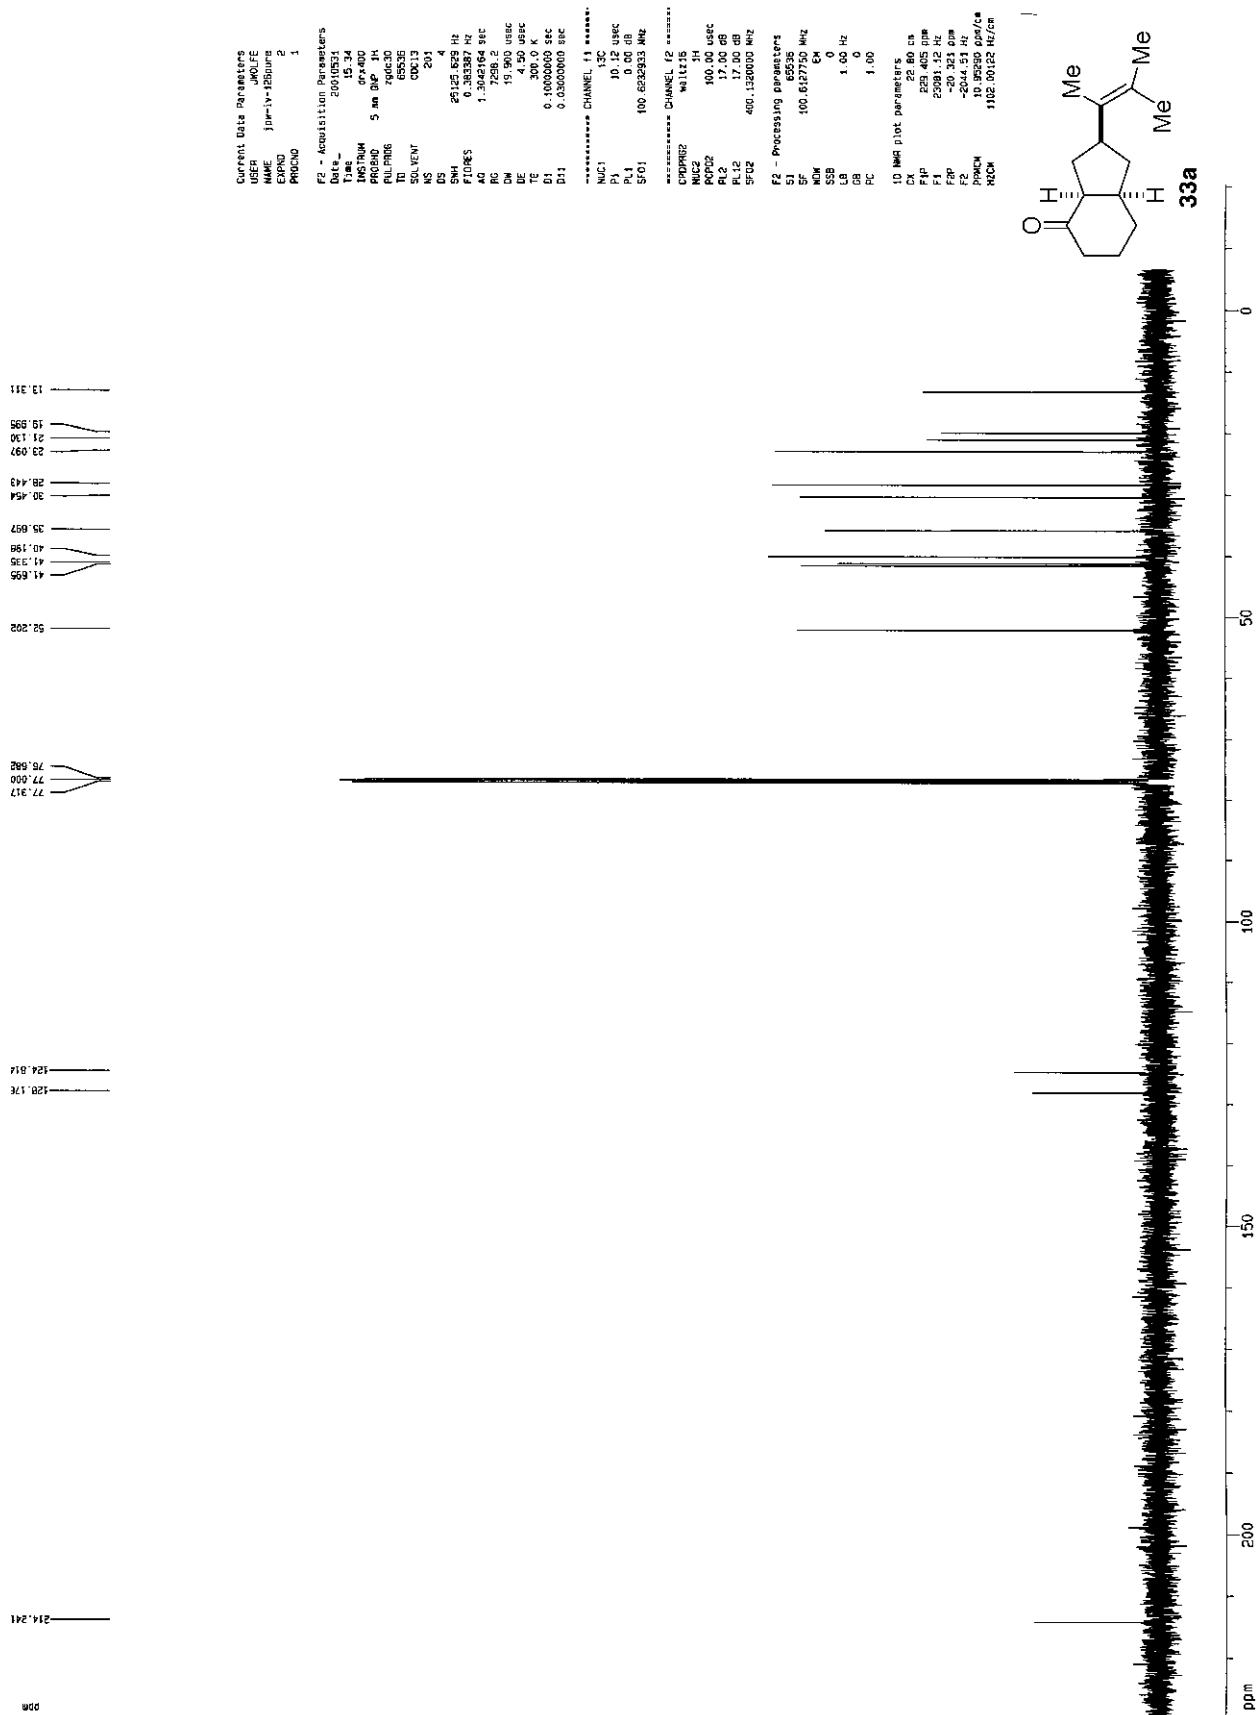

1.23945  
1.29966  
1.31611  
1.32121  
1.32654  
1.34086  
1.37010  
1.51617  
1.58953  
1.58986  
1.60285  
1.63346  
1.63417  
1.66476  
1.85954  
1.88044  
1.90183  
1.91291  
2.07497  
2.08982  
2.23878  
2.25425  
2.27044  
2.29110  
2.34181  
2.47797

Current Data Parameters  
 Name JPM-1V-20100605  
 ExpNo 1  
 PROCNO 1  
 F2 - Acquisition Parameters  
 Date\_ 20100605  
 Time 13:52:33  
 INSTRUM 014000  
 PROBHD 5 mm DNP JH  
 PULPROG zg30  
 TD 65536  
 SOLVENT CDCl3  
 NS 2  
 DS 2  
 SWH 6410.255 Hz  
 FIDRES 0.097613 Hz  
 AQ 5.110579 sec  
 RG 728  
 GB 78  
 PC 12.00 usec  
 DE 4.50 usec  
 TE 300.0 K  
 D1 0.10000000 sec  
 \*\*\*\*\* CHANNEL f1 \*\*\*\*\*  
 NUCl 13C  
 P1 12.00 usec  
 PL1 0.00 dB  
 SFO1 400.1326009 MHz  
 F2 - Processing parameters  
 SI 32768  
 SF 400.1326013 MHz  
 MGW 0  
 EN 0  
 SSB 0  
 LB 0.30 Hz  
 GB 0  
 PC 2.00  
 ID NMR plot parameters  
 CX 22.80 cm  
 FIP 9.000 ppm  
 F1 3804.40 Hz  
 F2 9.000 ppm  
 F3 3.05 Hz  
 FWHM 0.39542 ppm/cm  
 AQCW 158.22130 Hz/cm

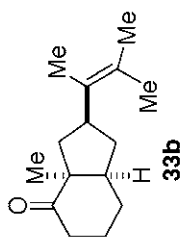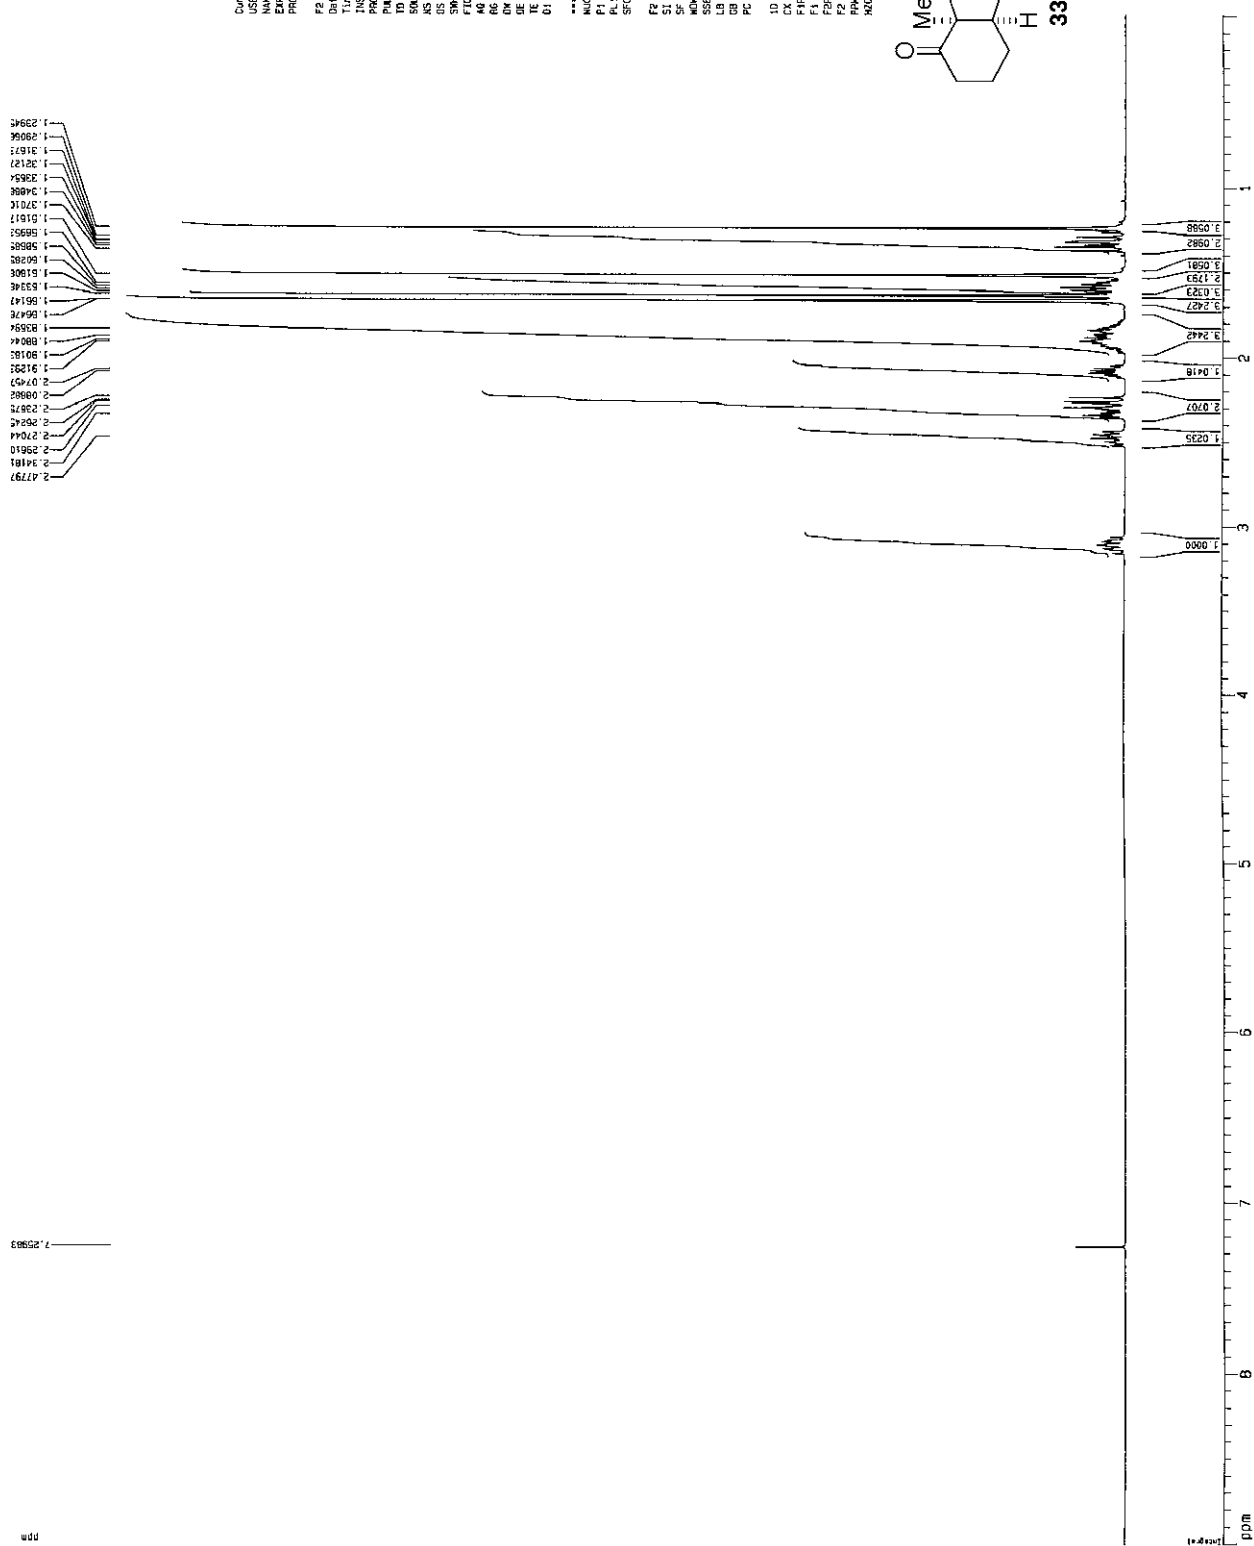

7.25983

ppm

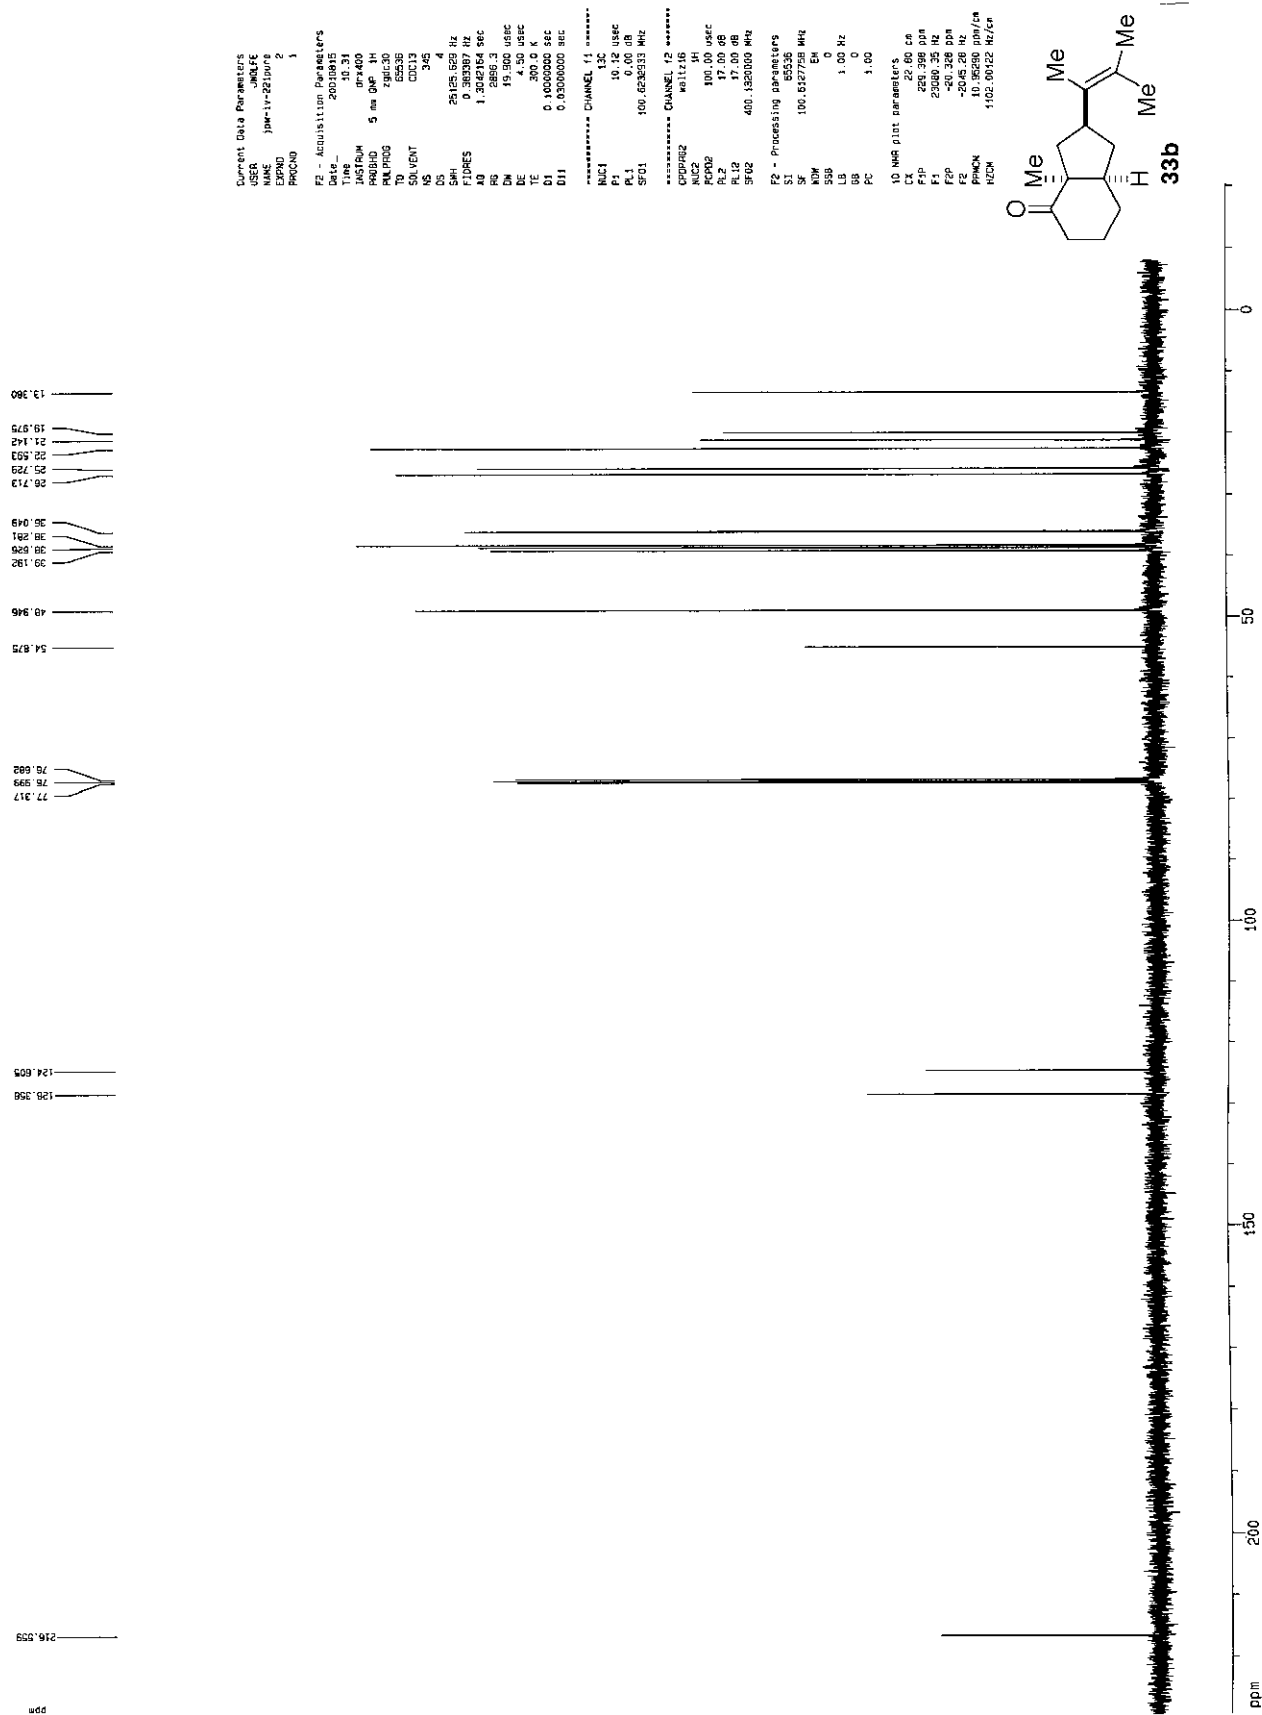

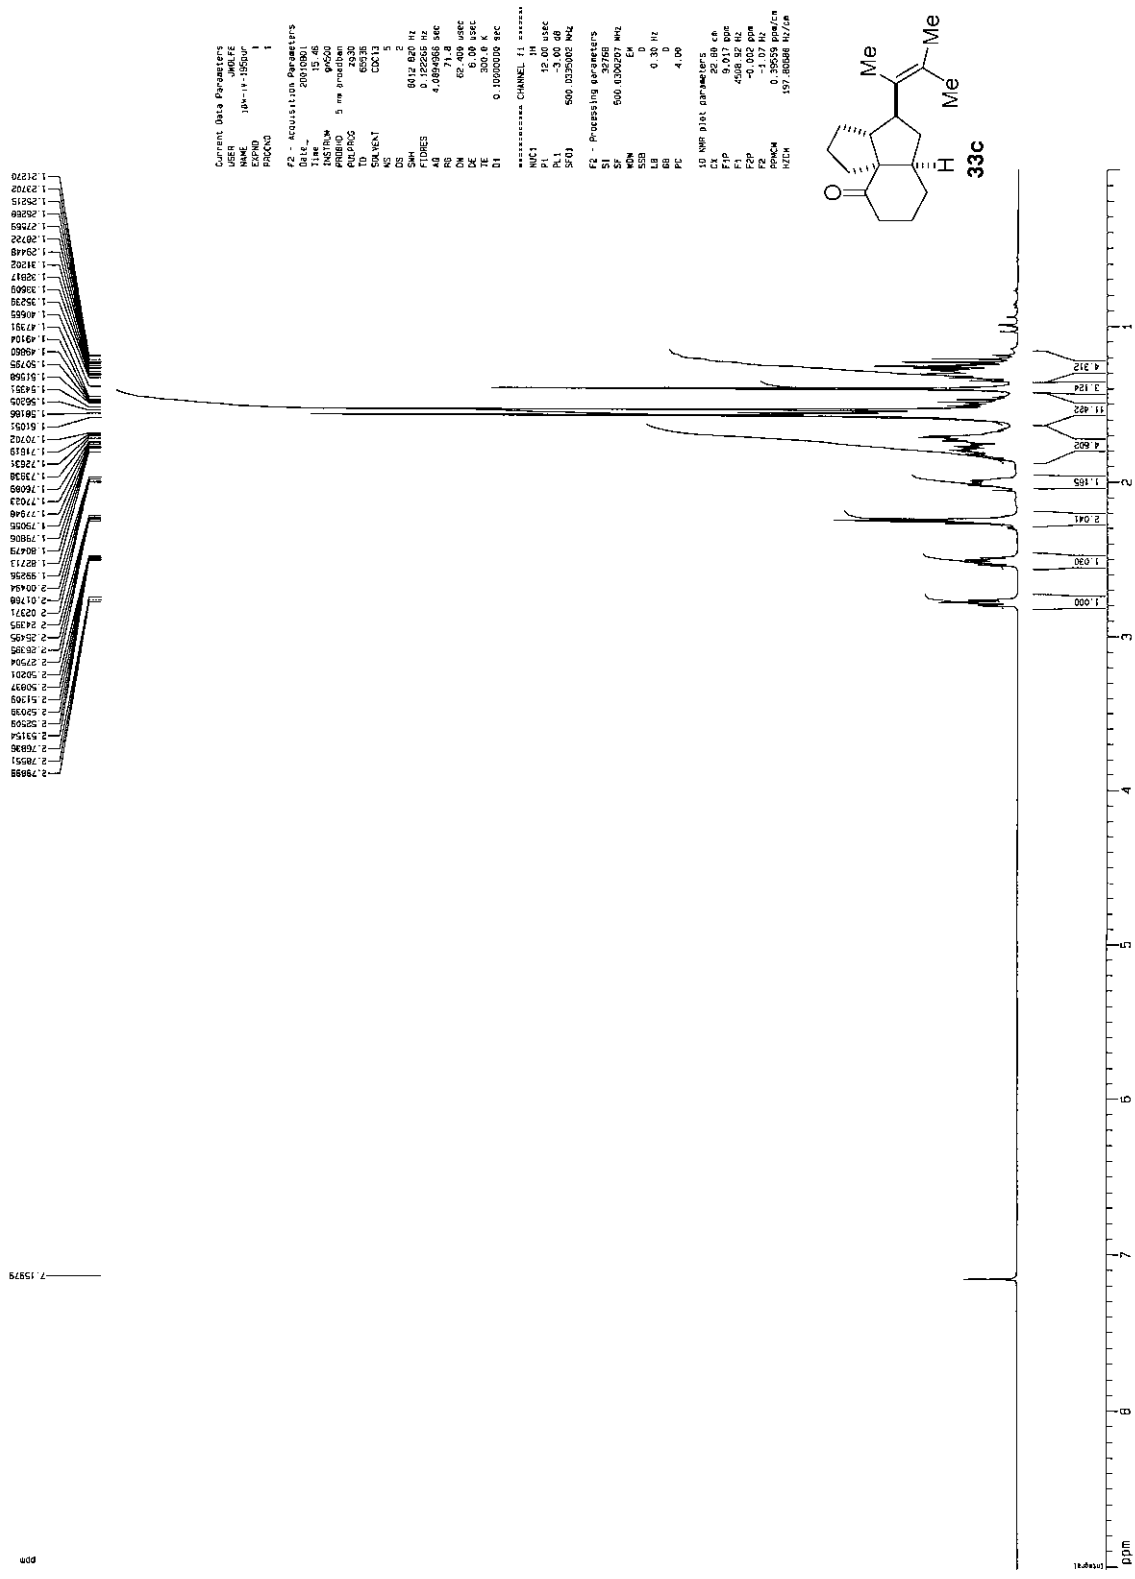



<sup>13</sup>C spectrum with <sup>1</sup>H decoupling

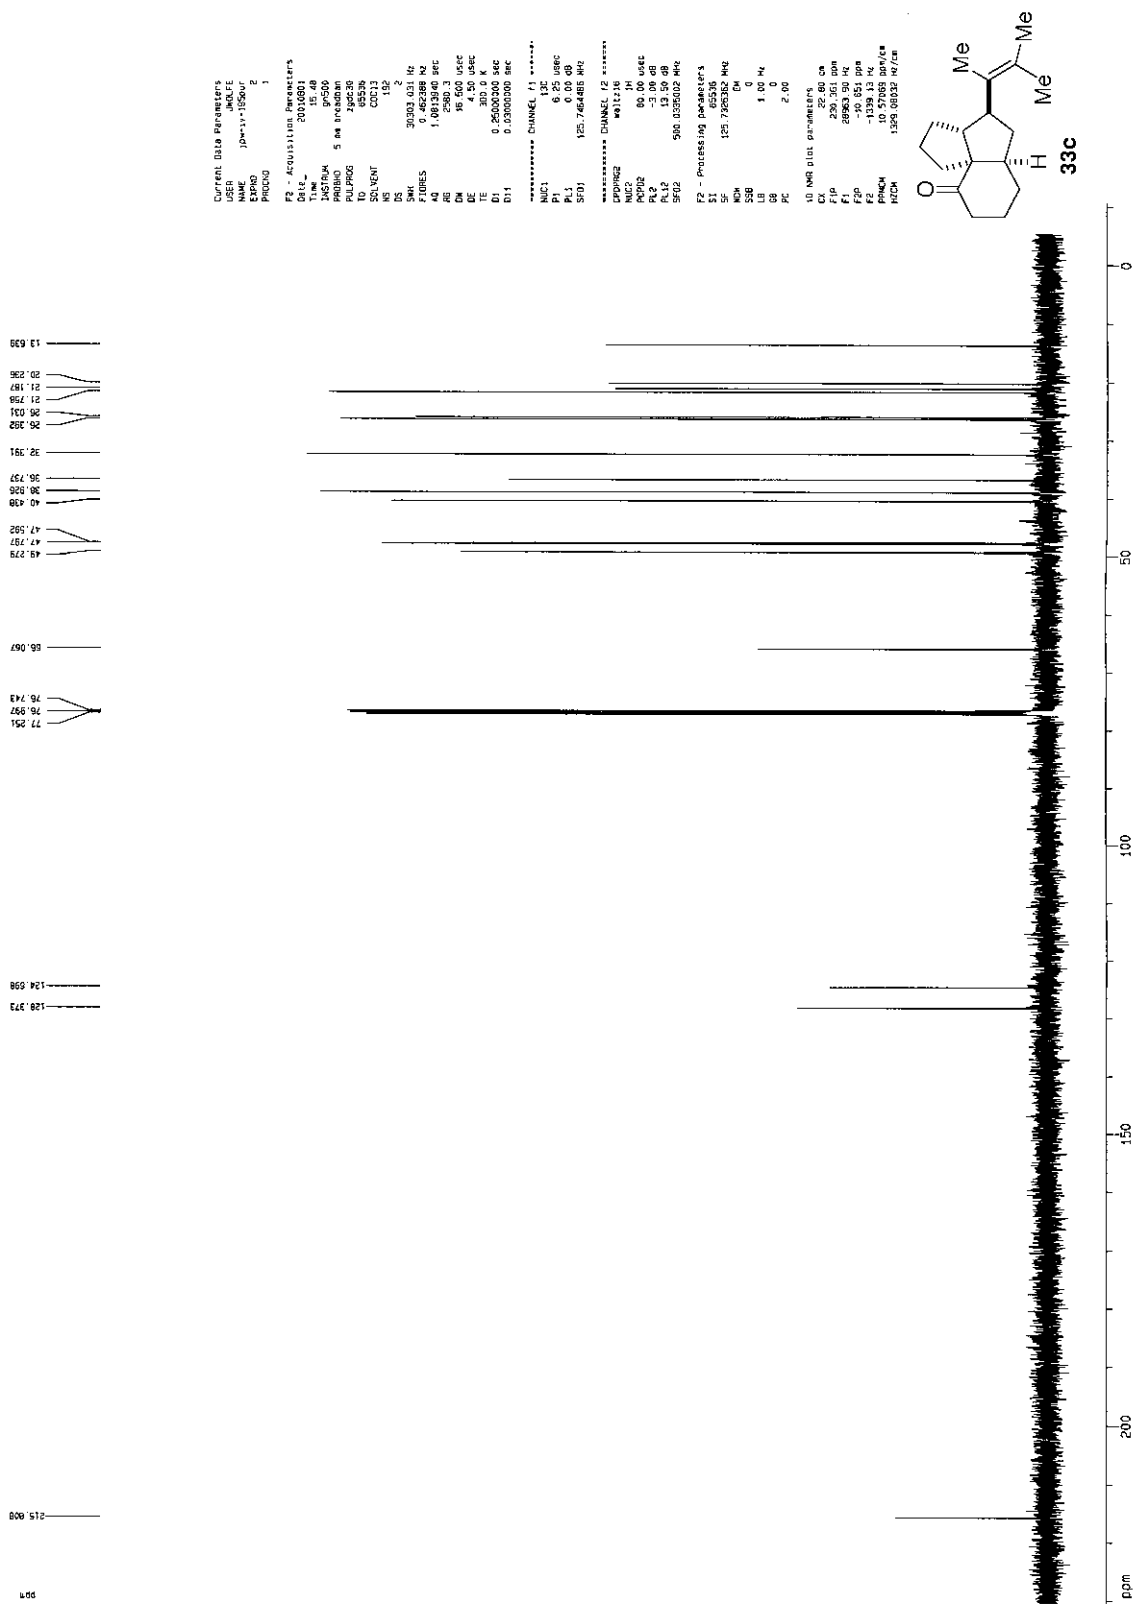

Current Data Parameters  
 USER JMLFE  
 NAME JP-11-15601  
 NMRS 1  
 PROCSS 1

F2 - Acquisition Parameters  
 Date\_ Time 15.48  
 EVAPOR 0  
 INSTRUM P5000  
 PULPROG 5 wa Inversion  
 TOUPOG 2  
 FIDRES 0.65536  
 SOLVENT CDCl3  
 NS 16  
 SM 3000.031 Hz  
 F2FRES 0.462388 Hz  
 AQ 1.0813940 SEC  
 RG 655.36  
 DM 98.660 SEC  
 DE 4.50 USEC  
 TE 300.0 K  
 D1 0.56500000 SEC  
 D11 0.02000000 SEC

\*\*\*\*\* CHANNEL f1 \*\*\*\*\*  
 NU1 13C  
 P1 6.25 USEC  
 PL1 0.00 dB  
 SF1 125.760485 MHz

\*\*\*\*\* CHANNEL f2 \*\*\*\*\*  
 DPDRG2 WALTZ16  
 NU2 1H  
 P2 10.00 USEC  
 PL2 19.00 dB  
 PL12 13.50 dB  
 SF12 500.0326002 MHz

F2 - Processing parameters  
 SI 1  
 SF 125.760362 MHz  
 G 0  
 LB 1.00 Hz  
 GB 0  
 PC 2.00

10 MHz D101 parameters  
 EX 22.80 cm  
 F1 250.051 GHz  
 F2 500.131 GHz  
 F3 750.196 GHz  
 F4 1000.261 GHz  
 F5 1250.326 GHz  
 F6 1500.391 GHz  
 F7 1750.456 GHz  
 F8 2000.521 GHz  
 F9 2250.586 GHz  
 F10 2500.651 GHz  
 F11 2750.716 GHz  
 F12 3000.781 GHz  
 F13 3250.846 GHz  
 F14 3500.911 GHz  
 F15 3750.976 GHz  
 F16 4001.041 GHz  
 F17 4251.106 GHz  
 F18 4501.171 GHz  
 F19 4751.236 GHz  
 F20 5001.301 GHz  
 F21 5251.366 GHz  
 F22 5501.431 GHz  
 F23 5751.496 GHz  
 F24 6001.561 GHz  
 F25 6251.626 GHz  
 F26 6501.691 GHz  
 F27 6751.756 GHz  
 F28 7001.821 GHz  
 F29 7251.886 GHz  
 F30 7501.951 GHz  
 F31 7752.016 GHz  
 F32 8002.081 GHz  
 F33 8252.146 GHz  
 F34 8502.211 GHz  
 F35 8752.276 GHz  
 F36 9002.341 GHz  
 F37 9252.406 GHz  
 F38 9502.471 GHz  
 F39 9752.536 GHz  
 F40 10002.601 GHz  
 F41 10252.666 GHz  
 F42 10502.731 GHz  
 F43 10752.796 GHz  
 F44 11002.861 GHz  
 F45 11252.926 GHz  
 F46 11502.991 GHz  
 F47 11753.056 GHz  
 F48 12003.121 GHz  
 F49 12253.186 GHz  
 F50 12503.251 GHz  
 F51 12753.316 GHz  
 F52 13003.381 GHz  
 F53 13253.446 GHz  
 F54 13503.511 GHz  
 F55 13753.576 GHz  
 F56 14003.641 GHz  
 F57 14253.706 GHz  
 F58 14503.771 GHz  
 F59 14753.836 GHz  
 F60 15003.901 GHz  
 F61 15253.966 GHz  
 F62 15504.031 GHz  
 F63 15754.096 GHz  
 F64 16004.161 GHz  
 F65 16254.226 GHz  
 F66 16504.291 GHz  
 F67 16754.356 GHz  
 F68 17004.421 GHz  
 F69 17254.486 GHz  
 F70 17504.551 GHz  
 F71 17754.616 GHz  
 F72 18004.681 GHz  
 F73 18254.746 GHz  
 F74 18504.811 GHz  
 F75 18754.876 GHz  
 F76 19004.941 GHz  
 F77 19255.006 GHz  
 F78 19505.071 GHz  
 F79 19755.136 GHz  
 F80 20005.201 GHz  
 F81 20255.266 GHz  
 F82 20505.331 GHz  
 F83 20755.396 GHz  
 F84 21005.461 GHz  
 F85 21255.526 GHz  
 F86 21505.591 GHz  
 F87 21755.656 GHz  
 F88 22005.721 GHz  
 F89 22255.786 GHz  
 F90 22505.851 GHz  
 F91 22755.916 GHz  
 F92 23005.981 GHz  
 F93 23256.046 GHz  
 F94 23506.111 GHz  
 F95 23756.176 GHz  
 F96 24006.241 GHz  
 F97 24256.306 GHz  
 F98 24506.371 GHz  
 F99 24756.436 GHz  
 F100 25006.501 GHz

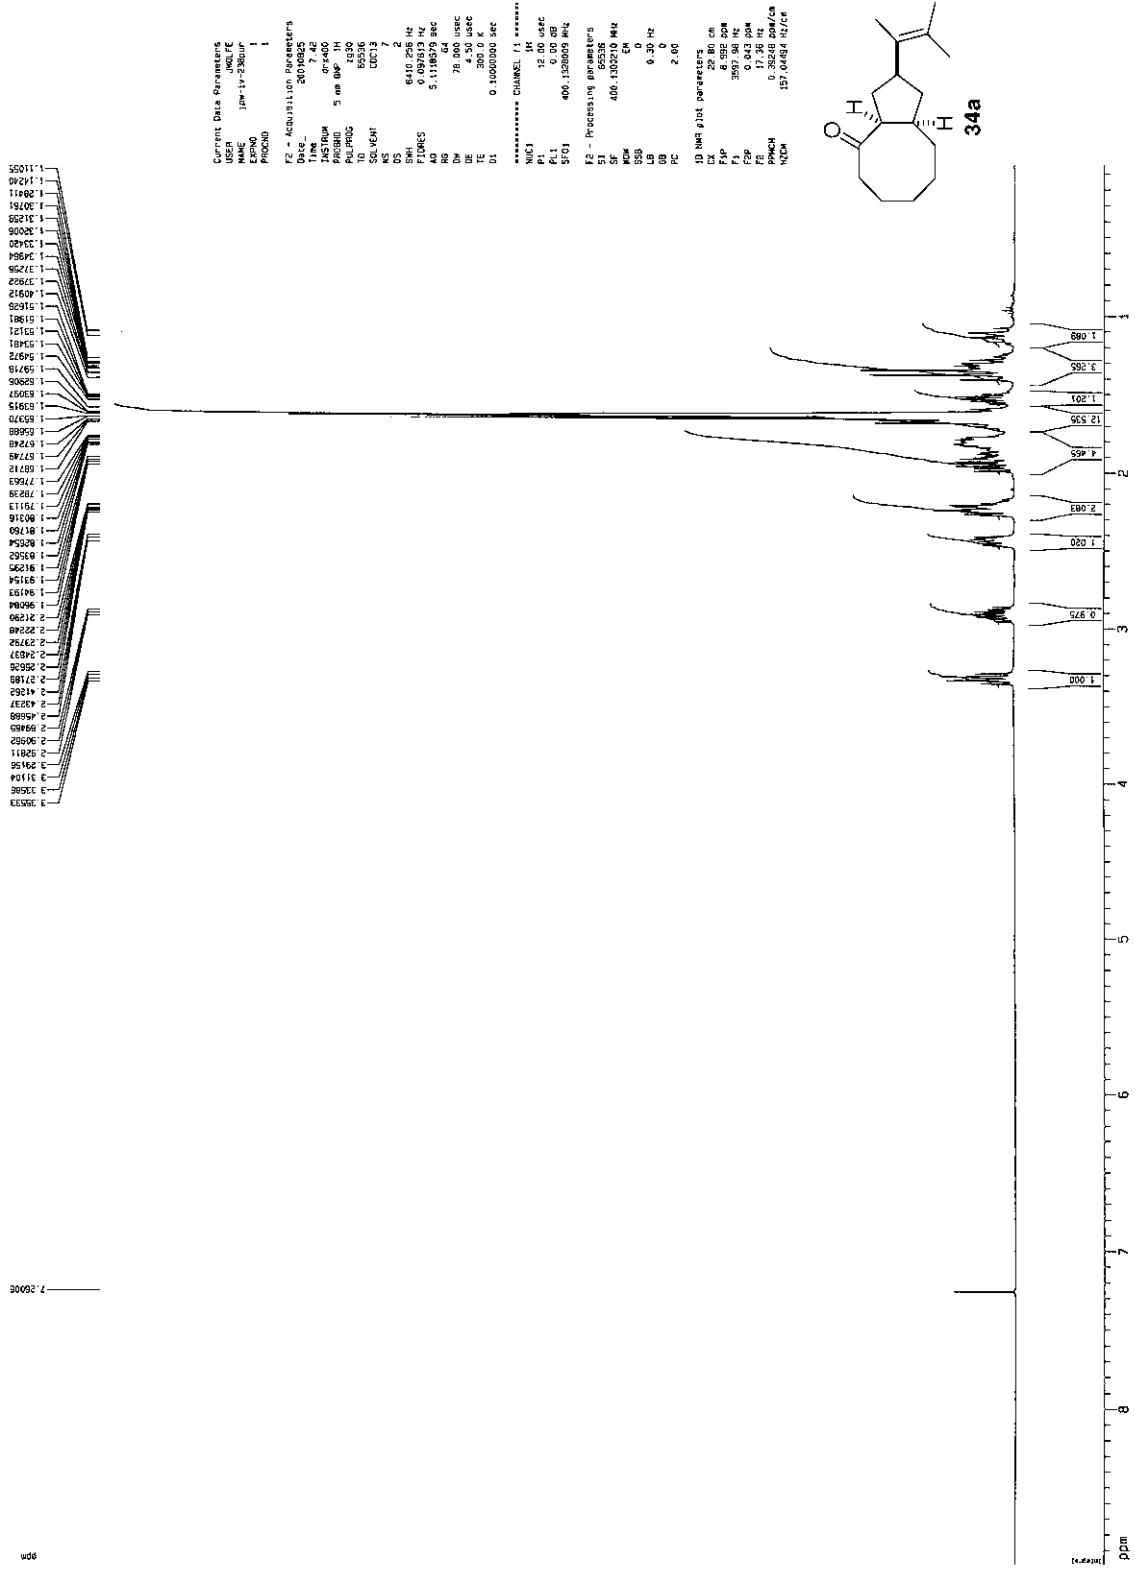

<sup>13</sup>C spectrum with <sup>1</sup>H decoupling

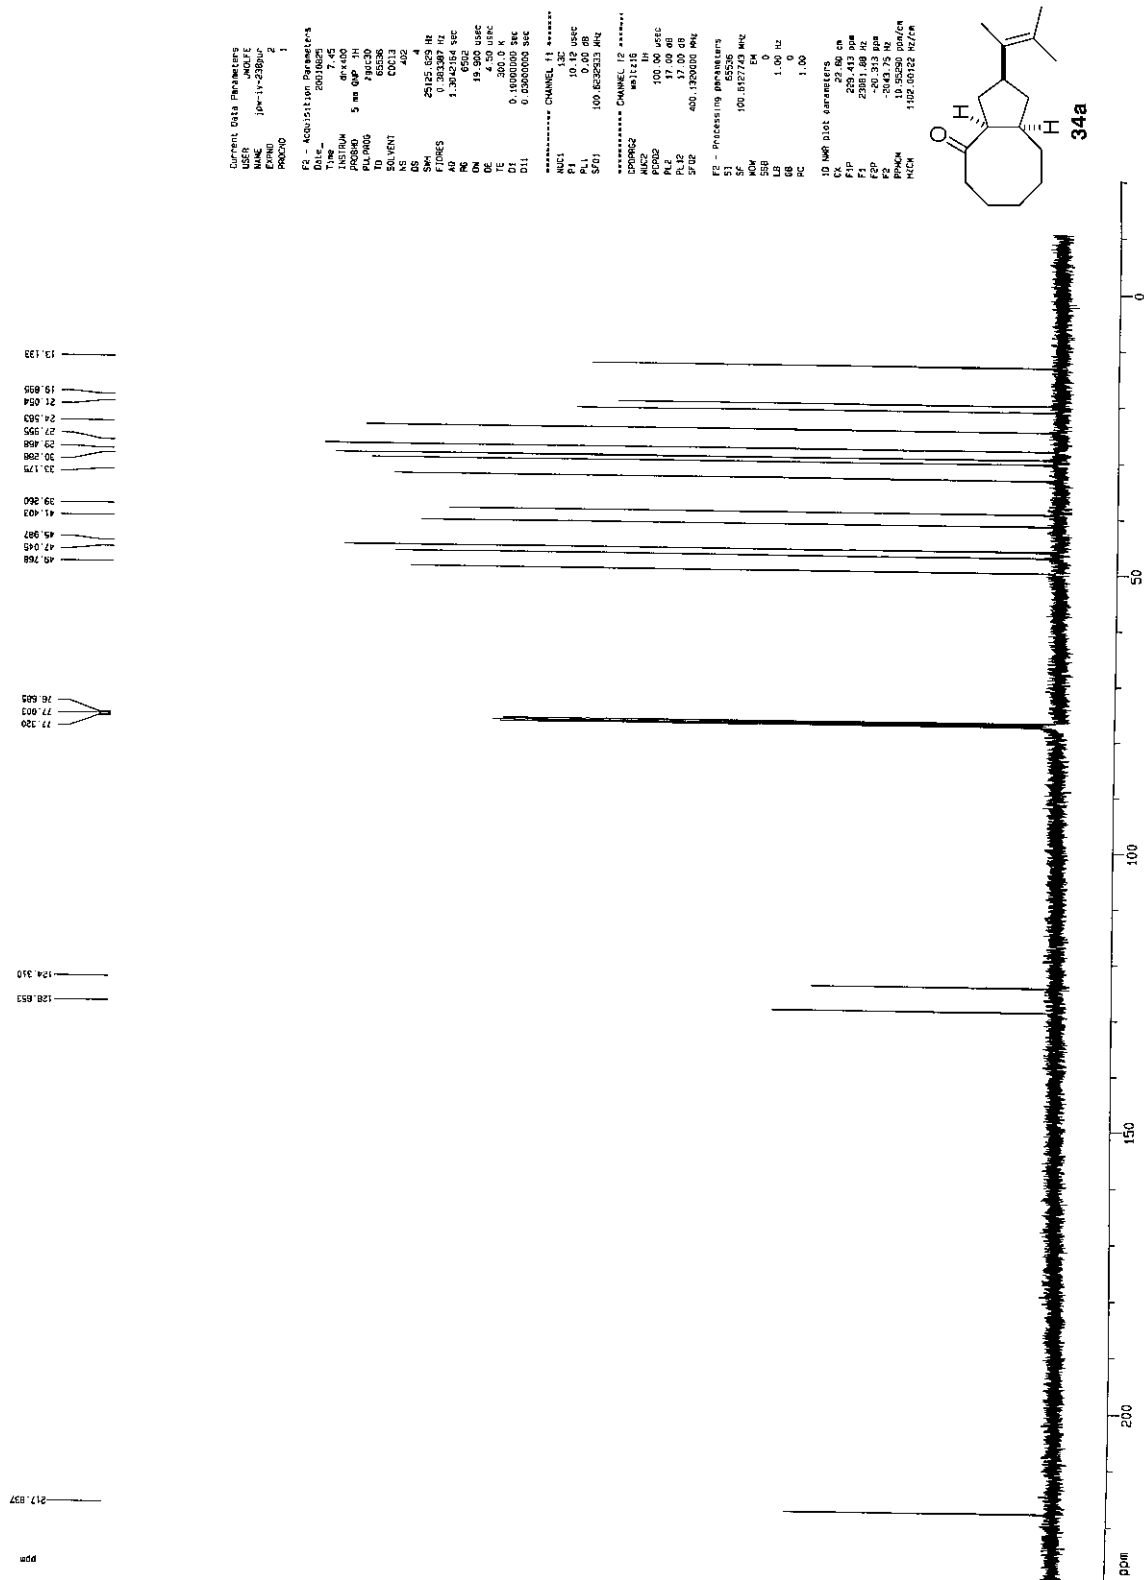

Current Data Parameters  
 NAME JACOZE  
 EXPNO 2  
 PROCNO 1  
 F2 - Acquisition Parameters  
 Date\_ 20010820  
 Time 7.45  
 INSTRUM spect  
 PULPROG zgpg30  
 TO 65.536  
 SOLVENT CDCl3  
 DS 4  
 SWH 25145.829 Hz  
 FIDRES 0.393309 Hz  
 AQ 1.366656 sec  
 RG 658  
 ON 19.500 USEC  
 DE 4.50 USEC  
 TE 300.2 K  
 D1 0.10000000 sec  
 D11 0.03000000 sec  
 \*\*\*\*\* CHANNEL f1 \*\*\*\*\*  
 NUC1 13C  
 P1 10.12 USEC  
 PL1 0.00 dB  
 SFO1 100.626183 MHz  
 \*\*\*\*\* CHANNEL f2 \*\*\*\*\*  
 DPROG2 waltz16  
 P2 10.12 USEC  
 PL2 17.00 dB  
 SFO2 400.142600 MHz  
 F2 - Processing parameters  
 SI 32768  
 SF 100.6127724 MHz  
 WDM 4  
 LB 1.00 Hz  
 GB 0  
 PC 1.00

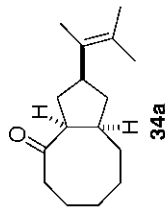

1D NMR list parameters  
 F1p 23.00 cm  
 F1 23081.68 Hz  
 F2p -20.313 ppm  
 F2 -20.313 ppm  
 P1 1.00 sec  
 P2 1.00 sec  
 P3 1.00 sec  
 P4 1.00 sec  
 P5 1.00 sec  
 P6 1.00 sec  
 P7 1.00 sec  
 P8 1.00 sec  
 P9 1.00 sec  
 P10 1.00 sec  
 P11 1.00 sec  
 P12 1.00 sec  
 P13 1.00 sec  
 P14 1.00 sec  
 P15 1.00 sec  
 P16 1.00 sec  
 P17 1.00 sec  
 P18 1.00 sec  
 P19 1.00 sec  
 P20 1.00 sec  
 P21 1.00 sec  
 P22 1.00 sec  
 P23 1.00 sec  
 P24 1.00 sec  
 P25 1.00 sec  
 P26 1.00 sec  
 P27 1.00 sec  
 P28 1.00 sec  
 P29 1.00 sec  
 P30 1.00 sec  
 P31 1.00 sec  
 P32 1.00 sec  
 P33 1.00 sec  
 P34 1.00 sec  
 P35 1.00 sec  
 P36 1.00 sec  
 P37 1.00 sec  
 P38 1.00 sec  
 P39 1.00 sec  
 P40 1.00 sec  
 P41 1.00 sec  
 P42 1.00 sec  
 P43 1.00 sec  
 P44 1.00 sec  
 P45 1.00 sec  
 P46 1.00 sec  
 P47 1.00 sec  
 P48 1.00 sec  
 P49 1.00 sec  
 P50 1.00 sec  
 P51 1.00 sec  
 P52 1.00 sec  
 P53 1.00 sec  
 P54 1.00 sec  
 P55 1.00 sec  
 P56 1.00 sec  
 P57 1.00 sec  
 P58 1.00 sec  
 P59 1.00 sec  
 P60 1.00 sec  
 P61 1.00 sec  
 P62 1.00 sec  
 P63 1.00 sec  
 P64 1.00 sec  
 P65 1.00 sec  
 P66 1.00 sec  
 P67 1.00 sec  
 P68 1.00 sec  
 P69 1.00 sec  
 P70 1.00 sec  
 P71 1.00 sec  
 P72 1.00 sec  
 P73 1.00 sec  
 P74 1.00 sec  
 P75 1.00 sec  
 P76 1.00 sec  
 P77 1.00 sec  
 P78 1.00 sec  
 P79 1.00 sec  
 P80 1.00 sec  
 P81 1.00 sec  
 P82 1.00 sec  
 P83 1.00 sec  
 P84 1.00 sec  
 P85 1.00 sec  
 P86 1.00 sec  
 P87 1.00 sec  
 P88 1.00 sec  
 P89 1.00 sec  
 P90 1.00 sec  
 P91 1.00 sec  
 P92 1.00 sec  
 P93 1.00 sec  
 P94 1.00 sec  
 P95 1.00 sec  
 P96 1.00 sec  
 P97 1.00 sec  
 P98 1.00 sec  
 P99 1.00 sec  
 P100 1.00 sec



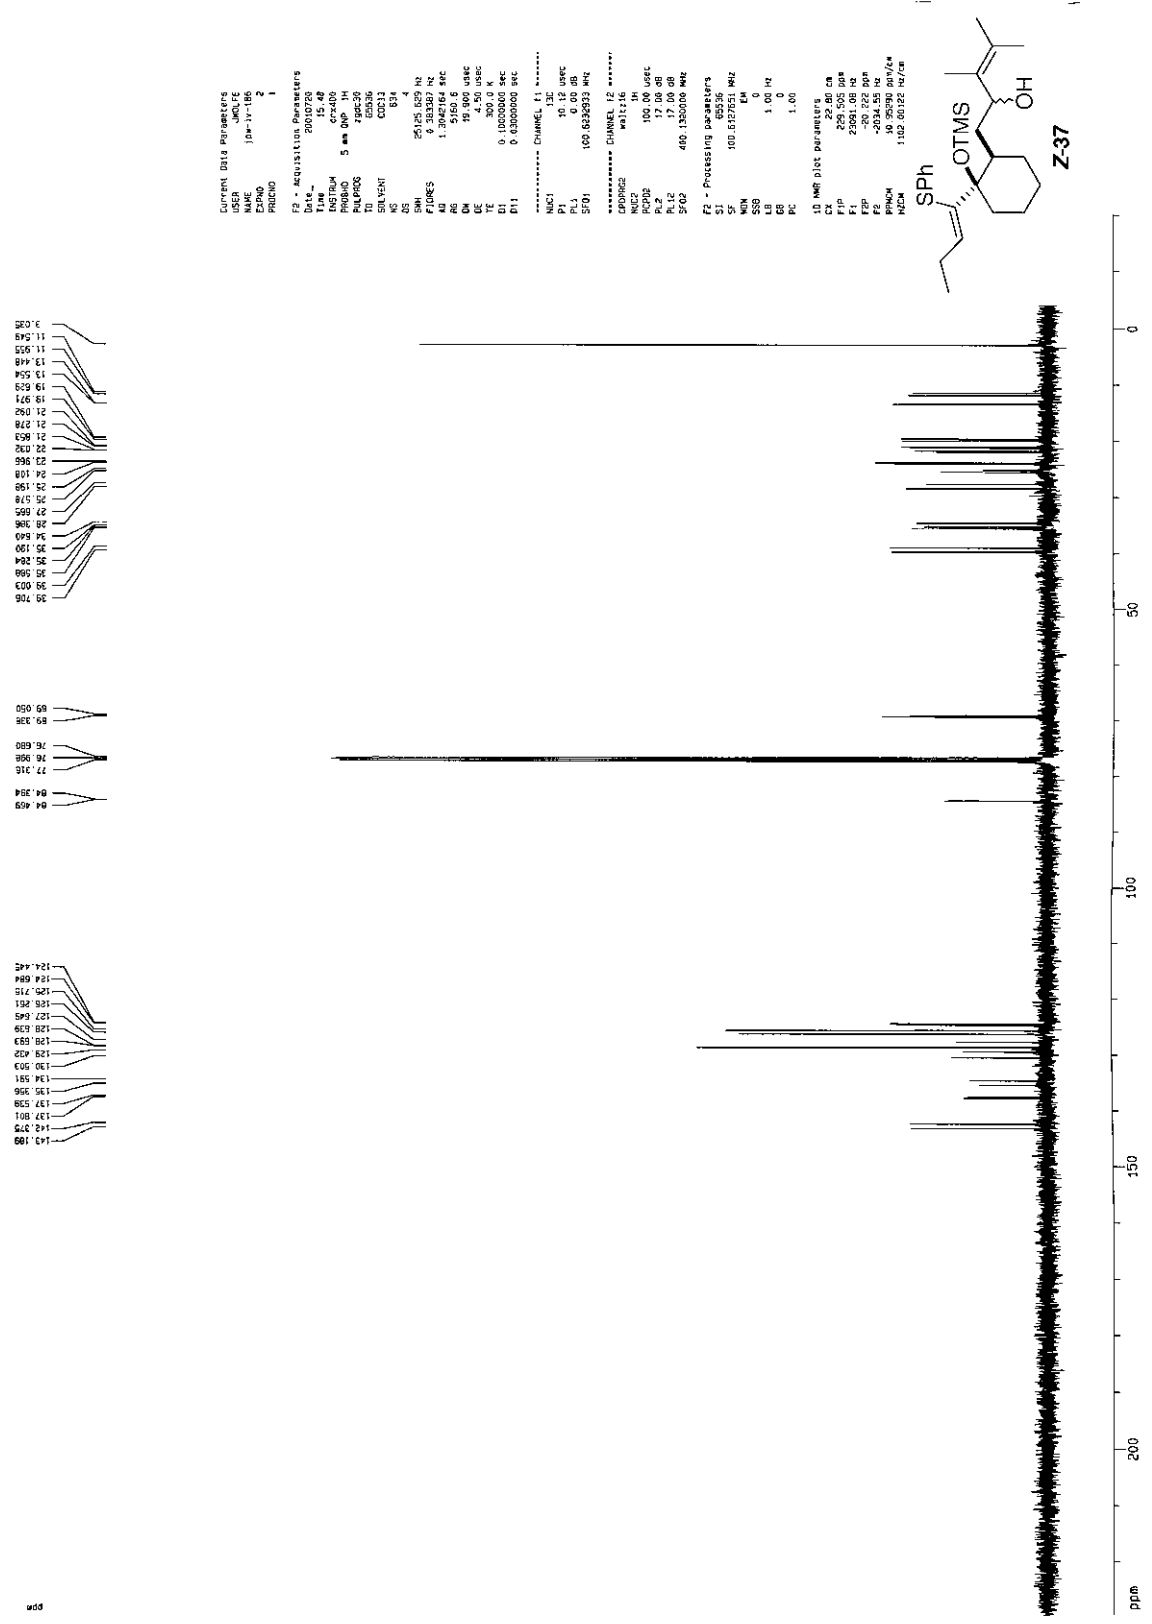

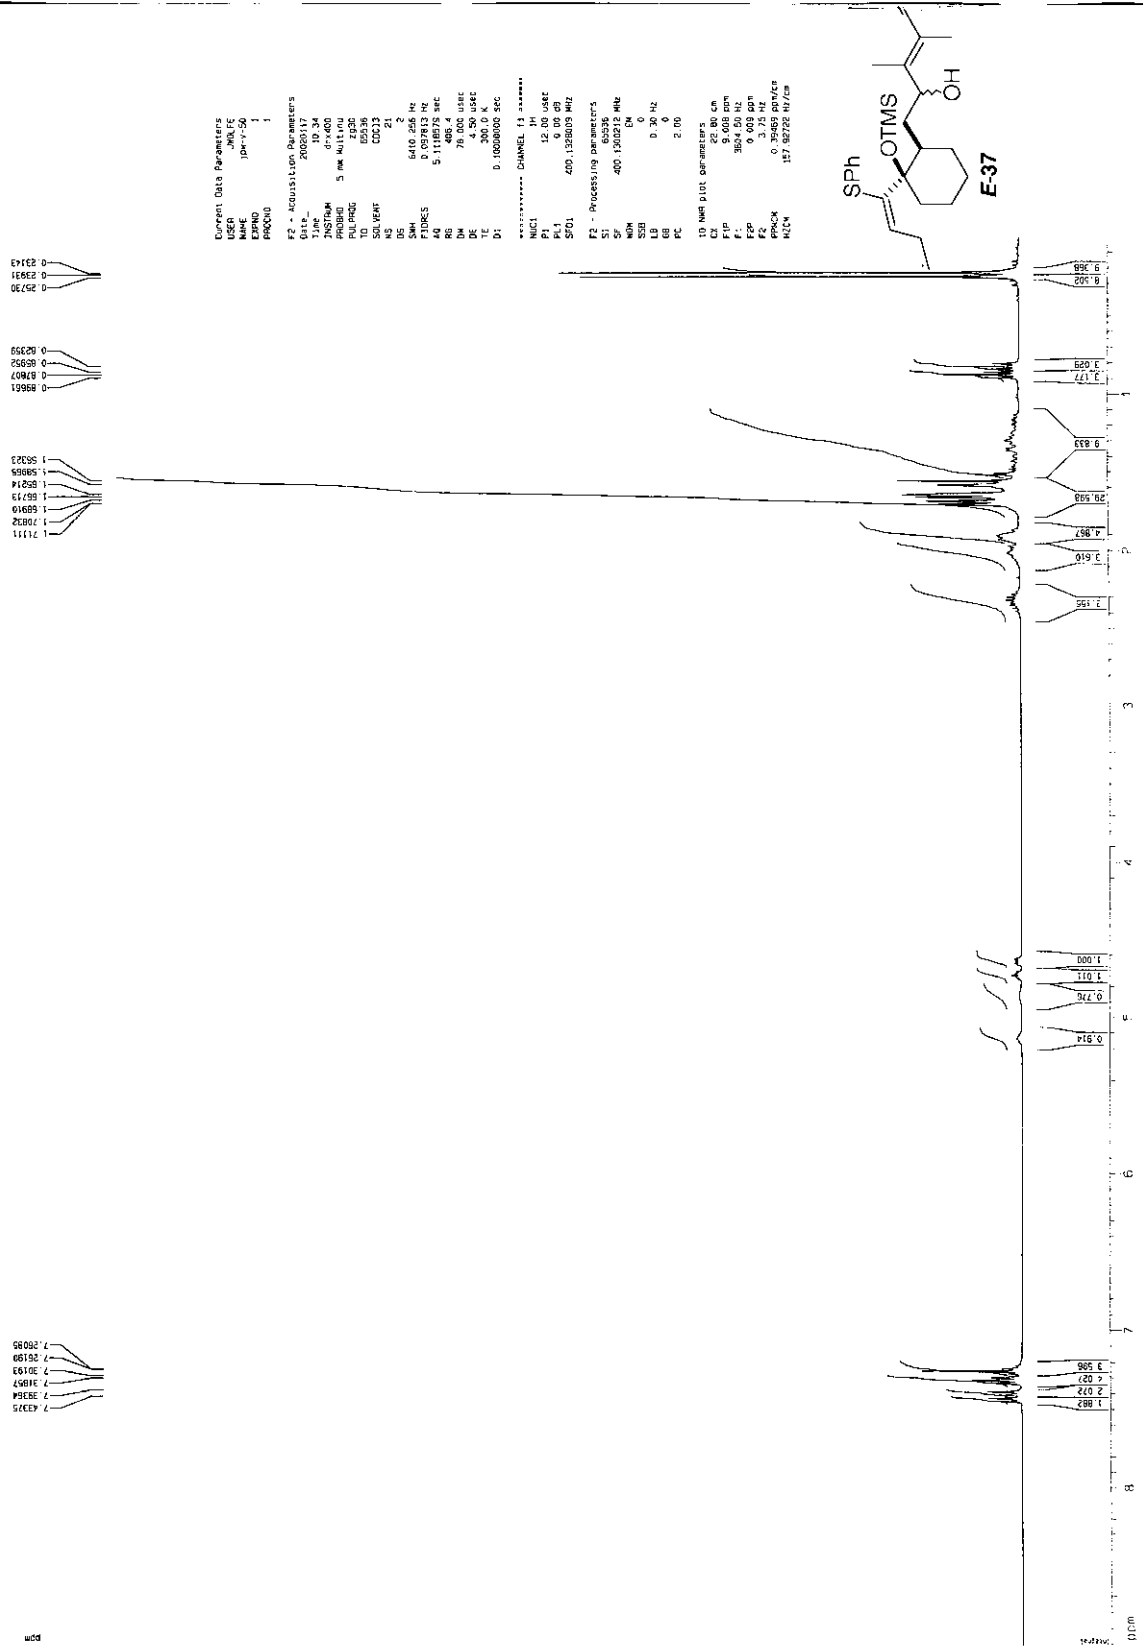

<sup>13</sup>C spectrum with <sup>1</sup>H decoupling

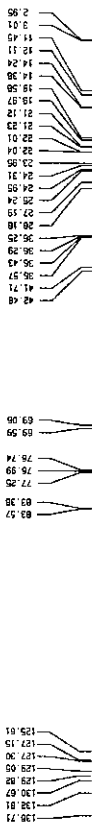

Current Data Parameters  
 NAME 100-7-95  
 EXPNO 2  
 PROCNO 1

F2 - Acquisition Parameters

Date\_ 20030117  
 Time 11:34  
 PULPROG zgpg30  
 PROCNO 5  
 F2 100.626130  
 TO 10.000000  
 DELTA 2.000000  
 INSTRUM spect  
 NS 2048  
 DS 2  
 SFO 500.13626130  
 AQ 1.000000  
 RG 1024  
 AC 11888.2  
 DM 15.500 uSBC  
 DE 2.000 uSBC  
 TE 300.2  
 O1 0.25000000 SEC  
 O11 0.03000000 SEC

\*\*\*\*\* CHANNEL f1 \*\*\*\*\*  
 NUC1 13C  
 P1 6.25 uSEC  
 PL1 0.00 dB  
 SF1 125.762656182

\*\*\*\*\* CHANNEL f2 \*\*\*\*\*  
 CHANNEL MULTIF2  
 PULPROG zgpg30  
 PL2 80.00 uSEC  
 PL2 -3.00 dB  
 PL12 13.50 dB  
 SF12 500.136261302 MHz

F2 - Processing parameters  
 SI 65536  
 SF 125.762656182 MHz  
 GB 0  
 LB 1.00 Hz  
 GB 2.00

10 MR P1.P1 parameters  
 SI 200.000 MHz  
 SF 200.260 MHz  
 F1 200.260 MHz  
 F2 200.260 MHz  
 F3 200.260 MHz  
 F4 200.260 MHz  
 F5 200.260 MHz  
 F6 200.260 MHz  
 F7 200.260 MHz  
 F8 200.260 MHz  
 F9 200.260 MHz  
 F10 200.260 MHz

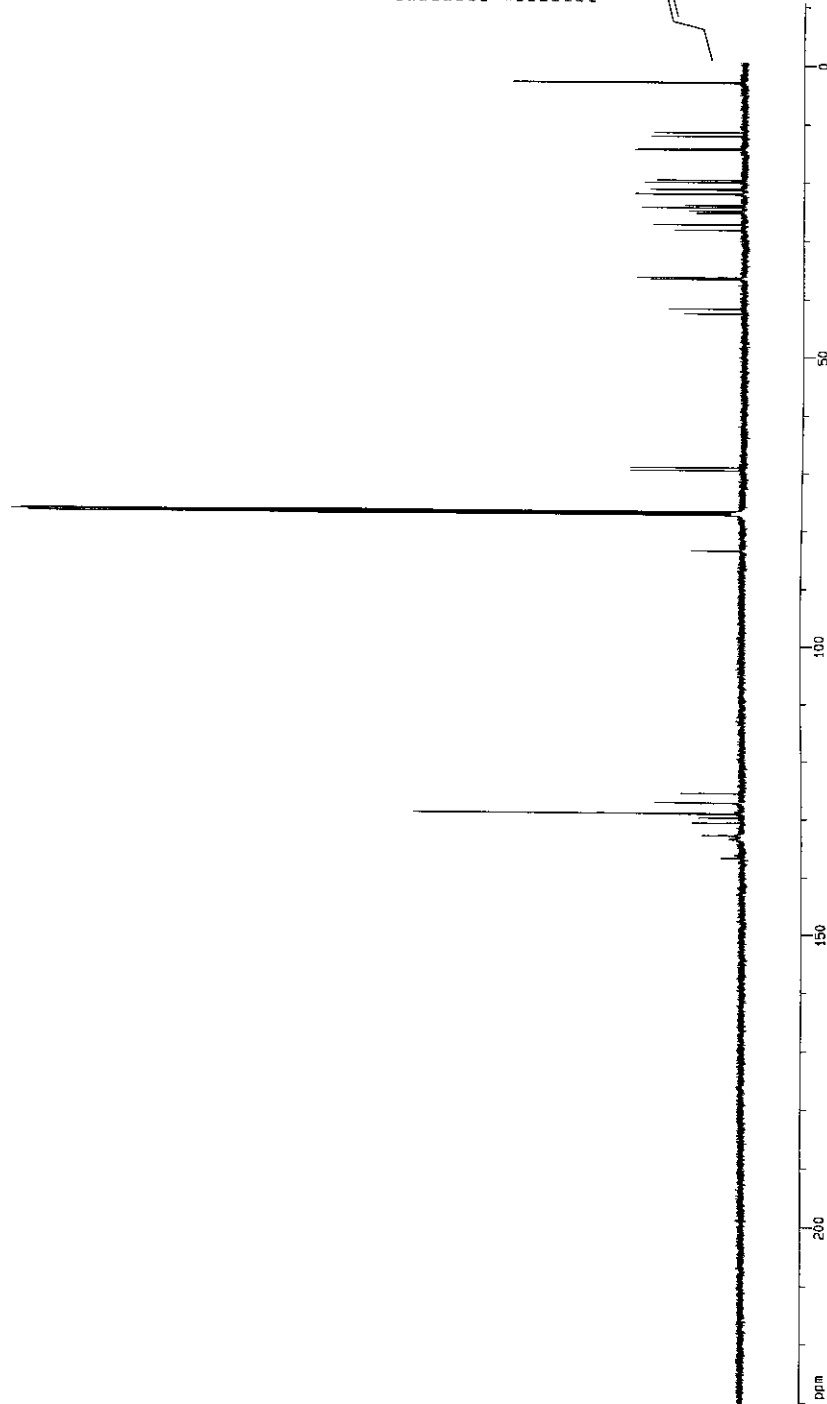

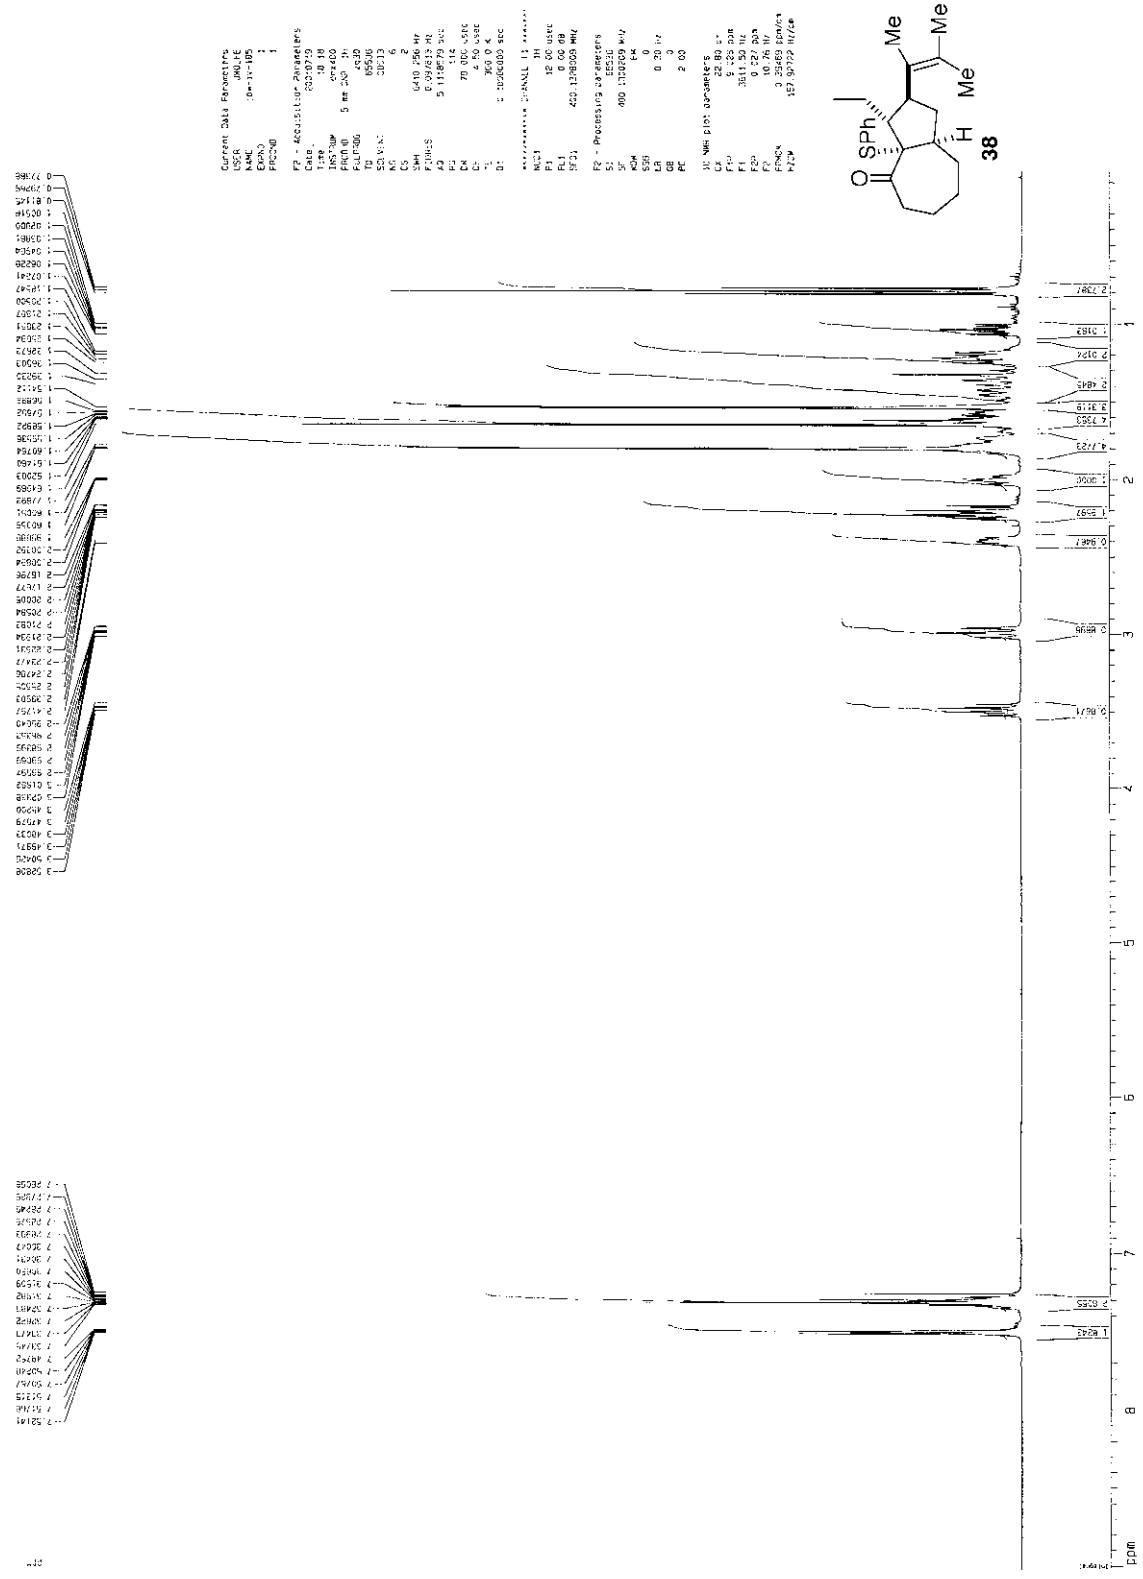



<sup>13</sup>C spectrum with <sup>1</sup>H decoupling

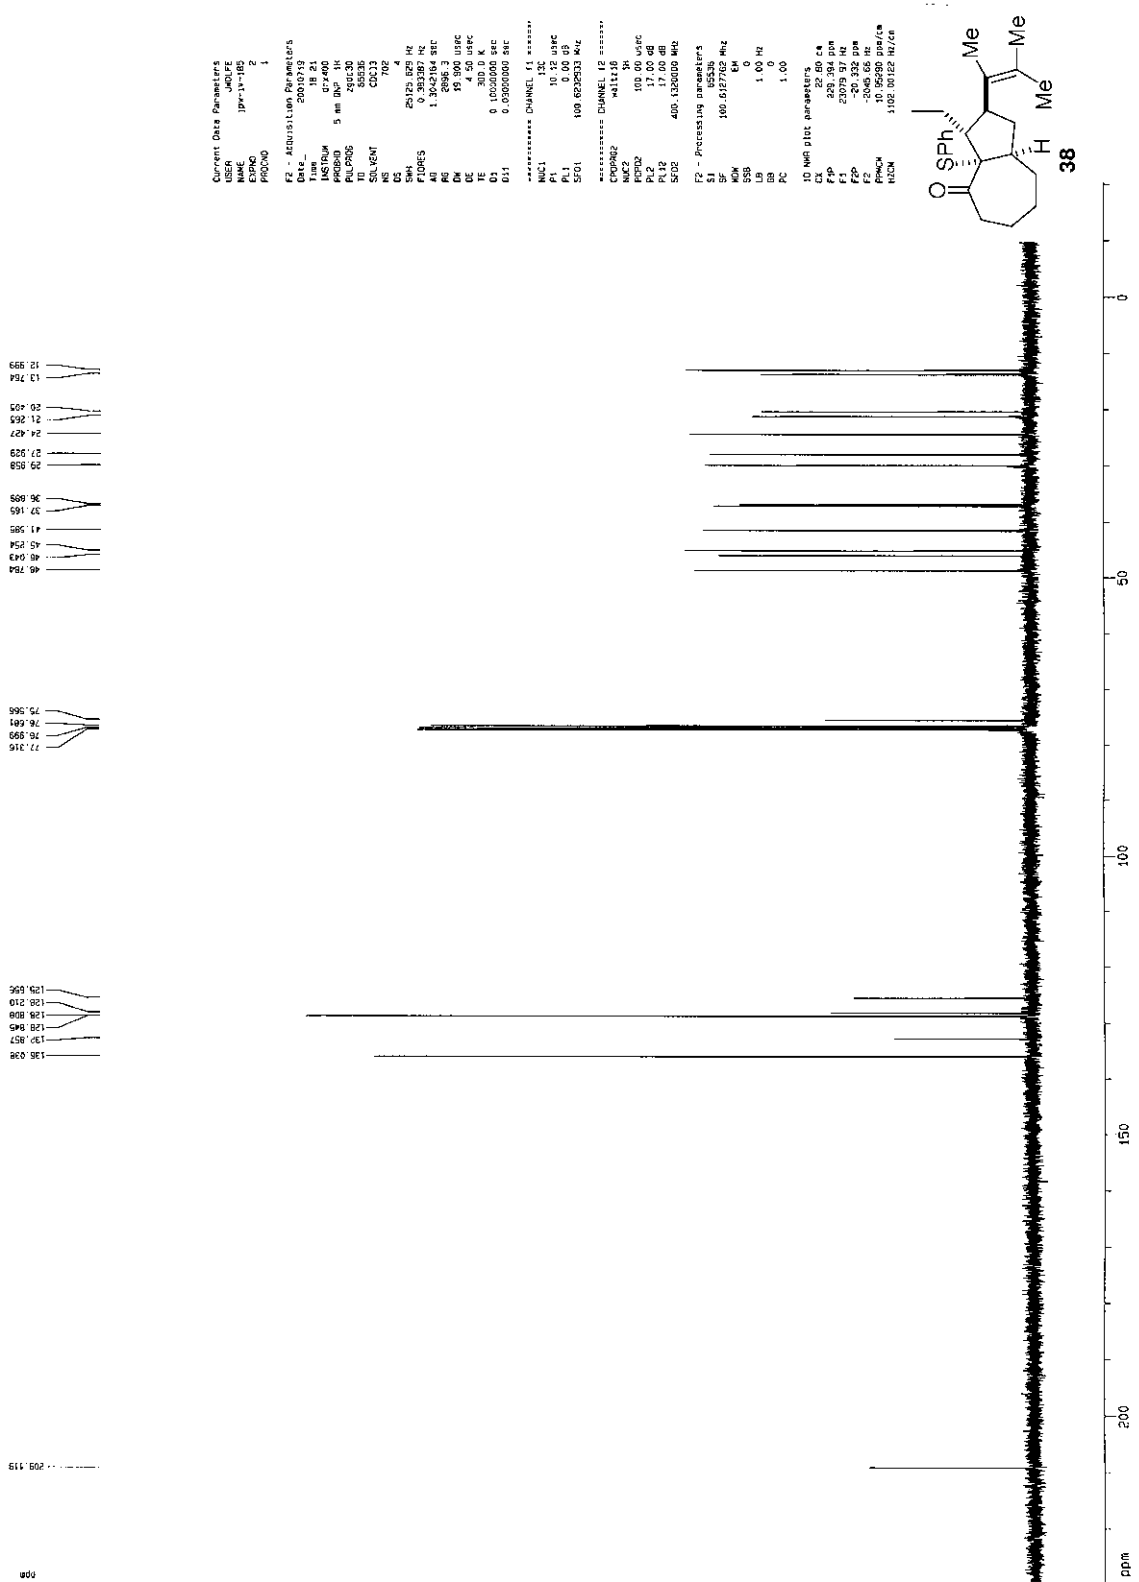

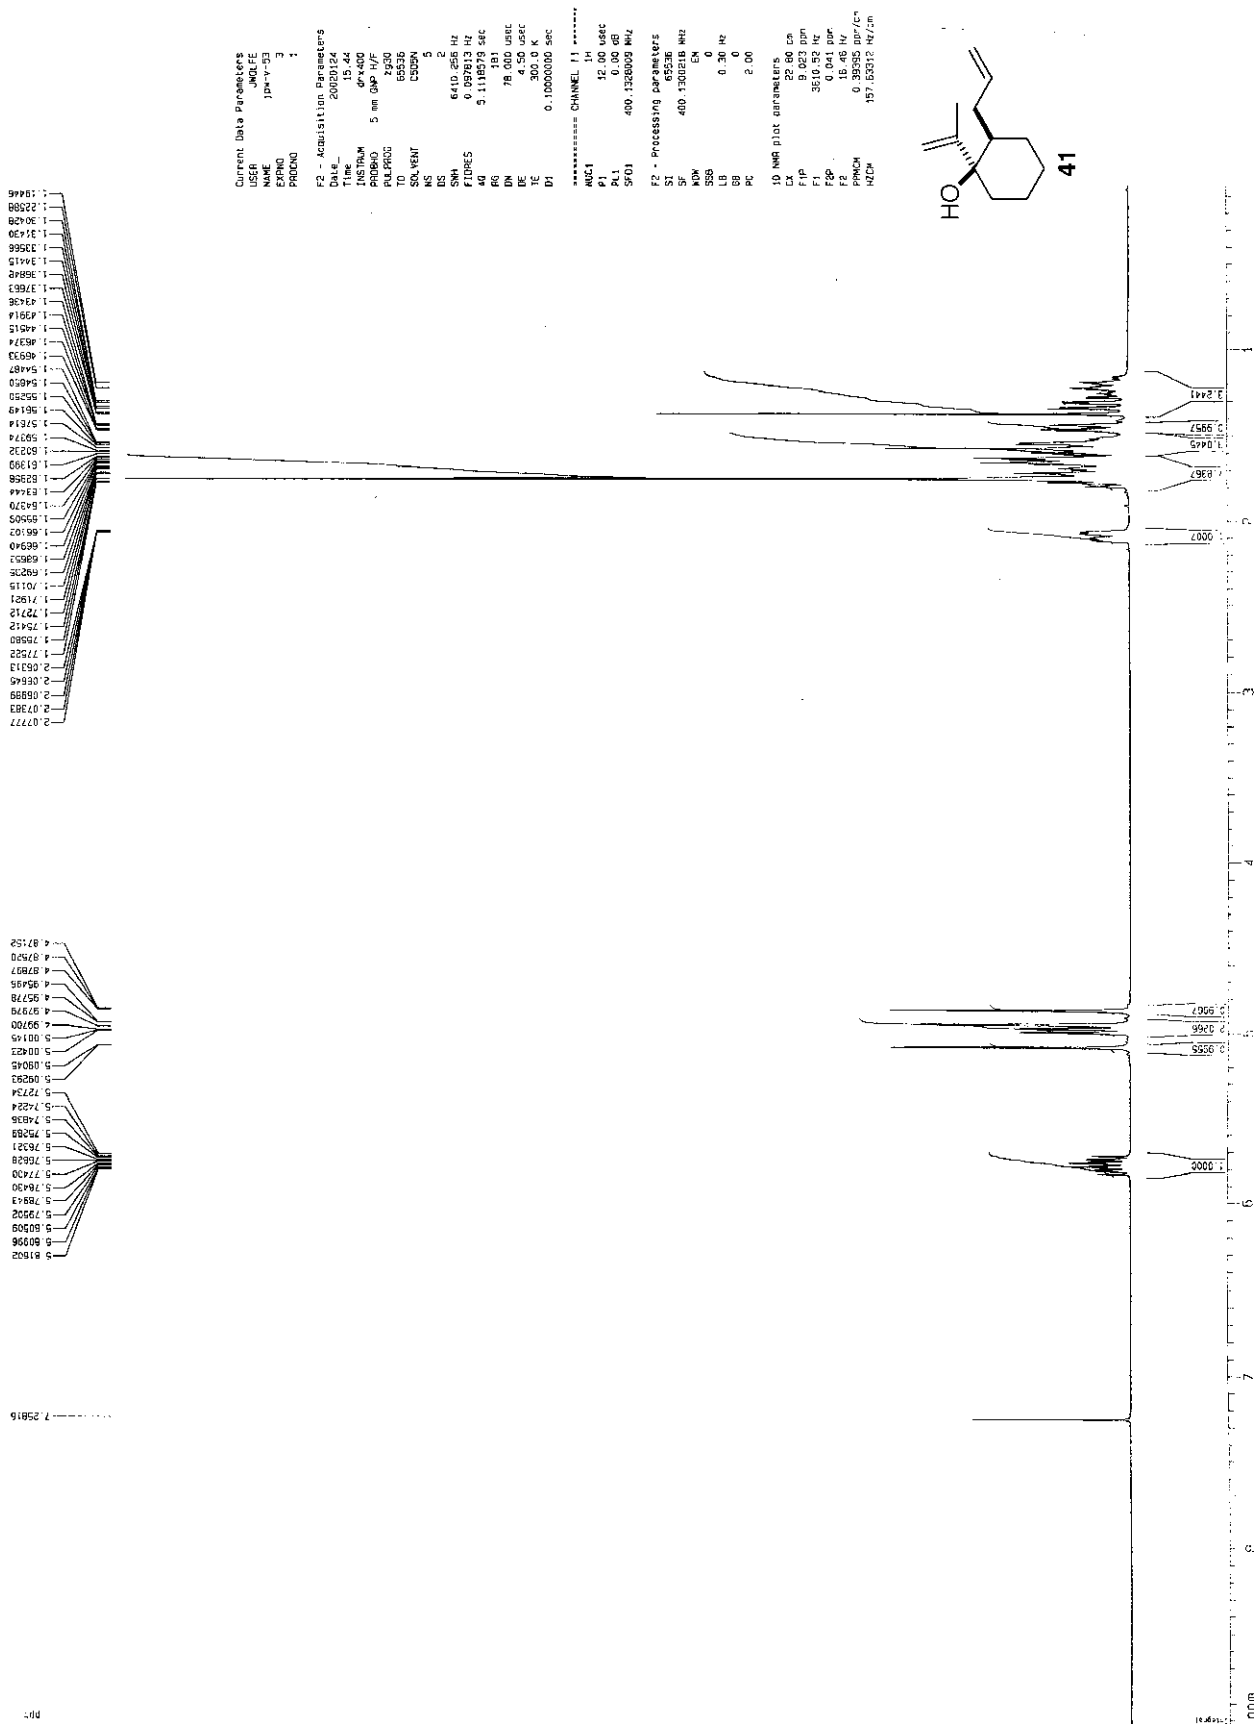

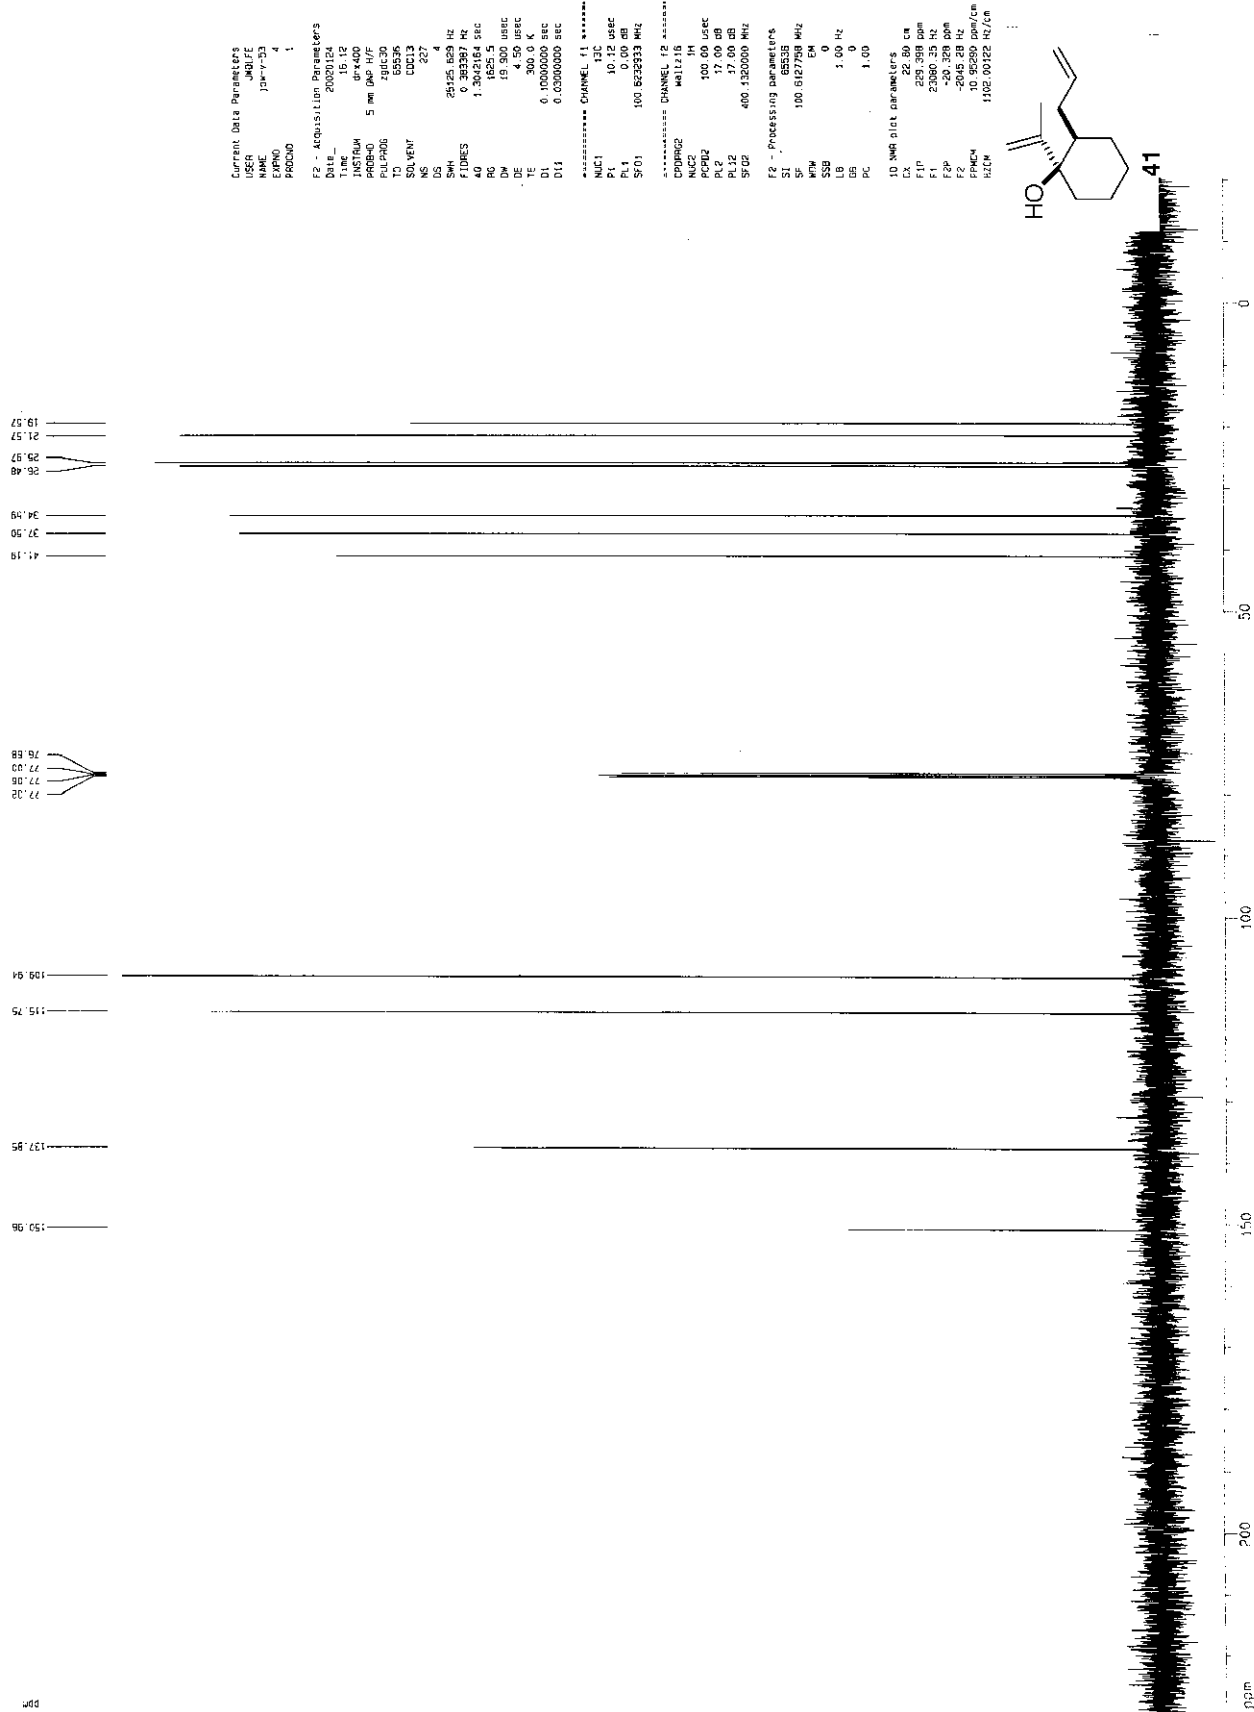

Current Data Parameters  
 USER JARIFE  
 NAME J09V23  
 EXPNO 4  
 PROCNO 1

F2 - Acquisition Parameters  
 Date\_ 20020124  
 Time 15:12  
 INSTRUM draco00  
 PULPROG zgpg30  
 TD 65536  
 SOLVENT CDCl3  
 NS 227  
 DS 4  
 SWH 26126.400 Hz  
 FIDRES 0.383897 Hz  
 AQ 1.3042164 sec  
 RG 1625.5  
 DW 19.500 usec  
 DE 4.50 usec  
 TE 300.2 K  
 D1 0.10000000 sec  
 D11 0.03000000 sec  
 D12

\*\*\*\*\* CHANNEL f1 \*\*\*\*\*  
 NUC1 13C  
 P1 10.72 usec  
 PL1 0.00 dB  
 SFO1 100.626333 MHz

\*\*\*\*\* CHANNEL f2 \*\*\*\*\*  
 CPDPRG2 MLEV15  
 NUC2 1H  
 P2 100.00 usec  
 PL2 17.00 dB  
 PL12 17.00 dB  
 SFO2 400.1320000 MHz

F2 - Processing parameters  
 SI 32768  
 SF 100.612708 MHz  
 WF 0  
 EN 0  
 SS 0  
 BS 0  
 PC 1.00

10 MHz list parameters  
 CX 22.89 cm  
 F1 225.398 ppm  
 F2 2306.43 Hz  
 F3 2306.43 Hz  
 F4 2306.43 Hz  
 F5 2306.43 Hz  
 F6 2306.43 Hz  
 F7 2306.43 Hz  
 F8 2306.43 Hz  
 F9 2306.43 Hz  
 F10 2306.43 Hz  
 F11 2306.43 Hz  
 F12 2306.43 Hz  
 F13 2306.43 Hz  
 F14 2306.43 Hz  
 F15 2306.43 Hz  
 F16 2306.43 Hz  
 F17 2306.43 Hz  
 F18 2306.43 Hz  
 F19 2306.43 Hz  
 F20 2306.43 Hz  
 F21 2306.43 Hz  
 F22 2306.43 Hz  
 F23 2306.43 Hz  
 F24 2306.43 Hz  
 F25 2306.43 Hz  
 F26 2306.43 Hz  
 F27 2306.43 Hz  
 F28 2306.43 Hz  
 F29 2306.43 Hz  
 F30 2306.43 Hz  
 F31 2306.43 Hz  
 F32 2306.43 Hz  
 F33 2306.43 Hz  
 F34 2306.43 Hz  
 F35 2306.43 Hz  
 F36 2306.43 Hz  
 F37 2306.43 Hz  
 F38 2306.43 Hz  
 F39 2306.43 Hz  
 F40 2306.43 Hz  
 F41 2306.43 Hz  
 F42 2306.43 Hz  
 F43 2306.43 Hz  
 F44 2306.43 Hz  
 F45 2306.43 Hz  
 F46 2306.43 Hz  
 F47 2306.43 Hz  
 F48 2306.43 Hz  
 F49 2306.43 Hz  
 F50 2306.43 Hz  
 F51 2306.43 Hz  
 F52 2306.43 Hz  
 F53 2306.43 Hz  
 F54 2306.43 Hz  
 F55 2306.43 Hz  
 F56 2306.43 Hz  
 F57 2306.43 Hz  
 F58 2306.43 Hz  
 F59 2306.43 Hz  
 F60 2306.43 Hz  
 F61 2306.43 Hz  
 F62 2306.43 Hz  
 F63 2306.43 Hz  
 F64 2306.43 Hz  
 F65 2306.43 Hz  
 F66 2306.43 Hz  
 F67 2306.43 Hz  
 F68 2306.43 Hz  
 F69 2306.43 Hz  
 F70 2306.43 Hz  
 F71 2306.43 Hz  
 F72 2306.43 Hz  
 F73 2306.43 Hz  
 F74 2306.43 Hz  
 F75 2306.43 Hz  
 F76 2306.43 Hz  
 F77 2306.43 Hz  
 F78 2306.43 Hz  
 F79 2306.43 Hz  
 F80 2306.43 Hz  
 F81 2306.43 Hz  
 F82 2306.43 Hz  
 F83 2306.43 Hz  
 F84 2306.43 Hz  
 F85 2306.43 Hz  
 F86 2306.43 Hz  
 F87 2306.43 Hz  
 F88 2306.43 Hz  
 F89 2306.43 Hz  
 F90 2306.43 Hz  
 F91 2306.43 Hz  
 F92 2306.43 Hz  
 F93 2306.43 Hz  
 F94 2306.43 Hz  
 F95 2306.43 Hz  
 F96 2306.43 Hz  
 F97 2306.43 Hz  
 F98 2306.43 Hz  
 F99 2306.43 Hz  
 F100 2306.43 Hz

OD-H, 1 ml/min, 90:10 H/IPA

```

=====
Injection Date   : 2/4/02 4:28:37 PM           Seq. Line :    1
Sample Name     : jpw-v-53                     Location  : Vial 44
Acq. Operator   : jpw                          Inj       :    1
                                           Inj Volume: 5 µl

Acq. Method    : D:\METHODS\JPW1.M
Last changed   : 2/4/02 3:33:02 PM by jpw
Analysis Method: D:\METHODS\ABD1.M
Last changed   : 2/4/02 5:22:56 PM by jpw
                (modified after loading)
=====

```

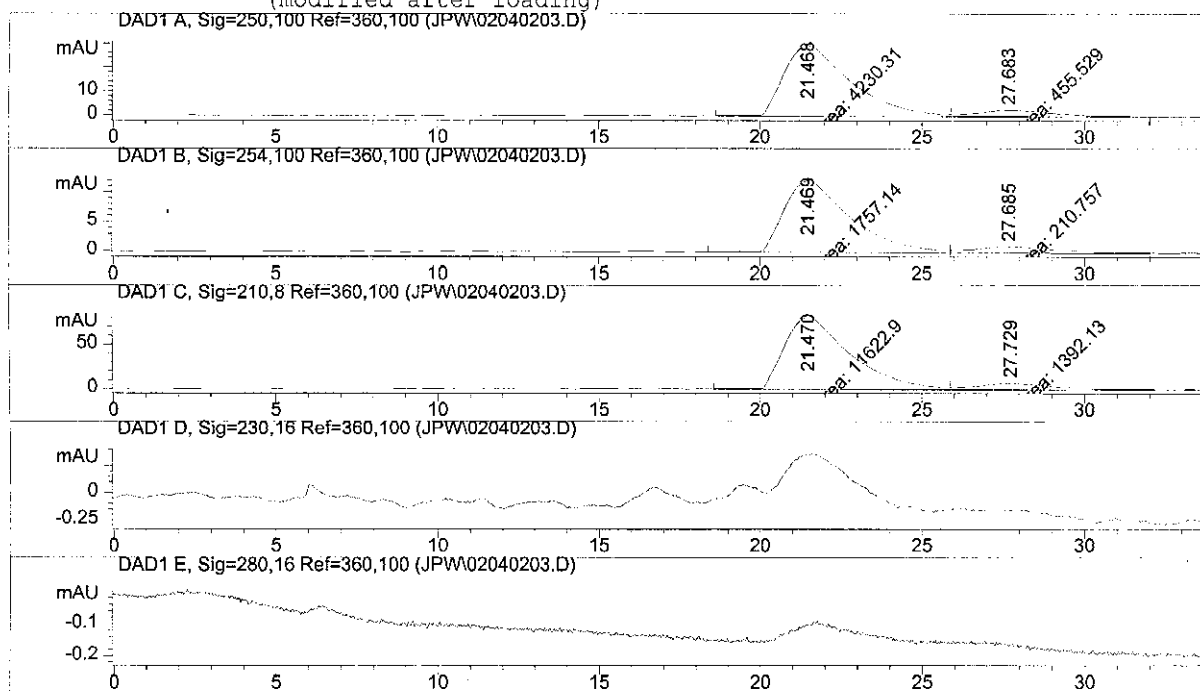

```

=====
                          Area Percent Report
=====

```

```

Sorted By      :      Signal
Multiplier    :      1.0000
Dilution      :      1.0000

```

Signal 1: DAD1 A, Sig=250,100 Ref=360,100

| Peak # | RetTime [min] | Type | Width [min] | Area [mAU*s] | Height [mAU] | Area %  |
|--------|---------------|------|-------------|--------------|--------------|---------|
| 1      | 21.468        | MF   | 2.3739      | 4230.30566   | 29.70059     | 90.2786 |
| 2      | 27.683        | FM   | 2.7612      | 455.52939    | 2.74962      | 9.7214  |

```
Totals :                      4685.83505  32.45021
```

Results obtained with enhanced integrator!

Signal 2: DAD1 B, Sig=254,100 Ref=360,100

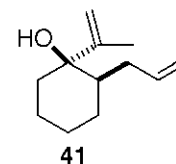

| Peak # | RetTime [min] | Type | Width [min] | Area [mAU*s] | Height [mAU] | Area %  |
|--------|---------------|------|-------------|--------------|--------------|---------|
| 1      | 21.469        | MF   | 2.3912      | 1757.14307   | 12.24726     | 89.2903 |
| 2      | 27.685        | FM   | 2.9755      | 210.75690    | 1.18050      | 10.7097 |

Totals : 1967.89996 13.42776

Results obtained with enhanced integrator!

Signal 3: DAD1 C, Sig=210,8 Ref=360,100

| Peak # | RetTime [min] | Type | Width [min] | Area [mAU*s] | Height [mAU] | Area %  |
|--------|---------------|------|-------------|--------------|--------------|---------|
| 1      | 21.470        | MF   | 2.3714      | 1.16229e4    | 81.68803     | 89.3037 |
| 2      | 27.729        | FM   | 3.0172      | 1392.13159   | 7.68991      | 10.6963 |

Totals : 1.30150e4 89.37794

Results obtained with enhanced integrator!

Signal 4: DAD1 D, Sig=230,16 Ref=360,100

Signal 5: DAD1 E, Sig=280,16 Ref=360,100

=====  
\*\*\* End of Report \*\*\*

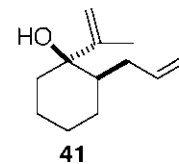

Data File D:\DATA\JPW\02040201.D

Sample Name: jpw racemic

0.75  $\mu$ l/min, 100% hexane  
OD-H, 1 ml/min, 90:10 H/IPA

=====  
 Injection Date : 2/4/02 3:34:53 PM                   Seq. Line : 1  
 Sample Name : jpw racemic                            Location : Vial 25  
 Acq. Operator : jpw                                    Inj : 1  
                                                       Inj Volume : 5  $\mu$ l

Method : D:\METHODS\JPW1.M  
 Last changed : 2/4/02 3:33:02 PM by jpw

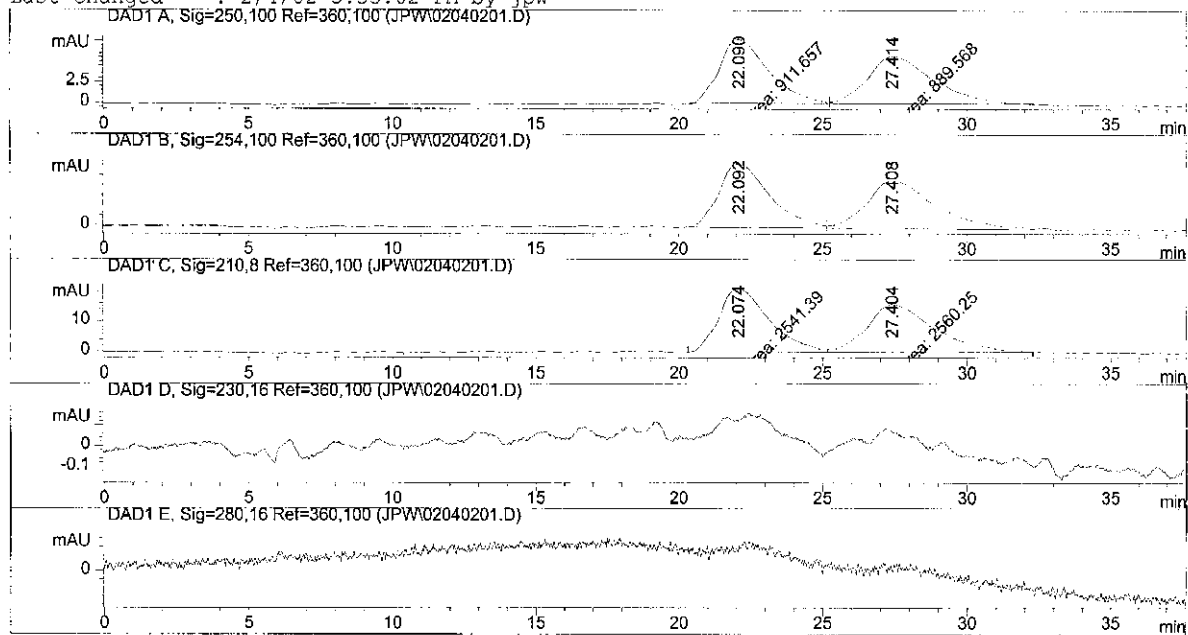

=====  
 Area Percent Report  
 =====

Sorted By : Signal  
 Multiplier : 1.0000  
 Dilution : 1.0000

Signal 1: DAD1 A, Sig=250,100 Ref=360,100

| Peak # | RetTime [min] | Type | Width [min] | Area [mAU*s] | Height [mAU] | Area %  |
|--------|---------------|------|-------------|--------------|--------------|---------|
| 1      | 22.090        | MF   | 1.9762      | 911.65656    | 7.68858      | 50.6132 |
| 2      | 27.414        | FM   | 2.6105      | 889.56787    | 5.67935      | 49.3868 |

Totals : 1801.22443 13.36793

Results obtained with enhanced integrator!

Signal 2: DAD1 B, Sig=254,100 Ref=360,100

| Peak # | RetTime [min] | Type | Width [min] | Area [mAU*s] | Height [mAU] | Area %  |
|--------|---------------|------|-------------|--------------|--------------|---------|
| 1      | 22.092        | BV   | 1.4428      | 386.30969    | 3.16756      | 49.6592 |
| 2      | 27.408        | VV   | 1.9292      | 391.61270    | 2.37557      | 50.3408 |

Totals : 777.92239 5.54313

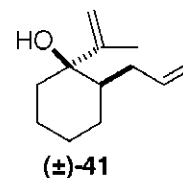

File D:\DATA\JPW\02040201.D

Sample Name: jpw racemic

Results obtained with enhanced integrator!

Signal 3: DAD1 C, Sig=210,8 Ref=360,100

| Peak # | RetTime [min] | Type | Width [min] | Area [mAU*s] | Height [mAU] | Area %  |
|--------|---------------|------|-------------|--------------|--------------|---------|
| 1      | 22.074        | MF   | 2.0153      | 2541.38574   | 21.01745     | 49.8151 |
| 2      | 27.404        | FM   | 2.7143      | 2560.25171   | 15.72081     | 50.1849 |

Totals : 5101.63745 36.73827

Results obtained with enhanced integrator!

Signal 4: DAD1 D, Sig=230,16 Ref=360,100

Signal 5: DAD1 E, Sig=280,16 Ref=360,100

=====  
\*\*\* End of Report \*\*\*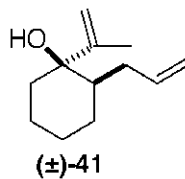

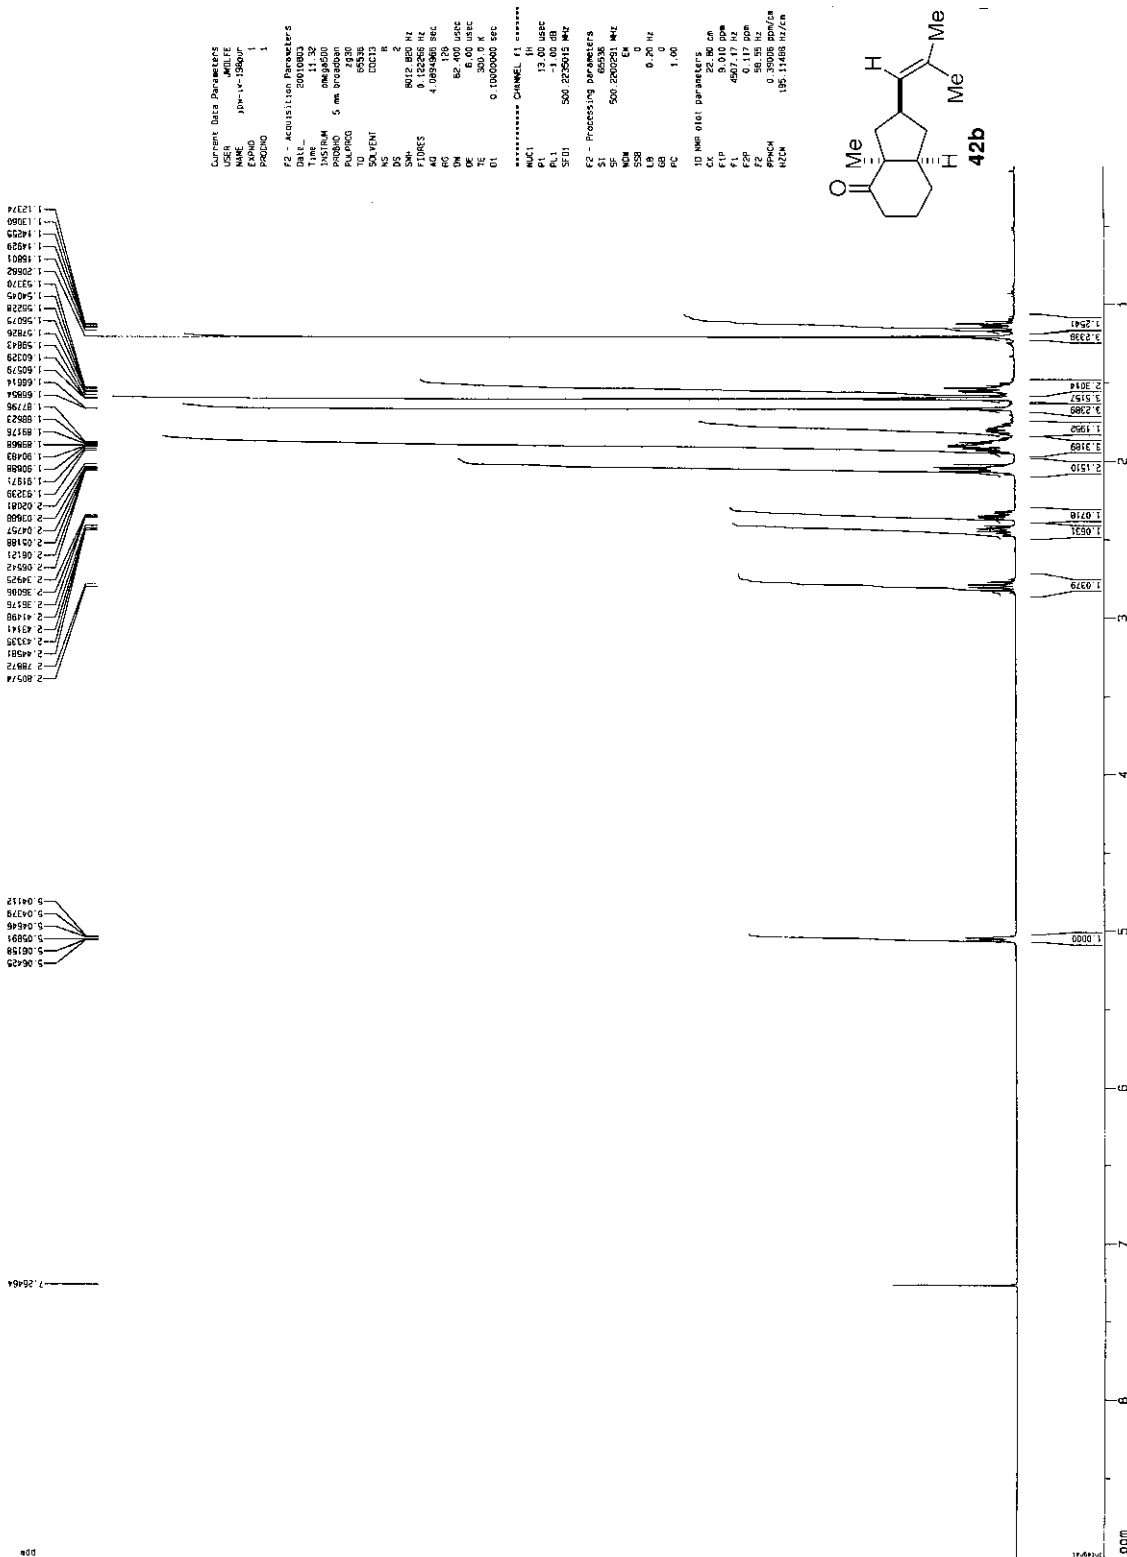



## 13C spectrum with 1H decoupling

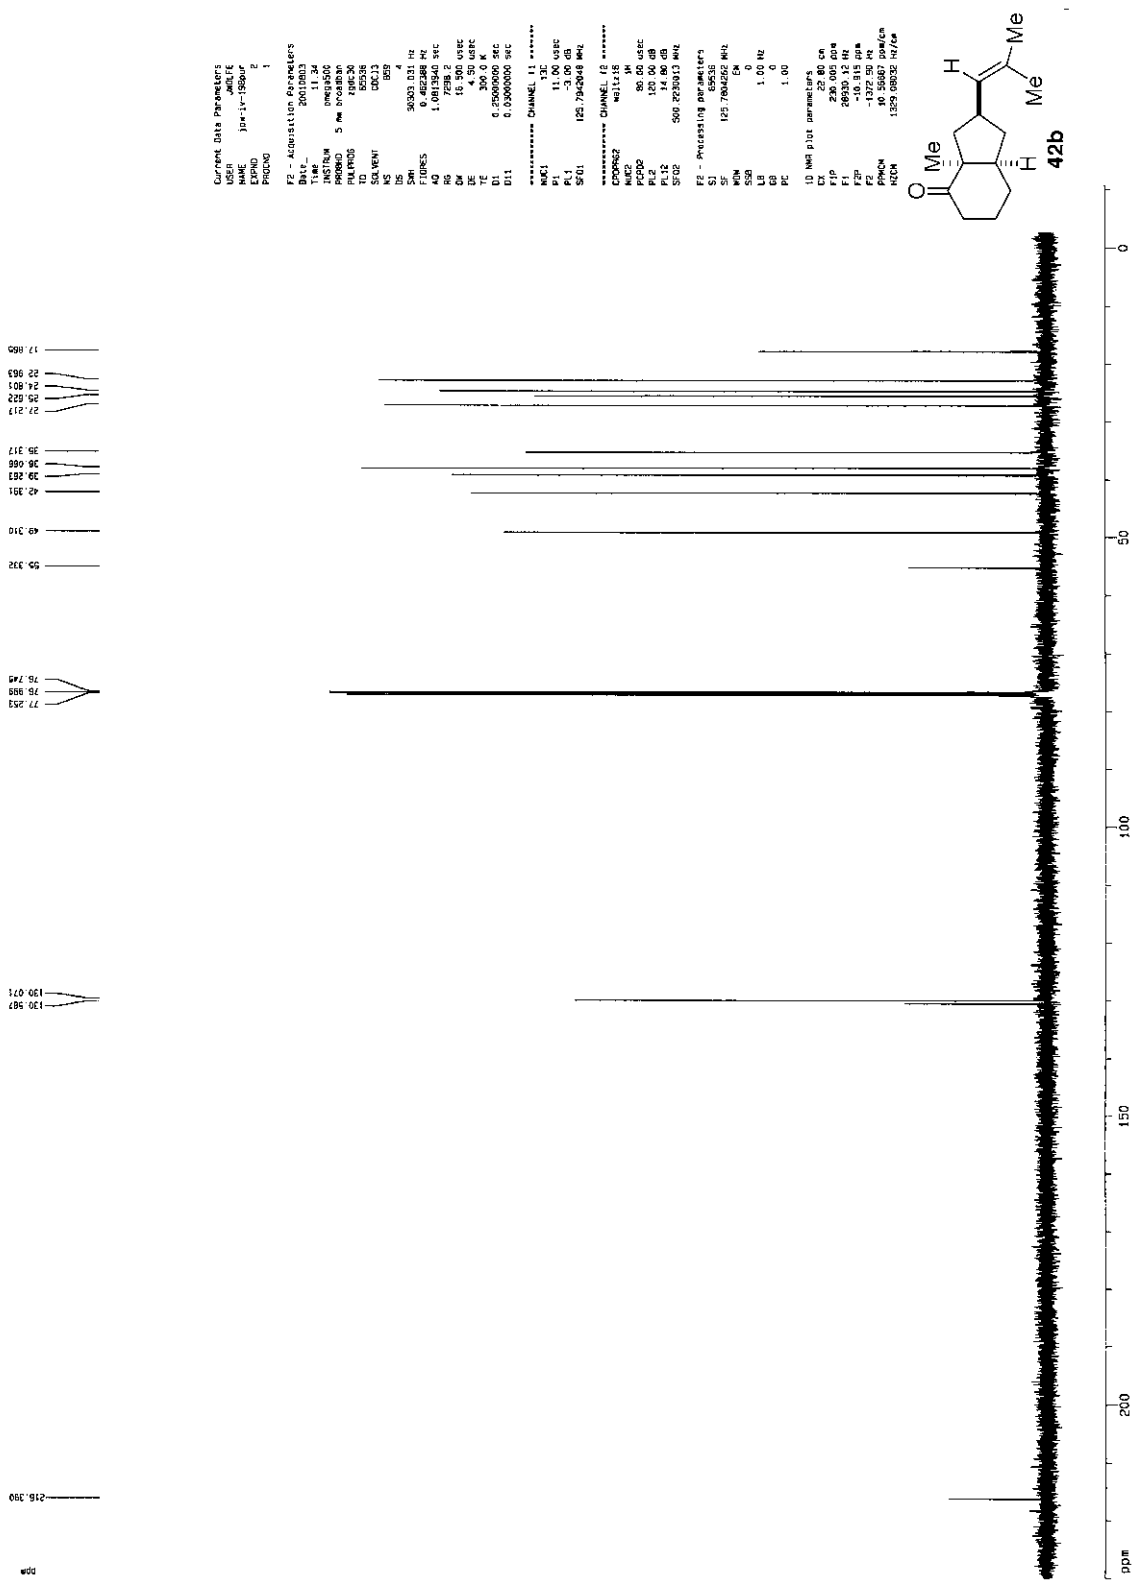



13C spectrum with 1H decoupling

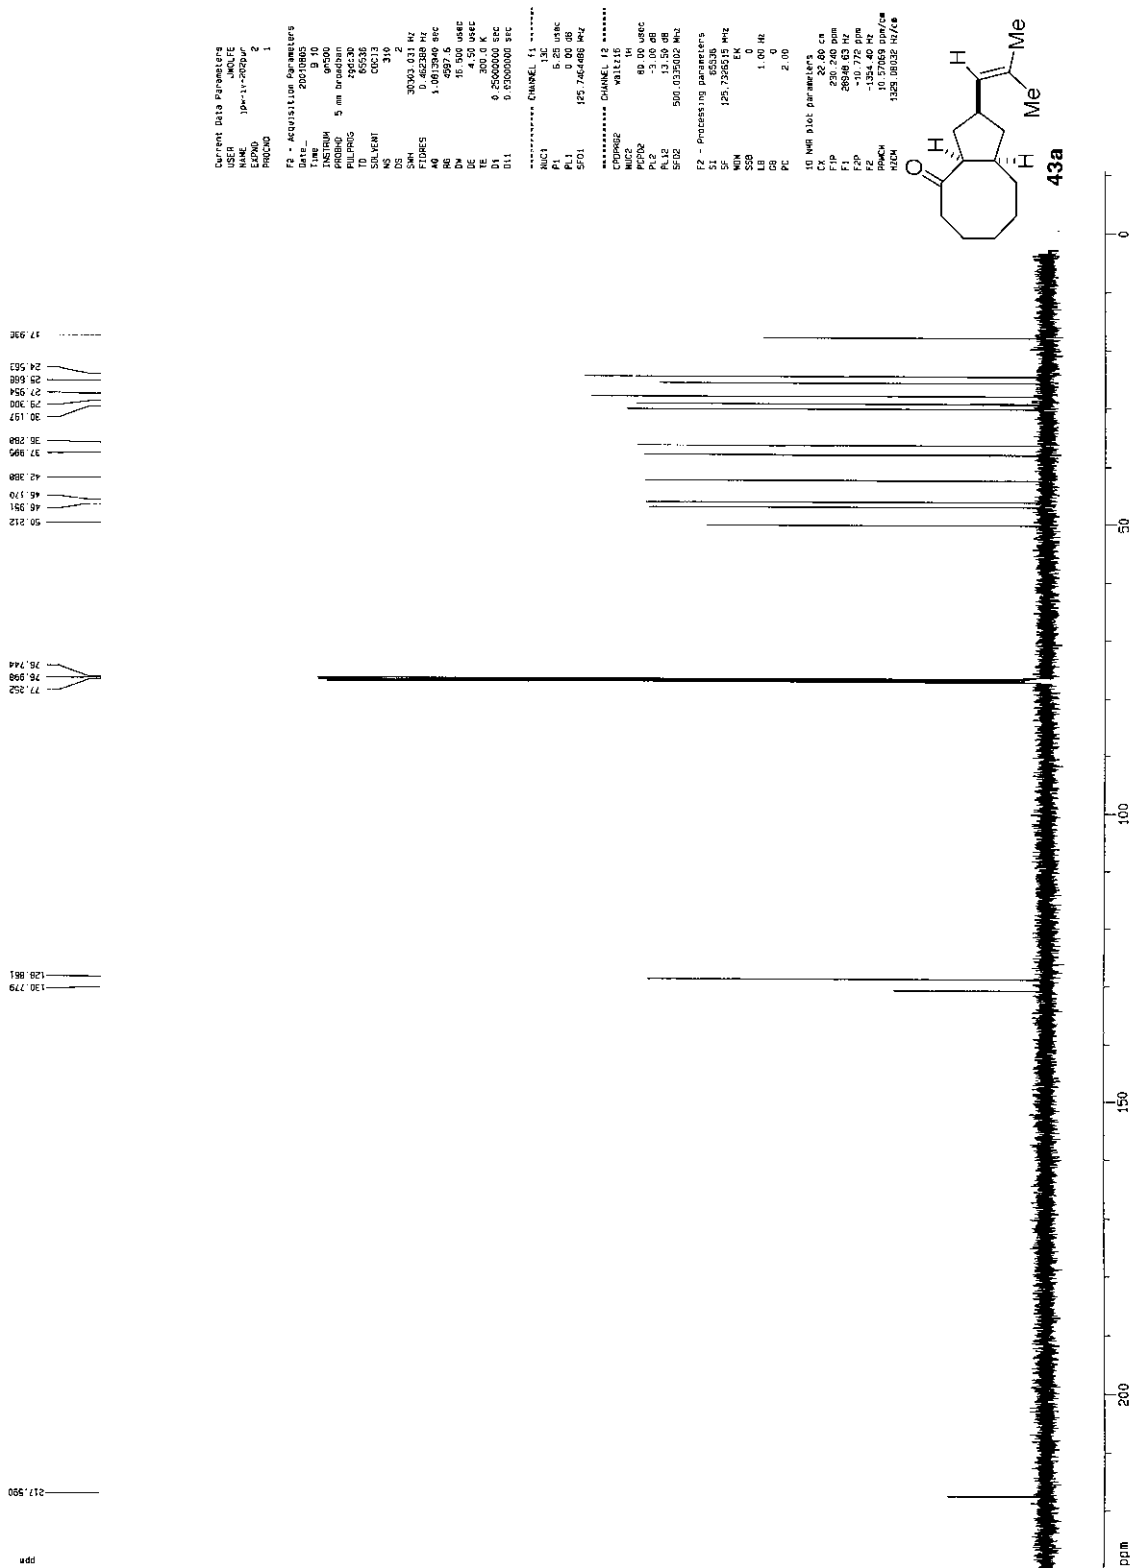

1H Spectrum

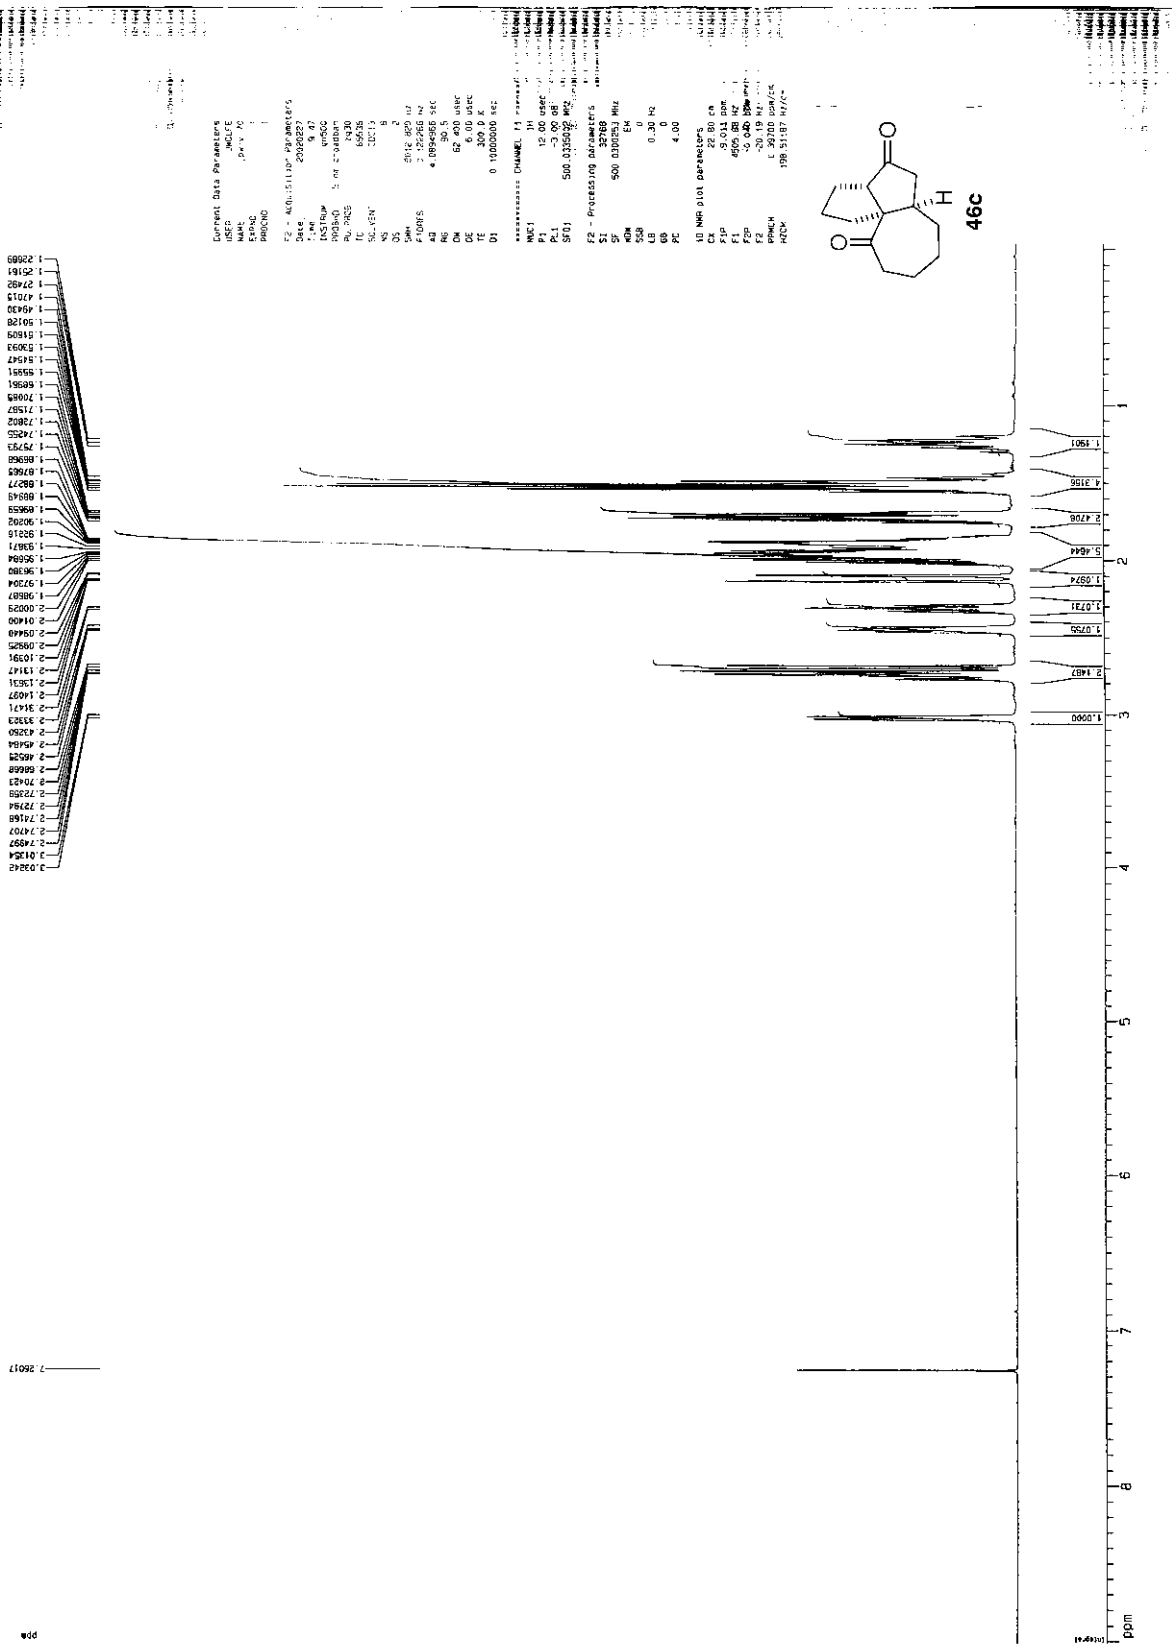

<sup>13</sup>C spectrum with <sup>1</sup>H decoupling

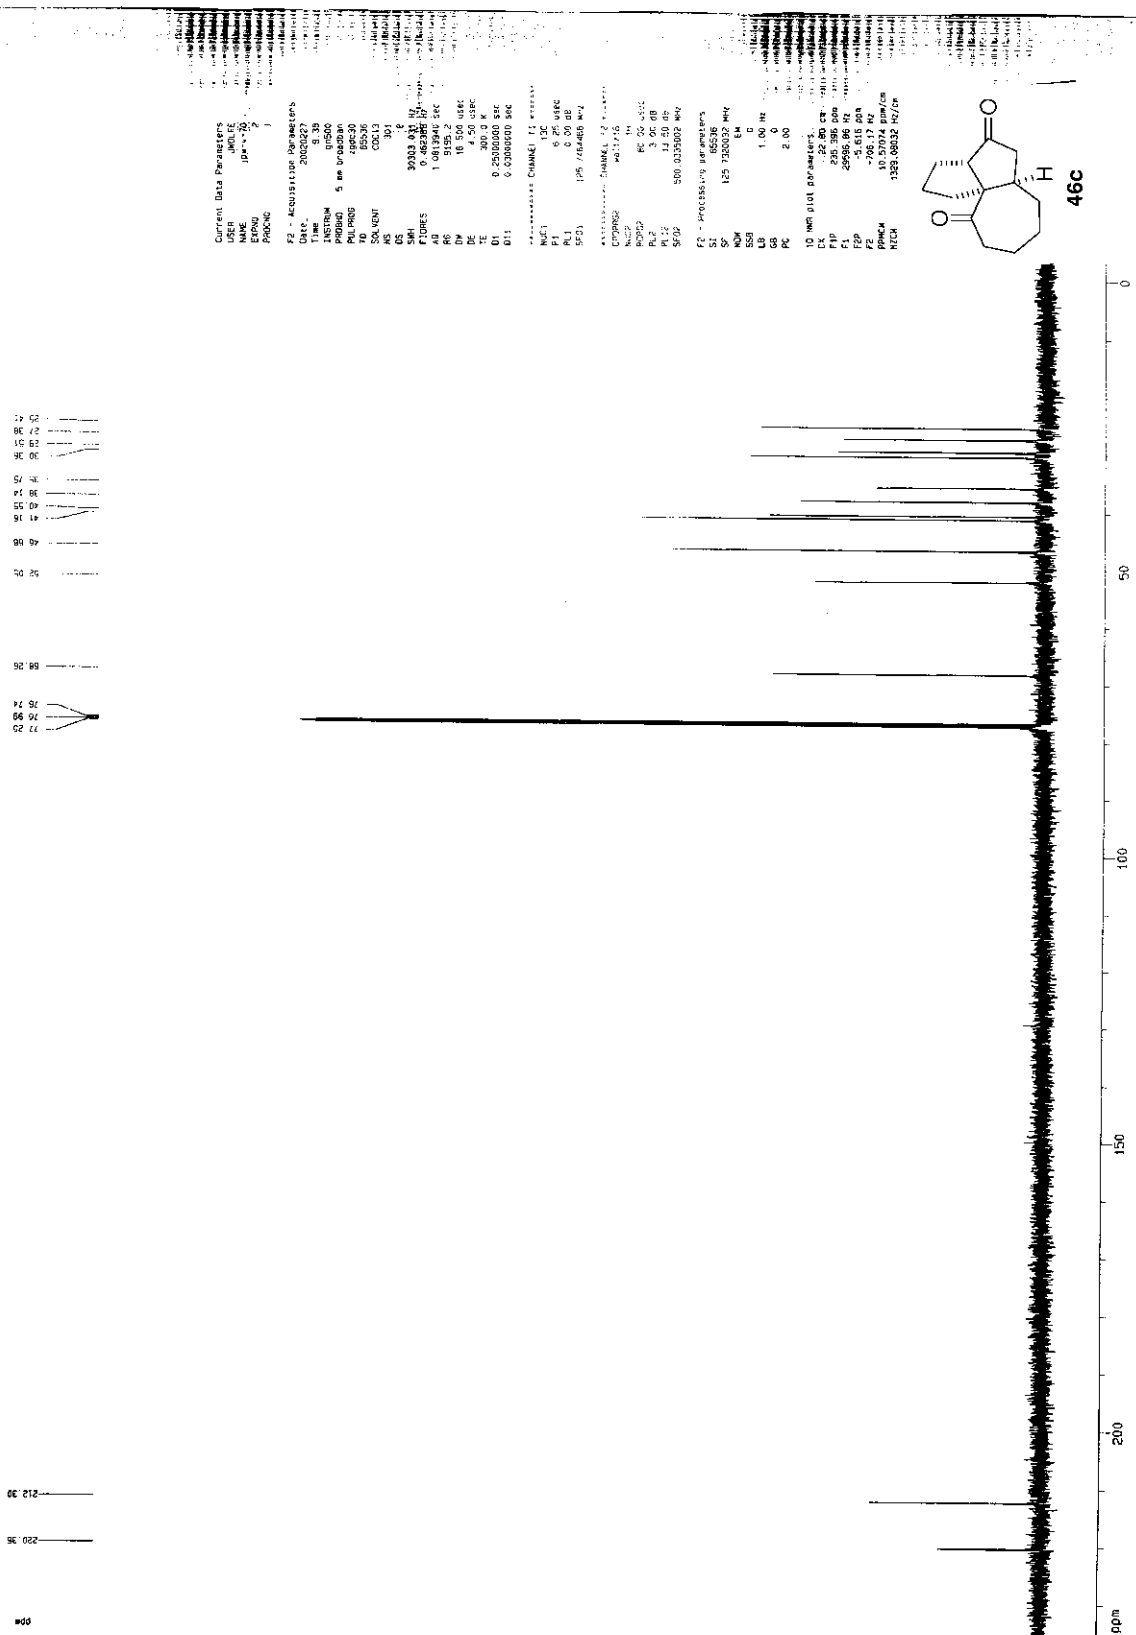

Current Data Parameters  
 USER JMW  
 NAME JMW-70  
 EXPNO 2  
 PROCNO 1

F2 - Acquisition Parameters  
 Date\_ 20020227  
 Time\_ 11:55:13  
 INSTRM spect  
 PROBHD 5 mm Bruker  
 PULPROG zgpg30  
 SFO1 500.135002 MHz  
 SKINVT 0.0013  
 NS 301  
 DS 4  
 SWH 3000.814 Hz  
 FIDRES 0.462381 Hz  
 AQ 1.0613946 sec  
 RG 512.2  
 RE 16.51484  
 DE 4.50 uS  
 TE 300.2 K  
 D1 0.2500000 sec  
 D11 0.0300000 sec

----- CHANNEL f1 -----  
 NUC1 <sup>13</sup>C  
 P1 130 nS  
 PL1 0.00 dB  
 SFO1 500.135002 MHz

----- CHANNEL f2 -----  
 NUC2 <sup>1</sup>H  
 P2 20 nS  
 PL2 0.00 dB  
 SFO2 500.135002 MHz

C2 - Processing parameters  
 SI 32768  
 SF 125.730032 MHz  
 EM 4  
 NDW 0  
 LB 1.00 Hz  
 GB 0  
 PC 2.00

10 NMR data parameters  
 CK 22.800000000000000  
 F1F 238.386000000000000  
 F2F 259.616000000000000  
 F3F 276.117000000000000  
 F4F 293.618000000000000  
 F5F 312.181000000000000  
 F6F 331.806000000000000  
 F7F 352.493000000000000  
 F8F 374.242000000000000  
 F9F 397.054000000000000  
 F10F 420.930000000000000



<sup>13</sup>C spectrum with <sup>1</sup>H decoupling

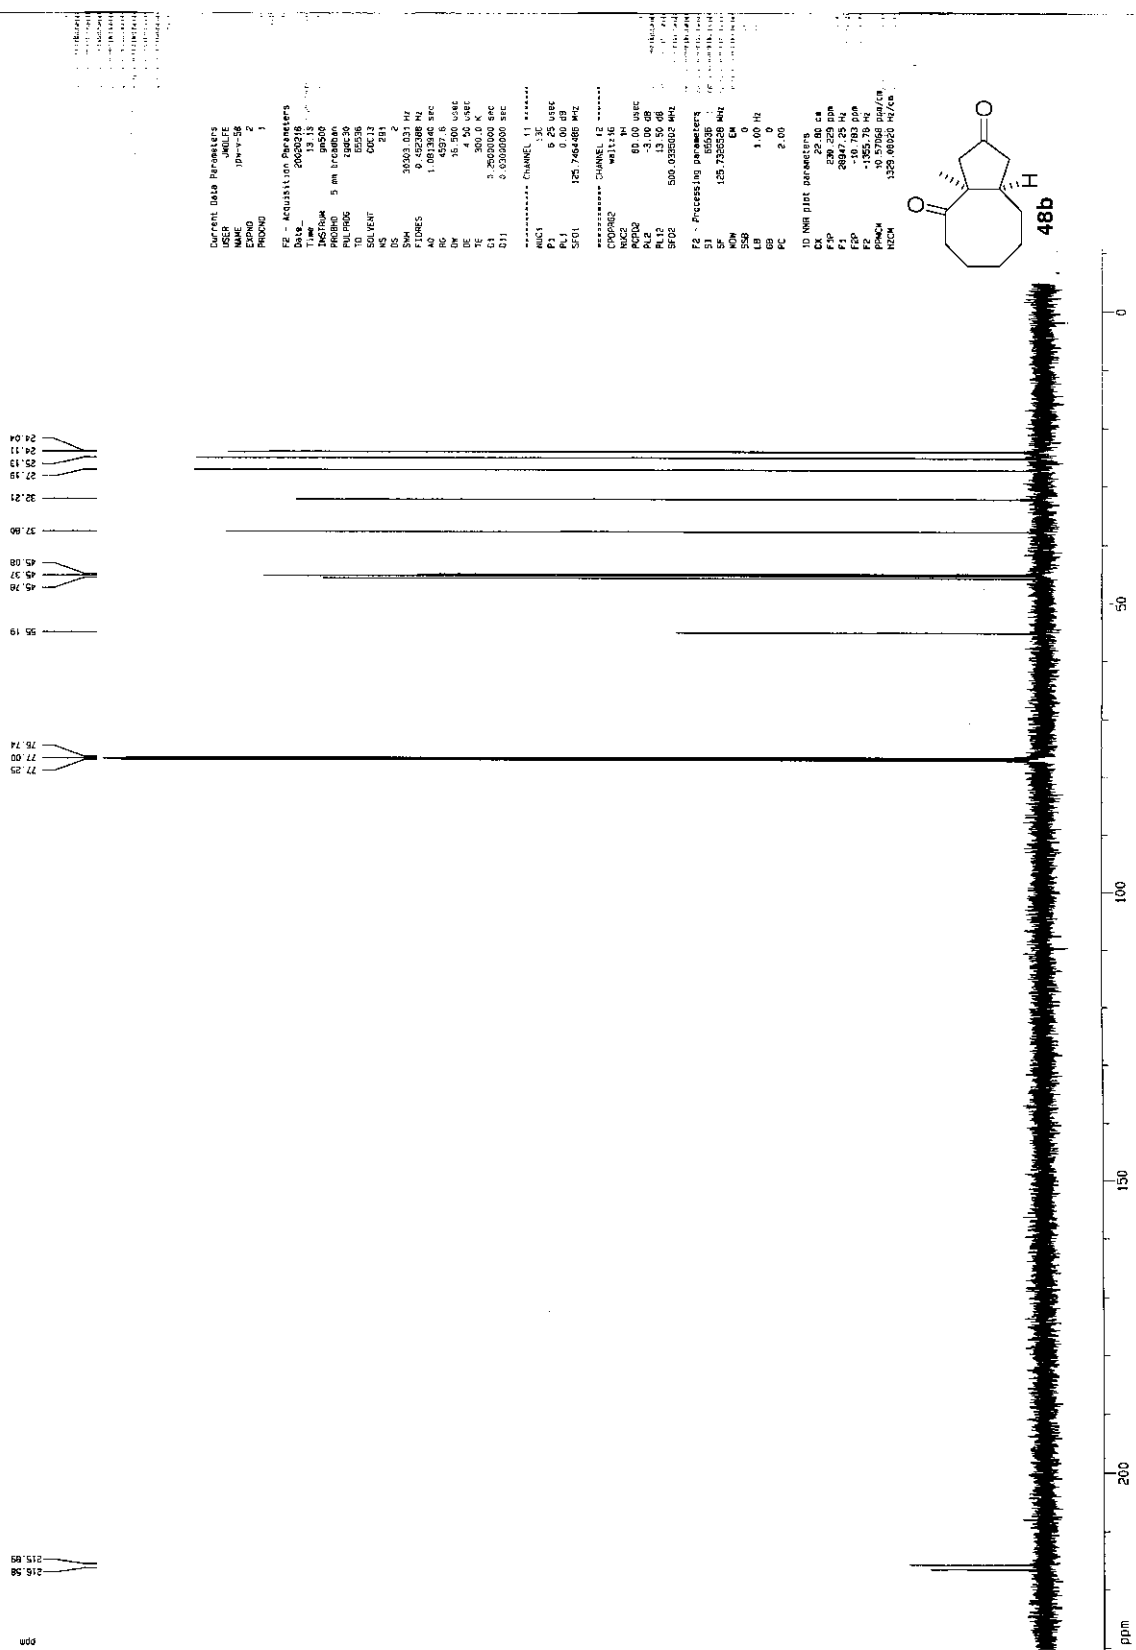

Current Data Parameters  
 USER JML/EE  
 INSTR JNM-5B  
 PULPROG zgpg30  
 PROBRG 1  
 F2 - Acquisition Parameters  
 Date\_ Time 20020213 13:13  
 INSTRUM spect  
 PROBHD 5 mm Inverse  
 PULPROG zgpg30  
 TO 65536  
 SOLVENT CDCl3  
 NS 213  
 SM 3000.031 MHz  
 FIDRES 0.492488 MHz  
 AQ 1.0013346 SEC  
 SFO1 125.7604486 MHz  
 CW 16.500 MHz  
 DE 4.50 MHz  
 FE 300.0 MHz  
 CD 0.0000000 SEC  
 D11 0.50000000 SEC  
 \*\*\*\*\* CHANNEL f1 \*\*\*\*\*  
 NU1 6.25 MHz  
 P1 0.00 dB  
 PL1 125.7604486 MHz  
 \*\*\*\*\* CHANNEL f2 \*\*\*\*\*  
 CPOPRG2 waltz16  
 INCD 60.00 MHz  
 PDC 3.00 dB  
 PL2 13.50 MHz  
 SFO2 500.0350002 MHz  
 F2 - Processing parameters  
 SI 65536  
 SF 125.7355528 MHz  
 LB 0  
 LB 1.00 MHz  
 GB 0  
 PC 2.00  
 ID NMR P131 PARAMETERS  
 CX 22.80 CA  
 CZ 200.220 CA  
 F1 150.703 MHz  
 F2 -1325.78 MHz  
 PPM0 0.070568 ppm/CA  
 RECA 1325.66620 MHz/CA
